# Supplementary material
Source: PubMed Central journal article supplement (PMC8889753)
Supplement: NIHMS1773801-supplement-Supplementary_Information.pdf [file NIHMS1773801-supplement-Supplementary_Information.pdf]

## Supporting Information

### Table of Contents

|                                                                                 |     |
|---------------------------------------------------------------------------------|-----|
| 1. General.....                                                                 | 2   |
| 2. Optimization of the hydroamination of 1,3-diene (2a) with pyrazole (1a)..... | 3   |
| 3. General procedure for the hydroamination of 1,3-dienes with azoles.....      | 5   |
| 4. Mechanism studies .....                                                      | 15  |
| 4A. Deuterium-labeling study .....                                              | 15  |
| 4B. Initial Rate Kinetic Isotope Effects (KIE) study.....                       | 19  |
| 4C. Diene Geometry Study.....                                                   | 20  |
| 4D. Crossover Studies .....                                                     | 22  |
| 4E. Stability of Product 3aa .....                                              | 25  |
| 4F. Rate studies .....                                                          | 28  |
| 5. ECD Studies.....                                                             | 34  |
| 6. NMR spectra of unknown compounds .....                                       | 42  |
| 7. SFC spectra .....                                                            | 74  |
| 8. References.....                                                              | 103 |

## 1. General

Commercial reagents were purchased from Sigma Aldrich, Strem, Alfa Aesar, Acros Organics, and Combi-blocks. Anhydrous cyclopentylmethyl ether (CPME) was purchased from Sigma Aldrich, degassed by three freeze-pump-thaw cycles, and stored within a N<sub>2</sub>-filled glove box. All experiments were performed in oven-dried or flame-dried glassware. Reactions were monitored using either thin-layer chromatography (TLC) or gas chromatography using an Agilent Technologies 7890A GC system equipped with an Agilent Technologies 5975C inert XL EI/CI MSD. Visualization of the developed plates was performed under UV light (254 nm) or KMnO<sub>4</sub> stain. Organic solutions were concentrated under reduced pressure on a Büchi rotary evaporator. Purification and isolation of products were performed via silica gel chromatography (both column and preparative thin-layer chromatography). Column chromatography was performed with Silicycle Silia-P Flash Silica Gel using glass columns. Reversed-phase high-performance liquid chromatography was carried out using an Agilent 1100 HPLC-MSD system consisting of a 6130B single quadrupole mass-selective detector (MSD), G1315B diode array detector, G2258A autosampler, two G1361A preparative pumps, one G1379A quaternary pump with degasser, one G1312A binary pump, and three G1364B fraction collectors from Agilent Technologies. System control and data analysis was performed using Agilent's ChemStation software, revision B.03.01-SR.1. A Waters XBridge C18 OBD Prep Column, 100 Å, 5 µm, 19 mm × 150 mm column was used as the stationary phase (Waters Corporation). Gradient elution was carried out using water and acetonitrile as the mobile phase. An aqueous 10% trifluoroacetic acid or 10% ammonium hydroxide solution was teed into the mobile phase as a modifier using a static mixer prior to the column, pumped at 1% of the total mobile phase flow rate. ESI mass-triggered fraction collected was employed using positive ion polarity scanning to monitor for the target mass. Aqueous fractions were concentrated using a SP Industries, Inc. Genevac HT-12 Series 3i instrument. Solvents were purchased from Fisher. <sup>1</sup>H, <sup>2</sup>H, and <sup>13</sup>C NMR spectra were recorded on Bruker CRYO500 or DRX400 spectrometer. <sup>1</sup>H NMR spectra were internally referenced to the residual solvent signal or TMS. <sup>13</sup>C NMR spectra were internally referenced to the residual solvent signal. Data for <sup>1</sup>H NMR are reported as follows: chemical shift (δ ppm), multiplicity (s = singlet, d = doublet, t = triplet, q = quartet, p = pentet, m = multiplet), coupling constant (Hz), integration. Data for <sup>2</sup>H and <sup>13</sup>C NMR are reported in terms of chemical shift (δ ppm). Infrared (IR) spectra were obtained on a Nicolet iS5 FT-IR spectrometer with an iD5 ATR and are reported in terms of frequency of absorption (cm<sup>-1</sup>). High resolution mass spectra (HRMS) were obtained on a micromass 70S-250 spectrometer (EI), an ABI/Sciex QStar Mass Spectrometer (ESI), or Waters LCT (TOF). Enantiomeric ratio for enantioselective reactions was determined by chiral SFC analysis using an Agilent Technologies HPLC (1200 series) system and Aurora A5 Fusion. 1,3-Dienes **2a-2l** were known compounds and synthesized according to reported methods.<sup>1,2</sup>

## 2. Optimization of the hydroamination of 1,3-diene (2a) with pyrazole (1a)

### (1) Rhodium precatalyst evaluation

In a N<sub>2</sub>-filled glovebox, an oven dried 1-dram vial equipped with a magnetic stir bar was charged with Rh pre-catalyst (10 mol%), ligand (10 mol%), PPTS (20 mol%) and toluene (0.45 mL). The resulting mixture was stirred for 10 mins and then 1,3-diene (0.2 mmol) followed by a solution of freshly recrystallized pyrazole (0.1 mmol) were added. The mixture was stirred at 80 °C and monitored by TLC or GCMS. Yields were obtained using <sup>1</sup>H NMR using trimethoxybenzene as an internal standard.

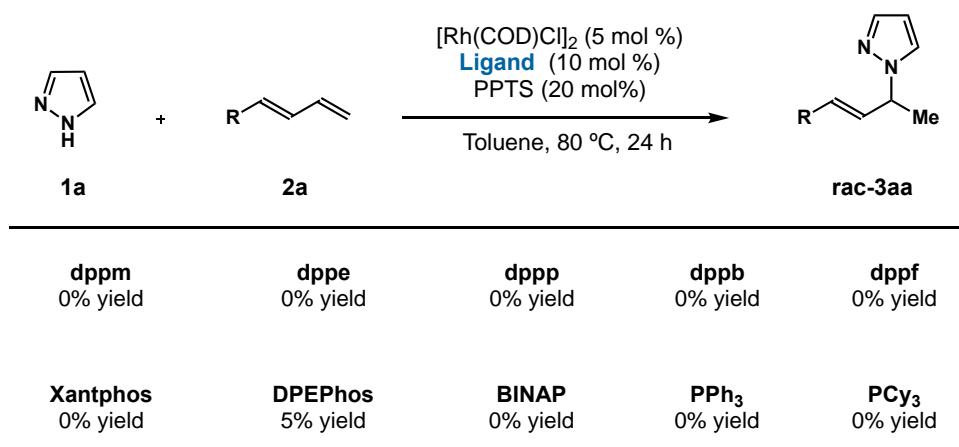

**Figure S1.** Achiral ligand evaluation with [Rh(COD)Cl]<sub>2</sub>.

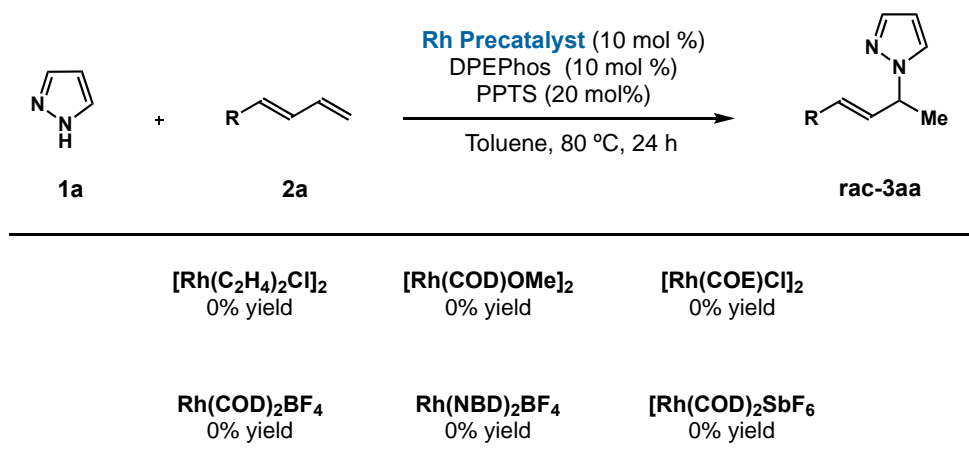

**Figure S2.** Rhodium pre-catalyst evaluation.

### (2) Palladium precatalyst evaluation

In a N<sub>2</sub>-filled glovebox, an oven dried 1-dram vial equipped with a magnetic stir bar was charged with Pd precatalyst (10 mol%), ligand (10-15 mol%) and CPME (0.45 mL). The resulting mixture was stirred for 10 mins and then 1,3-diene (0.2 mmol) followed by a solution of freshly recrystallized pyrazole (0.1 mmol) were added. The mixture was stirred at 23 °C and monitored by TLC or GCMS. Yields were obtained using <sup>1</sup>H NMR using trimethoxybenzene as an internal standard.

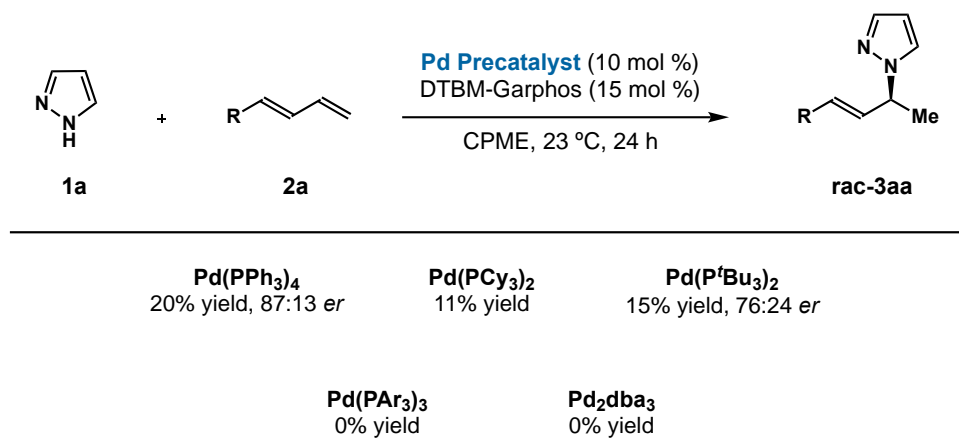

**Figure S3.** Pd(0) sources. Ar = 3,5-CF<sub>3</sub>-Ph.

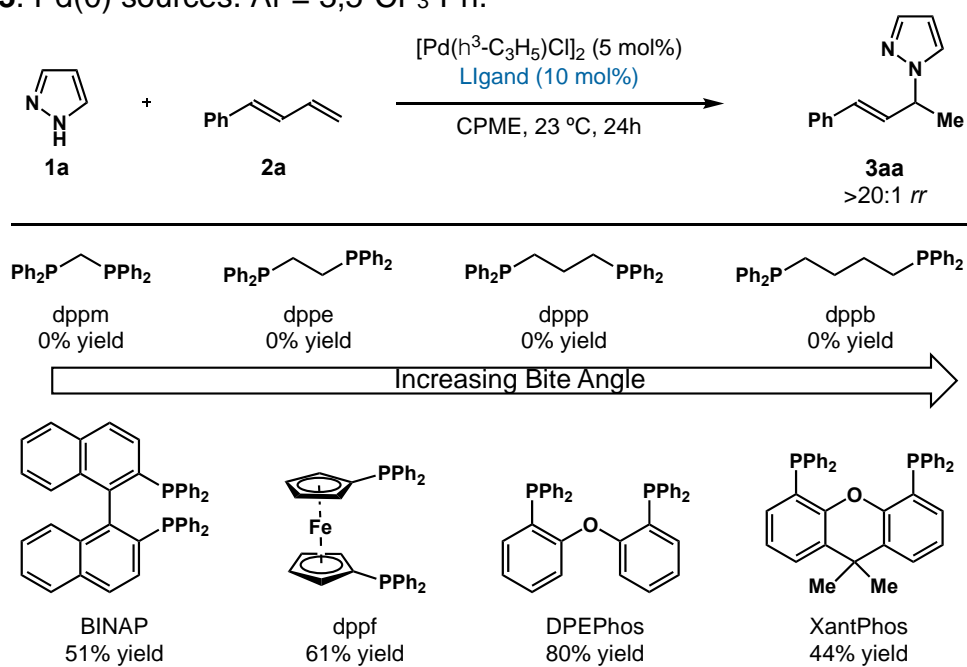

**Figure S4.** Achiral ligand screen with [Pd(η<sup>3</sup>-C<sub>3</sub>H<sub>5</sub>)Cl]<sub>2</sub>.



### 3. General procedure for the hydroamination of 1,3-dienes with azoles

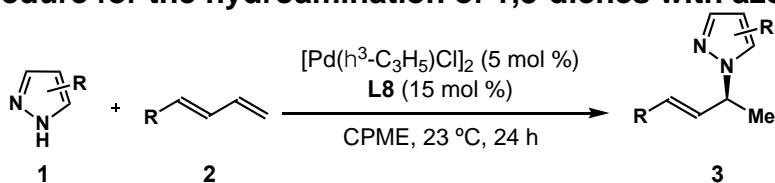

In a N<sub>2</sub>-filled glovebox, an oven dried 1-dram vial equipped with a magnetic stir bar was charged with [Pd(η<sup>3</sup>-C<sub>3</sub>H<sub>5</sub>)Cl]<sub>2</sub> (1.8 mg, 5.0 μmol), MeO-BIPHEP **L8** (16.4 mg, 15.0 μmol) and CPME (0.3 mL). The resulting mixture was stirred for 10 mins and then 1,3-diene (500.0 μmol) followed by a solution of freshly recrystallized pyrazole (100.0 μmol) in CPME (0.1 mL) were added dropwise. The mixture was removed from the glovebox and stirred at 23 °C until no starting material was observed by TLC or GCMS. Regioselectivity was determined by <sup>1</sup>H NMR analysis of the reaction prior to purification. Isolated yields (obtained by column chromatography or preparative thin-layer chromatography on silica gel using 10% EtOAc in Hexanes) of the title compounds are reported.

#### (*S*, *E*)-1-(4-phenylbut-3-en-2-yl)-1*H*-pyrazole (**3a**)

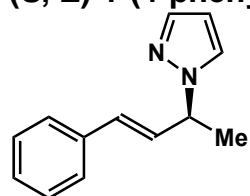

Colorless oil, 91% yield, 96:4 *er*, >20:1 *rr*, [α]<sub>D</sub><sup>24</sup> = -8.8 (*c* 0.62, CHCl<sub>3</sub>).

**<sup>1</sup>H NMR** (500 MHz, CDCl<sub>3</sub>) δ 7.56 (d, *J* = 1.4 Hz, 1H), 7.48 (d, *J* = 2.1 Hz, 1H), 7.39 – 7.35 (m, 2H), 7.33 – 7.28 (m, 2H), 7.27 – 7.22 (m, 1H), 6.49 (d, *J* = 16.0 Hz, 1H), 6.40 (dd, *J* = 16.0, 6.4 Hz, 1H), 6.29 (t, *J* = 2.1 Hz, 1H), 5.12 (apparent p, *J* = 6.4 Hz, 1H), 1.73 (d, *J* = 6.9 Hz, 3H).

**<sup>13</sup>C NMR** (126 MHz, CDCl<sub>3</sub>) δ 139.15, 136.35, 131.53, 129.80, 128.72,

128.10, 127.31, 125.55, 105.55, 59.49, 20.93. **IR** (ATR) 3026, 2977, 2925, 1735, 1599, 1509 cm<sup>-1</sup>. **HRMS** calculated for C<sub>13</sub>H<sub>14</sub>N<sub>2</sub> [M]<sup>+</sup> 198.1157, found 198.1158. **Chiral SFC**: 100 mm CHIRALCEL IC, 3.0% *i*PrOH, 3.0 mL/min, 254 nm, 44 °C, nozzle pressure = 200 bar CO<sub>2</sub>, *t*<sub>R1</sub> (minor) = 6.9 min, *t*<sub>R2</sub> (major) = 8.0 min.

#### (*S*, *E*)-4-methyl-1-(4-phenylbut-3-en-2-yl)-1*H*-pyrazole (**3b**)

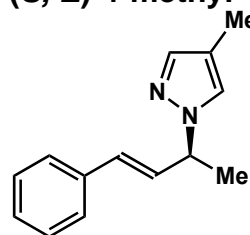

Colorless oil, 78% yield, 93:7 *er*, >20:1 *rr*, [α]<sub>D</sub><sup>24</sup> = -6.3 (*c* 1.5, CH<sub>2</sub>Cl<sub>2</sub>).

**<sup>1</sup>H NMR** (600 MHz, CDCl<sub>3</sub>) δ 7.37 (d, *J* = 7.7 Hz, 3H), 7.30 (t, *J* = 7.6 Hz, 2H), 7.24 (t, *J* = 8.1 Hz, 2H), 6.49 (d, *J* = 15.9 Hz, 1H), 6.38 (dd, *J* = 15.9, 6.6 Hz, 1H), 5.05 (apparent p, *J* = 6.7 Hz, 1H), 2.08 (s, 3H), 1.70 (d, *J* = 6.9 Hz, 3H). **<sup>13</sup>C NMR** (151 MHz, CDCl<sub>3</sub>) δ 139.19, 136.30,

131.34, 129.81, 128.62, 127.97, 126.64, 126.21, 116.06, 59.25, 20.75, 8.99. **IR** (ATR): 3026, 2978, 2932, 965, 752, 692, 624. **HRMS**

calculated for C<sub>14</sub>H<sub>16</sub>N<sub>2</sub>Na [M+Na]<sup>+</sup> 235.1209, found 235.1211. **Chiral SFC**: 150 mm CHIRALCEL AD-H, 10.0% *i*PrOH, 2.0 mL/min, 254 nm, 44 °C, nozzle pressure = 200 bar CO<sub>2</sub>, *t*<sub>R1</sub> (minor) = 3.3 min, *t*<sub>R2</sub> (major) = 3.7 min.

**(S, E)-1-(4-phenylbut-3-en-2-yl)-4-(4,4,5,5-tetramethyl-1,3,2-dioxaborolan-2-yl)-1H-pyrazole (3ac)**

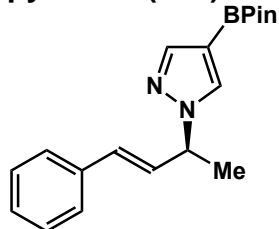

Separated using previously reported technique for boron-containing compounds.<sup>3</sup> Due to the nuclear quadrupole of the boron, the carbon directly bonded is not visible via  $^{13}\text{C}$  NMR. Colorless oil, 92% NMR yield, 36% isolated yield due to purification difficulties, 95:5 *er*, >20:1 *rr*,  $[\alpha]^{24}_{\text{D}} = -6.3$  (*c* 0.83,  $\text{CH}_2\text{Cl}_2$ ).  $^1\text{H}$  NMR (600 MHz,  $\text{CDCl}_3$ )  $\delta$  7.84 (s, 1H), 7.80 (s, 1H), 7.36 (d,  $J = 7.4$  Hz, 2H), 7.30 (t,  $J = 7.6$  Hz, 2H), 7.24 (t,  $J = 7.2$  Hz, 1H), 6.51 (d,  $J = 15.9$  Hz, 1H), 6.38 (dd,  $J = 15.9, 6.7$  Hz, 1H), 5.11 (apparent p,  $J = 6.8$  Hz, 1H), 1.72 (d,  $J = 6.9$  Hz, 3H), 1.31 (s, 12H).  $^{13}\text{C}$  NMR (151 MHz,  $\text{CDCl}_3$ )  $\delta$  145.34, 136.16, 134.20, 131.79, 129.24, 128.62, 128.05, 126.66, 83.33, 59.37, 24.83, 20.83. IR (ATR): 2977, 1553, 1246, 1142, 985, 856, 752, 691. HRMS calculated for  $\text{C}_{19}\text{H}_{25}\text{BN}_2\text{O}_2$   $[\text{M}]^+$  324.2013, found 324.1994. Chiral SFC: 150 mm CHIRALCEL OJ-H, 2.0% *i*PrOH, 2.0 mL/min, 254 nm, 44 °C, nozzle pressure = 200 bar  $\text{CO}_2$ ,  $t_{\text{R}1}$  (minor) = 3.1 min,  $t_{\text{R}2}$  (major) = 3.4 min.

**(S, E)-4-chloro-1-(4-phenylbut-3-en-2-yl)-1H-pyrazole (3ad)**

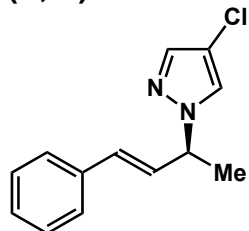

Colorless oil, 86% yield, 94:6 *er*, >20:1 *rr*,  $[\alpha]^{24}_{\text{D}} = -3.8$  (*c* 0.94,  $\text{CH}_2\text{Cl}_2$ ).  $^1\text{H}$  NMR (600 MHz,  $\text{CDCl}_3$ )  $\delta$  7.46 (d,  $J = 5.1$  Hz, 2H), 7.37 (d,  $J = 7.4$  Hz, 2H), 7.32 (t,  $J = 7.6$  Hz, 2H), 7.26 (t,  $J = 7.3$  Hz, 1H), 6.51 (d,  $J = 16.0$  Hz, 1H), 6.34 (dd,  $J = 16.0, 6.7$  Hz, 1H), 5.02 (apparent p,  $J = 6.7$  Hz, 1H), 1.70 (d,  $J = 6.9$  Hz, 3H).  $^{13}\text{C}$  NMR (151 MHz,  $\text{CDCl}_3$ )  $\delta$  137.50, 135.97, 132.07, 128.83, 128.70, 128.23, 126.69, 125.48, 109.88, 60.24, 20.56. IR (ATR): 3130, 2985, 1303, 965, 839, 752, 692, 612. HRMS calculated for  $\text{C}_{13}\text{H}_{13}\text{ClN}_2$   $[\text{M}]^+$  232.0767, found 232.0775. Chiral SFC: 150 mm CHIRALCEL OJ-H, 4.0% *i*PrOH, 2.0 mL/min, 254 nm, 44 °C, nozzle pressure = 200 bar  $\text{CO}_2$ ,  $t_{\text{R}1}$  (minor) = 3.1 min,  $t_{\text{R}2}$  (major) = 3.4 min.

**(S, E)-4-bromo-1-(4-phenylbut-3-en-2-yl)-1H-pyrazole (3ae)**

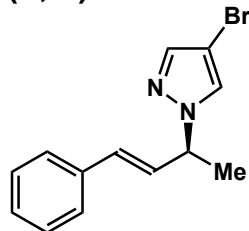

Colorless oil, 76% yield, 94:6 *er*, >20:1 *rr*,  $[\alpha]^{24}_{\text{D}} = -2.5$  (*c* 1.9,  $\text{CH}_2\text{Cl}_2$ ).  $^1\text{H}$  NMR (500 MHz,  $\text{CDCl}_3$ )  $\delta$  7.50 (d,  $J = 6.8$  Hz, 2H), 7.37 (d,  $J = 7.2$  Hz, 2H), 7.32 (t,  $J = 7.5$  Hz, 2H), 7.26 (t,  $J = 7.2$  Hz, 1H), 6.52 (d,  $J = 16.0$  Hz, 1H), 6.34 (dd,  $J = 16.0, 6.7$  Hz, 1H), 5.05 (apparent p,  $J = 6.8$  Hz, 1H), 1.71 (d,  $J = 6.9$  Hz, 3H).  $^{13}\text{C}$  NMR (126 MHz,  $\text{CDCl}_3$ )  $\delta$  139.65, 135.98, 132.12, 128.83, 128.70, 128.24, 127.62, 126.69, 93.00, 60.22, 20.61. IR (ATR): 3026, 2979, 1303, 969, 951, 840, 750, 691, 612. HRMS calculated for  $\text{C}_{13}\text{H}_{13}\text{BrN}_2$   $[\text{M}]^+$  276.0262, found 276.0250. Chiral SFC: 150 mm CHIRALCEL OJ-H, 2.0% *i*PrOH, 2.0 mL/min, 254 nm, 44 °C, nozzle pressure = 200 bar  $\text{CO}_2$ ,  $t_{\text{R}1}$  (minor) = 6.0 min,  $t_{\text{R}2}$  (major) = 6.4 min.

### Ethyl (S, E)-1-(4-phenylbut-3-en-2-yl)-1H-pyrazole-4-carboxylate (3af)

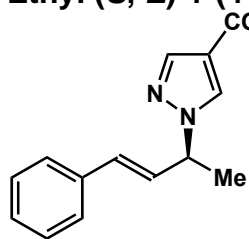

Colorless oil, 70% yield, 95:5 *er*, >20:1 *rr*,  $[\alpha]^{24}_D = -0.322$  (*c* 1.9, CH<sub>2</sub>Cl<sub>2</sub>). **<sup>1</sup>H NMR** (600 MHz, CDCl<sub>3</sub>)  $\delta$  7.96 (d, *J* = 14.1 Hz, 2H), 7.38 (d, *J* = 7.4 Hz, 2H), 7.32 (t, *J* = 7.6 Hz, 2H), 7.26 (t, *J* = 7.3 Hz, 1H), 6.54 (d, *J* = 15.9 Hz, 1H), 6.36 (dd, *J* = 15.9, 6.8 Hz, 1H), 5.10 (dd, *J* = 13.5, 6.8 Hz, 1H), 4.29 (q, *J* = 7.1 Hz, 2H), 1.74 (d, *J* = 6.9 Hz, 3H), 1.34 (t, *J* = 7.1 Hz, 3H). **<sup>13</sup>C NMR** (151 MHz, CDCl<sub>3</sub>)  $\delta$  163.16, 140.94, 135.87, 132.43, 130.78, 128.71, 128.40, 128.30, 126.71, 115.05, 60.21, 60.07, 20.72, 14.45. **IR** (ATR): 2980, 1711, 1551, 1227, 1205, 1174, 1025, 970, 767, 751, 692. **HRMS** calculated for C<sub>16</sub>H<sub>18</sub>N<sub>2</sub>O<sub>2</sub> [M]<sup>+</sup> 270.1368, found 270.1380. **Chiral SFC**: 150 mm CHIRALCEL AD-H, 5.0% *i*PrOH, 2.0 mL/min, 254 nm, 44 °C, nozzle pressure = 200 bar CO<sub>2</sub>, *t*<sub>R1</sub> (minor) = 7.2 min, *t*<sub>R2</sub> (major) = 8.7 min.

### (S, E)-1-(4-phenylbut-3-en-2-yl)-4-(trifluoromethyl)-1H-pyrazole (3ag)

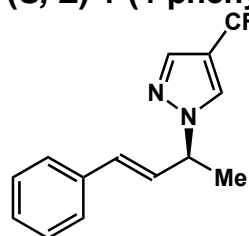

Colorless oil, 73% yield, 92:8 *er*, >20:1 *rr*,  $[\alpha]^{24}_D = -6.3$  (*c* 1.6, CH<sub>2</sub>Cl<sub>2</sub>). **<sup>1</sup>H NMR** (500 MHz, CDCl<sub>3</sub>)  $\delta$  7.76 (s, 2H), 7.40 (d, *J* = 7.3 Hz, 2H), 7.34 (t, *J* = 7.4 Hz, 2H), 7.28 (t, *J* = 7.2 Hz, 1H), 6.57 (d, *J* = 16.0 Hz, 1H), 6.37 (dd, *J* = 16.0, 6.9 Hz, 1H), 5.10 (apparent p, *J* = 6.8 Hz, 1H), 1.75 (d, *J* = 6.9 Hz, 3H). **<sup>13</sup>C NMR** (126 MHz, CDCl<sub>3</sub>)  $\delta$  136.87 (q, *J* = 2.6 Hz), 135.75, 132.62, 128.77, 128.42, 128.22, 126.78, 126.74, 122.74 (q, *J* = 265.9 Hz), 113.46 (q, *J* = 38.2 Hz), 60.22, 20.76. **IR** (ATR): 2984, 1574, 1184, 1112, 966, 752, 692, 682. **HRMS** calculated for C<sub>14</sub>H<sub>13</sub>F<sub>3</sub>N<sub>2</sub> [M]<sup>+</sup> 266.1031, found 266.1040. **Chiral SFC**: 150 mm CHIRALCEL OD-H, 1.0% *i*PrOH, 1.5 mL/min, 254 nm, 44 °C, nozzle pressure = 200 bar CO<sub>2</sub>, *t*<sub>R1</sub> (major) = 3.9 min, *t*<sub>R2</sub> (minor) = 4.4 min.

### (S, E)-1-(4-phenylbut-3-en-2-yl)-1H-pyrazole-4-carbonitrile (3ah)

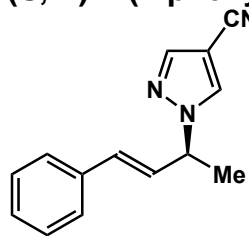

Colorless oil, 64% yield, 88:12 *er*, >20:1 *rr*,  $[\alpha]^{24}_D = -8.9$  (*c* 0.99, CH<sub>2</sub>Cl<sub>2</sub>). **<sup>1</sup>H NMR** (500 MHz, CDCl<sub>3</sub>)  $\delta$  7.90 (s, 1H), 7.84 (s, 1H), 7.38 (d, *J* = 7.2 Hz, 2H), 7.34 (t, *J* = 7.3 Hz, 2H), 7.29 (t, *J* = 7.1 Hz, 1H), 6.57 (d, *J* = 16.0 Hz, 1H), 6.34 (dd, *J* = 16.0, 6.9 Hz, 1H), 5.11 (apparent p, *J* = 6.9 Hz, 1H), 1.75 (d, *J* = 6.9 Hz, 3H). **<sup>13</sup>C NMR** (126 MHz, CDCl<sub>3</sub>)  $\delta$  142.28, 135.51, 133.15, 132.62, 128.82, 128.59, 127.52, 126.76, 113.65, 92.17, 60.66, 20.73. **IR** (ATR): 3136, 2924, 2236, 1541, 1354, 1149, 968, 876, 754, 693, 632. **HRMS** calculated for C<sub>14</sub>H<sub>13</sub>N<sub>3</sub> [M]<sup>+</sup> 223.1109, found 223.1117. **Chiral SFC**: 150 mm CHIRALCEL OD-H, 1.0% *i*PrOH, 1.5 mL/min, 254 nm, 44 °C, nozzle pressure = 200 bar CO<sub>2</sub>, *t*<sub>R1</sub> (major) = 26.0 min, *t*<sub>R2</sub> (minor) = 28.9 min.

### (S, E)-3,5-dimethyl-1-(4-phenylbut-3-en-2-yl)-1H-pyrazole (3ai)

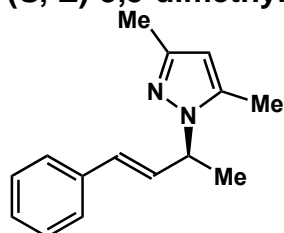

Colorless oil, 69% yield, 89:11 *er*, >20:1 *rr*,  $[\alpha]^{24}_D = +26.1$  (*c* 0.15, CH<sub>2</sub>Cl<sub>2</sub>). **<sup>1</sup>H NMR** (600 MHz, CDCl<sub>3</sub>)  $\delta$  7.35 (d, *J* = 7.5 Hz, 2H), 7.29 (t, *J* = 7.6 Hz, 2H), 7.22 (t, *J* = 7.3 Hz, 1H), 6.42 (dd, *J* = 16.0, 6.5 Hz, 1H), 6.32 (d, *J* = 16.0 Hz, 1H), 5.82 (s, 1H), 4.94 (apparent p, *J* = 6.7 Hz, 1H), 2.27 (d, *J* = 4.5 Hz, 6H), 1.72 (d, *J* = 6.9 Hz, 3H). **<sup>13</sup>C NMR** (151 MHz, CDCl<sub>3</sub>)  $\delta$  147.29, 138.65, 136.47, 130.41, 130.29,

128.55, 127.75, 126.59, 105.34, 55.93, 20.62, 13.62, 11.24. **IR** (ATR): 3026, 2979, 2931, 1552, 1448, 1419, 965, 777, 748, 693. **HRMS** calculated for C<sub>15</sub>H<sub>18</sub>N<sub>2</sub>Na [M+Na]<sup>+</sup> 249.1368, found 249.1367. **Chiral SFC**: 150 mm CHIRALCEL AD-H, 5.0% *i*PrOH, 2.0 mL/min, 254 nm, 44 °C, nozzle pressure = 200 bar CO<sub>2</sub>, t<sub>R1</sub> (minor) = 2.9 min, t<sub>R2</sub> (major) = 4.5 min.

**(S, Z)-4-bromo-3,5-dimethyl-1-(4-phenylbut-3-en-2-yl)-1H-pyrazole (3aj)**

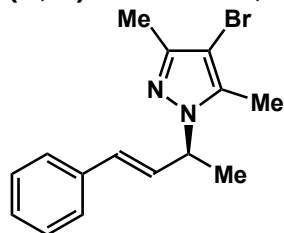

Colorless oil, 29% yield, 97:3 *er*, >20:1 *rr*, [α]<sub>D</sub><sup>24</sup> = -42.4 (c 0.755, CH<sub>2</sub>Cl<sub>2</sub>). **<sup>1</sup>H NMR** (500 MHz, CDCl<sub>3</sub>) δ 7.34 (d, *J* = 7.4 Hz, 2H), 7.29 (t, *J* = 7.6 Hz, 2H), 7.23 (t, *J* = 7.2 Hz, 1H), 6.42 – 6.28 (m, 2H), 4.95 (dq, *J* = 6.9, 4.5 Hz, 1H), 2.26 (d, *J* = 10.6 Hz, 6H), 1.70 (d, *J* = 6.9 Hz, 3H). **<sup>13</sup>C NMR** (126 MHz, CDCl<sub>3</sub>) δ 145.91, 136.66, 136.22, 130.61, 129.82, 128.63, 127.94, 126.60, 94.38, 57.12, 20.38, 12.54, 10.49. **IR** (ATR): 3029, 2983, 2919, 1057, 966, 756, 695. **HRMS** calculated for C<sub>15</sub>H<sub>17</sub>BrN<sub>2</sub> [M]<sup>+</sup> 304.0575, found 304.0574. **Chiral SFC**: 150 mm CHIRALCEL AD-H, 10.0% *i*PrOH, 2.0 mL/min, 254 nm, 44 °C, nozzle pressure = 200 bar CO<sub>2</sub>, t<sub>R1</sub> (minor) = 1.9 min, t<sub>R2</sub> (major) = 2.1 min.

**(S, E)-3-methyl-1-(4-phenylbut-3-en-2-yl)-1H-pyrazole (3ak)**

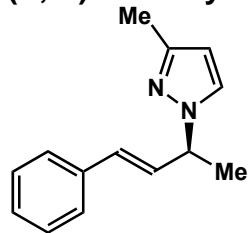

Colorless oil, 89% yield, 93:7 *er*, >20:1 *rr*, 11:1 *N*<sup>1</sup>:*N*<sup>2</sup>, [α]<sub>D</sub><sup>24</sup> = -17.2 (c 0.12, CH<sub>2</sub>Cl<sub>2</sub>). **<sup>1</sup>H NMR** (600 MHz, CDCl<sub>3</sub>) δ 7.37 (d, *J* = 7.8 Hz, 3H), 7.30 (t, *J* = 7.8 Hz, 2H), 7.24 (t, *J* = 7.3 Hz, 1H), 6.49 (d, *J* = 16.0 Hz, 1H), 6.38 (dd, *J* = 16.0, 6.5 Hz, 1H), 6.05 (d, *J* = 2.1 Hz, 1H), 5.05 (apparent p, *J* = 6.8 Hz, 1H), 2.32 (s, 3H), 1.70 (d, *J* = 6.9 Hz, 3H). **<sup>13</sup>C NMR** (151 MHz, CDCl<sub>3</sub>) δ 148.19, 136.33, 131.35, 129.79, 128.62, 127.96, 127.92, 126.64, 105.08, 59.13, 20.84, 13.61. **IR** (ATR): 2979, 2929, 1520, 1447, 1199, 1051, 983, 964, 749, 692. **HRMS** calculated for C<sub>14</sub>H<sub>16</sub>N<sub>2</sub> [M]<sup>+</sup> 121.1313, found 121.1319. **Chiral SFC**: 150 mm CHIRALCEL AD-H, 10.0% *i*PrOH, 2.0 mL/min, 254 nm, 44 °C, nozzle pressure = 200 bar CO<sub>2</sub>, t<sub>R1</sub> (minor) = 1.7 min, t<sub>R2</sub> (major) = 2.1 min.

**(S, E)-3-phenyl-1-(4-phenylbut-3-en-2-yl)-1H-pyrazole (3al)**

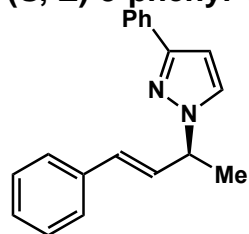

Colorless oil, 83% yield, 94:6 *er*, >20:1 *rr*, >20:1 *N*<sup>1</sup>:*N*<sup>2</sup>, [α]<sub>D</sub><sup>24</sup> = -15.5 (c 2.0, CH<sub>2</sub>Cl<sub>2</sub>). **<sup>1</sup>H NMR** (600 MHz, CDCl<sub>3</sub>) δ 7.85 (d, *J* = 8.0 Hz, 2H), 7.50 (s, 1H), 7.40 (t, *J* = 8.1 Hz, 4H), 7.31 (m, 3H), 7.26 (t, *J* = 7.1 Hz, 1H), 6.59 (s, 1H), 6.54 (d, *J* = 16.0 Hz, 1H), 6.46 (dd, *J* = 16.0, 6.2 Hz, 1H), 5.17 (apparent p, *J* = 6.7 Hz, 1H), 1.78 (d, *J* = 6.9 Hz, 3H). **<sup>13</sup>C NMR** δ 151.14, 136.33, 133.81, 131.42, 129.77, 128.66, 128.62, 128.44, 128.01, 127.52, 126.66, 125.71, 102.83, 59.57, 20.93. **IR** (ATR): 3027, 2978, 2932, 1496, 1457, 964, 747, 691. **HRMS** calculated for C<sub>19</sub>H<sub>18</sub>N<sub>2</sub>Na [M+Na]<sup>+</sup> 297.1368, found 297.1368. **Chiral SFC**: 150 mm CHIRALCEL OJ-H, 10.0% *i*PrOH, 2.0 mL/min, 254 nm, 44 °C, nozzle pressure = 200 bar CO<sub>2</sub>, t<sub>R1</sub> (major) = 11.729 min, t<sub>R2</sub> (minor) = 14.144 min.

**(S, E)-4-bromo-5-methyl-1-(4-phenylbut-3-en-2-yl)-1H-pyrazole (3am)**

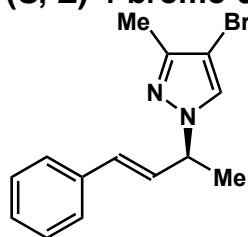

Colorless oil, 82% yield, 93:7 *er*, >20:1 *rr*, >20:1 *N*<sup>1</sup>:*N*<sup>2</sup>, [ $\alpha$ ]<sub>D</sub><sup>24</sup> = -3.6 (*c* 2.1, CH<sub>2</sub>Cl<sub>2</sub>). **<sup>1</sup>H NMR** (500 MHz, CDCl<sub>3</sub>)  $\delta$  7.41 (s, 1H), 7.37 (d, *J* = 7.6 Hz, 2H), 7.31 (t, *J* = 7.5 Hz, 2H), 7.25 (t, *J* = 7.2 Hz, 1H), 6.51 (d, *J* = 16.0 Hz, 1H), 6.33 (dd, *J* = 16.0, 6.6 Hz, 1H), 4.97 (apparent p, *J* = 6.8 Hz, 1H), 2.26 (s, 3H), 1.68 (d, *J* = 7.0 Hz, 3H). **<sup>13</sup>C NMR** (126 MHz, CDCl<sub>3</sub>)  $\delta$  147.07, 136.09, 131.86, 129.11, 128.67, 128.14, 127.86, 126.67, 93.56, 59.91, 20.64, 12.02. **IR** (ATR): 3026, 2979, 2928, 1151, 1056, 963, 752, 692. **HRMS** calculated for C<sub>14</sub>H<sub>15</sub>BrN<sub>2</sub> [M]<sup>+</sup> 290.0419, found 290.0421. **Chiral SFC**: 150 mm CHIRALCEL AD-H, 5.0 % *i*PrOH, 2.0 mL/min, 254 nm, 44 °C, nozzle pressure = 200 bar CO<sub>2</sub>, *t*<sub>R1</sub> (minor) = 3.792 min, *t*<sub>R2</sub> (major) = 4.311 min.

**(S, E)-2-(4-phenylbut-3-en-2-yl)-2H-1,2,3-triazole (3an)**

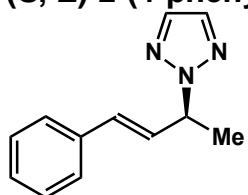

White crystalline solid, 70% yield, 91:9 *er*, >20:1 *rr*, >20:1 *N*<sup>2</sup>:*N*<sup>1</sup>. **<sup>1</sup>H NMR** (600 MHz, CDCl<sub>3</sub>)  $\delta$  7.63 (s, 2H), 7.37 (m, 2H), 7.30 (m, 2H), 7.24 (m, 1H), 6.55 (d, *J* = 16.0 Hz, 1H), 6.46 (dd, *J* = 16.0, 7.1 Hz, 1H), 5.44 (dp, *J* = 6.9, 0.6 Hz, 1H), 1.80 (d, *J* = 6.9 Hz, 3H). **<sup>13</sup>C NMR** (151 MHz, CDCl<sub>3</sub>)  $\delta$  136.11, 133.96, 132.01, 128.61, 128.59, 128.08, 126.71, 62.89, 20.72. **IR** (ATR): 3026, 2984, 2935, 1332, 961, 815, 751, 691. **HRMS** calculated for C<sub>12</sub>H<sub>14</sub>N<sub>3</sub>H [M+H]<sup>+</sup> 200.1188, found 200.1190. **Chiral SFC**: 150 mm CHIRALCEL AD-H, 5.0% *i*PrOH, 2.0 mL/min, 254 nm, 44 °C, nozzle pressure = 200 bar CO<sub>2</sub>, *t*<sub>R1</sub> (minor) = 2.118 min, *t*<sub>R2</sub> (major) = 2.654 min.

**(S, E)-2-(4-phenylbut-3-en-2-yl)-2H-benzo[d][1,2,3]triazole (3ao)**

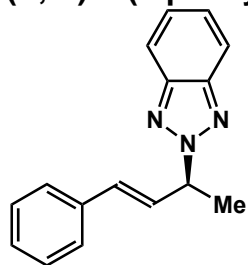

White crystalline solid, 85% yield, 52:48 *er*, >20:1 *rr*, 1.2:1 *N*<sup>2</sup>:*N*<sup>1</sup>. **<sup>1</sup>H NMR** (500 MHz, CDCl<sub>3</sub>)  $\delta$  7.89 (dd, *J* = 6.5, 3.1 Hz, 2H), 7.44 – 7.34 (m, 4H), 7.30 (t, *J* = 7.5 Hz, 2H), 7.27 – 7.21 (m, 1H), 6.68 (d, *J* = 16.0 Hz, 1H), 6.60 (dd, *J* = 16.0, 7.1 Hz, 1H), 5.72 (apparent p, *J* = 6.9 Hz, 1H), 1.95 (d, *J* = 6.9 Hz, 3H). **<sup>13</sup>C NMR** (126 MHz, CDCl<sub>3</sub>)  $\delta$  144.20, 135.95, 132.74, 128.63, 128.23, 128.19, 126.80, 126.29, 118.16, 64.83, 21.20. **IR** (ATR): 2985, 2933, 1269, 1038, 975, 748, 692. **HRMS** calculated for C<sub>16</sub>H<sub>15</sub>N<sub>3</sub> [M]<sup>+</sup> 249.1266, found 249.1277. **Chiral SFC**: 150 mm CHIRALCEL AD-H, 10.0% *i*PrOH, 2.0 mL/min, 254 nm, 44 °C, nozzle pressure = 200 bar CO<sub>2</sub>, *t*<sub>R1</sub> (minor) = 3.216 min, *t*<sub>R2</sub> (major) = 4.245 min.

**(S, E)-2-(4-phenylbut-3-en-2-yl)-2H-indazole (3ap)**

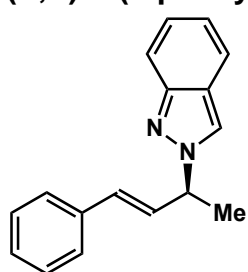

White crystalline solid, 69% yield, 65:35 *er*, >20:1 *rr*, 1.2:1 *N*<sup>1</sup>:*N*<sup>2</sup>. [ $\alpha$ ]<sub>D</sub><sup>24</sup> = -3.5 (*c* 0.75, CH<sub>2</sub>Cl<sub>2</sub>). **<sup>1</sup>H NMR** (500 MHz, CDCl<sub>3</sub>)  $\delta$  8.01 (s, 1H), 7.76 (d, *J* = 8.8 Hz, 1H), 7.66 (d, *J* = 8.4 Hz, 1H), 7.39 (d, *J* = 7.2 Hz, 2H), 7.36 – 7.22 (m, 4H), 7.09 (dd, *J* = 7.9, 7.2 Hz, 1H), 6.60 (d, *J* = 16.0 Hz, 1H), 6.53 (dd, *J* = 15.9, 6.4 Hz, 1H), 5.39 (apparent p, *J* = 6.7 Hz, 1H), 1.88 (d, *J* = 6.9 Hz, 3H). **<sup>13</sup>C NMR** (126 MHz, CDCl<sub>3</sub>)  $\delta$  148.66, 136.06, 132.15, 129.07, 128.68, 128.20, 126.73, 125.89, 121.75, 121.68, 120.85, 120.24, 117.64, 61.10, 21.29. **IR** (ATR): 3117, 2924, 1154, 1126, 963, 788, 753, 739, 698. **HRMS** calculated for C<sub>17</sub>H<sub>16</sub>N<sub>2</sub> [M]<sup>+</sup> 248.1313, found

248.1306. **Chiral SFC:** 150 mm CHIRALCEL AD-H, 15.0% *i*PrOH, 2.0 mL/min, 254 nm, 44 °C, nozzle pressure = 200 bar CO<sub>2</sub>, *t*<sub>R1</sub> (minor) = 5.2 min, *t*<sub>R2</sub> (major) = 6.9 min.

**(S, E)-2-butyl-1-(4-phenylbut-3-en-2-yl)-1H-imidazole (3aq)**

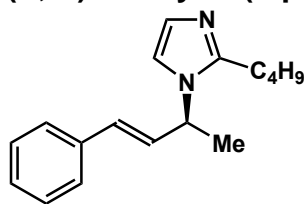

Off-white crystalline solid (isolated as trifluoroacetic acid salt) obtained by preparative HPLC (reverse phase C18, acetonitrile/water with 0.1% trifluoroacetic acid modifier), 76% yield, 70:30 *er*, >20:1 *rr*. **<sup>1</sup>H NMR** (600 MHz, CD<sub>3</sub>CN) δ 7.43 (s, 1H), 7.42 (s, 1H), 7.38 – 7.37 (m, 1H), 7.36 – 7.35 (m, 1H), 7.35 (s, 1H), 7.34 (s, 1H), 7.31 – 7.28 (m, 1H), 6.56 (d, *J* = 16.1 Hz, 1H), 6.41 (dd, *J* = 16.0, 6.1 Hz, 1H), 5.21 (p, *J* = 6.1 Hz, 1H), 3.03 (td, *J* = 7.4, 1.8 Hz, 2H), 1.73 (p, *J* = 7.7 Hz, 2H), 1.68 (d, *J* = 6.9 Hz, 3H), 1.38 (h, *J* = 7.2 Hz, 2H), 0.90 (t, *J* = 7.4 Hz, 3H). **<sup>13</sup>C NMR** (151 MHz, CD<sub>3</sub>CN) δ 161.36 (q, *J* = 34.1 Hz), 148.14, 136.77, 133.27, 129.71, 129.34, 128.43, 127.59, 119.97, 119.43, 117.94 (q, *J* = 293.7 Hz), 55.70, 29.93, 25.18, 22.76, 20.85, 13.74. **LRMS** calculated for C<sub>17</sub>H<sub>23</sub>N<sub>2</sub> [*M*+*H*]<sup>+</sup> 255, found 255. **Chiral SFC:** 100 mm Lux-2, 30% MeOH with 0.1% NH<sub>4</sub>OH, 3.5 mL/min, outlet pressure = 138 bar, *t*<sub>R1</sub> (minor) = 0.69 min, *t*<sub>R2</sub> (major) = 0.78 min.

**(S, E)-1-(4-(4-methoxyphenyl)but-3-en-2-yl)-1H-pyrazole (3ba)**

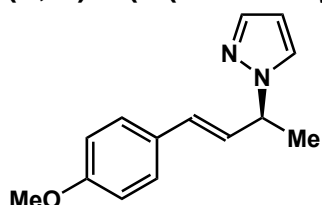

White solid, 82% yield, 96:4 *er*, >20:1 *rr*, [*α*]<sub>D</sub><sup>24</sup> = -53.7 (c 0.19, CHCl<sub>3</sub>). **<sup>1</sup>H NMR** (500 MHz, CDCl<sub>3</sub>) δ 7.55 (d, *J* = 1.8 Hz, 1H), 7.47 (d, *J* = 2.3 Hz, 1H), 7.33 – 7.28 (m, 2H), 6.87 – 6.82 (m, 2H), 6.44 (d, *J* = 16.0 Hz, 1H), 6.30 – 6.23 (m, 2H), 5.08 (apparent p, *J* = 6.8 Hz, 1H), 3.80 (s, 3H), 1.71 (d, *J* = 6.9 Hz, 3H). **<sup>13</sup>C NMR** (126 MHz, CDCl<sub>3</sub>) δ 159.60, 139.12, 130.96, 129.11, 127.92, 127.62, 127.20, 114.12, 105.42, 59.55, 55.42, 21.03. **IR** (ATR) 2982, 2933, 2836, 1734, 1672, 1610, 1510 cm<sup>-1</sup>. **HRMS** calculated for C<sub>14</sub>H<sub>16</sub>N<sub>2</sub>ONa [*M*+*Na*]<sup>+</sup> 251.1160, found 251.1170. **Chiral SFC:** 100 mm CHIRALCEL AD-H, 8.0% *i*PrOH, 2.0 mL/min, 254 nm, 44 °C, nozzle pressure = 200 bar CO<sub>2</sub>, *t*<sub>R1</sub> (minor) = 3.4 min, *t*<sub>R2</sub> (major) = 4.2 min.

**(S, E)-1-(4-(*p*-tolyl)but-3-en-2-yl)-1H-pyrazole (3ca)**

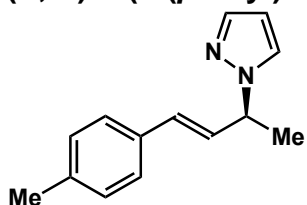

Colorless oil, 92% yield, 93:7 *er*, >20:1 *rr*, [*α*]<sub>D</sub><sup>24</sup> = -16.8 (c 0.60, CHCl<sub>3</sub>). **<sup>1</sup>H NMR** (500 MHz, CDCl<sub>3</sub>) δ 7.56 (d, *J* = 1.4 Hz, 1H), 7.47 (d, *J* = 2.2 Hz, 1H), 7.27 (d, *J* = 8.0 Hz, 2H), 7.12 (d, *J* = 8.0 Hz, 2H), 6.47 (d, *J* = 16.0 Hz, 1H), 6.35 (dd, *J* = 16.0, 6.6 Hz, 1H), 6.28 (t, *J* = 2.0 Hz, 1H), 5.10 (apparent p, *J* = 6.7 Hz, 1H), 2.33 (s, 3H), 1.72 (d, *J* = 6.9 Hz, 3H). **<sup>13</sup>C NMR** (125 MHz, CDCl<sub>3</sub>) δ 139.13, 137.96, 133.56, 131.39, 129.41, 128.77, 127.24, 126.62, 105.46, 59.52, 21.34, 20.98. **IR** (ATR) 3027, 2978, 2923, 2864, 1512, 1396, 801, 751 cm<sup>-1</sup>. **HRMS** calculated for C<sub>14</sub>H<sub>16</sub>N<sub>2</sub>Na [*M*+*Na*]<sup>+</sup> 235.1211, found 235.1218. **Chiral SFC:** 100 mm CHIRALCEL AD-H, 8.0% *i*PrOH, 2.0 mL/min, 254 nm, 44 °C, nozzle pressure = 200 bar CO<sub>2</sub>, *t*<sub>R1</sub> (minor) = 3.3 min, *t*<sub>R2</sub> (major) = 4.0 min.

**(S, E)-1-(4-(4-chlorophenyl)but-3-en-2-yl)-1H-pyrazole (3da)**

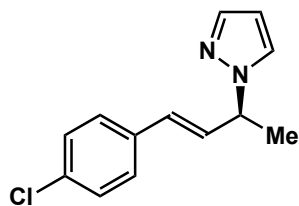

Colorless oil, 31% yield, 89:11 *er*, >20:1 *rr*,  $[\alpha]^{24}_{\text{D}} = -25.5$  (*c* 0.06,  $\text{CHCl}_3$ ).  $^1\text{H NMR}$  (500 MHz,  $\text{CDCl}_3$ )  $\delta$  7.54 (d,  $J = 1.7$  Hz, 1H), 7.45 (d,  $J = 2.3$  Hz, 1H), 7.28 – 7.23 (m, 4H), 6.43 – 6.32 (m, 2H), 6.31 – 6.26 (m, 1H), 5.09 (apparent p,  $J = 6.9$  Hz, 1H), 1.71 (d,  $J = 6.9$  Hz, 3H).  $^{13}\text{C NMR}$  (126 MHz,  $\text{CDCl}_3$ )  $\delta$  139.23, 134.85, 133.73, 130.55, 130.20, 128.87, 127.93, 127.33, 105.61, 59.35, 20.83. **IR** (ATR) 2980, 2933, 1683, 1593, 808, 748  $\text{cm}^{-1}$ . **HRMS** calculated for  $\text{C}_{13}\text{H}_{14}\text{N}_2\text{Cl}$   $[\text{M}+\text{H}]^+$  233.0845, found 233.0836. **Chiral SFC**: 100 mm CHIRALCEL AD-H, 4.0% *i*PrOH, 3.0 mL/min, 254 nm, 44 °C, nozzle pressure = 200 bar  $\text{CO}_2$ ,  $t_{\text{R}1}$  (minor) = 7.4 min,  $t_{\text{R}2}$  (major) = 9.8 min.

### **(S, E)-1-(4-(4-fluorophenyl)but-3-en-2-yl)-1H-pyrazole (3ea)**

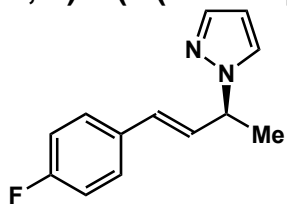

Colorless oil, 93% yield, 94:6 *er*, >20:1 *rr*,  $[\alpha]^{24}_{\text{D}} = -5.4$  (*c* 0.64,  $\text{CHCl}_3$ ).  $^1\text{H NMR}$  (500 MHz,  $\text{CDCl}_3$ )  $\delta$  7.56 (d,  $J = 1.8$  Hz, 1H), 7.47 (d,  $J = 2.3$  Hz, 1H), 7.35 – 7.33 (m, 2H), 7.02 – 6.96 (m, 2H), 6.43 (d,  $J = 16.0$  Hz, 1H), 6.34 – 6.27 (m, 2H), 5.14 – 5.07 (m, 1H), 1.72 (d,  $J = 6.9$  Hz, 3H).  $^{13}\text{C NMR}$  (126 MHz,  $\text{CDCl}_3$ )  $\delta$  162.63 (d,  $J = 247.4$  Hz), 139.19, 132.51 (d,  $J = 3.4$  Hz), 130.29, 129.62 (d,  $J = 2.3$  Hz), 128.27 (d,  $J = 8.0$  Hz), 127.30, 115.64 (d,  $J = 21.7$  Hz), 105.57, 59.40, 20.90. **IR** (ATR) 2981, 2933, 1682, 1601, 1512, 1230  $\text{cm}^{-1}$ . **HRMS** calculated for  $\text{C}_{13}\text{H}_{14}\text{N}_2\text{F}$   $[\text{M}+\text{H}]^+$  217.1141, found 217.1135. **Chiral SFC**: 100 mm CHIRALCEL IC, 3.0% *i*PrOH, 3.0 mL/min, 254 nm, 44 °C, nozzle pressure = 200 bar  $\text{CO}_2$ ,  $t_{\text{R}1}$  (minor) = 5.1 min,  $t_{\text{R}2}$  (major) = 6.0 min.

### **(S, E)-1-(4-(3-methoxyphenyl)but-3-en-2-yl)-1H-pyrazole (3fa)**

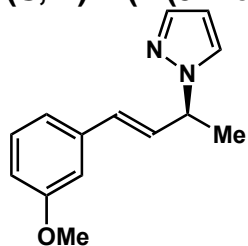

Colorless oil, 79% yield, 91:9 *er*, >20:1 *rr*,  $[\alpha]^{24}_{\text{D}} = -5.0$  (*c* 0.60,  $\text{CHCl}_3$ ).  $^1\text{H NMR}$  (500 MHz,  $\text{CDCl}_3$ )  $\delta$  7.56 (d,  $J = 1.3$  Hz, 1H), 7.48 (d,  $J = 2.1$  Hz, 1H), 7.22 (t,  $J = 7.9$  Hz, 1H), 6.96 (d,  $J = 7.7$  Hz, 1H), 6.91 – 6.89 (m, 1H), 6.80 (dd,  $J = 8.2, 2.5$  Hz, 1H), 6.46 (d,  $J = 16.0$  Hz, 1H), 6.39 (dd,  $J = 16.0, 6.2$  Hz, 1H), 6.29 (t,  $J = 2.1$  Hz, 1H), 5.12 (apparent p,  $J = 6.6$  Hz, 1H), 3.80 (s, 3H), 1.73 (d,  $J = 6.9$  Hz, 3H).  $^{13}\text{C NMR}$  (126 MHz,  $\text{CDCl}_3$ )  $\delta$  159.96, 139.13, 137.79, 131.45, 130.08, 129.71, 127.35, 119.43, 113.89, 111.92, 105.57, 59.46, 55.39, 20.92. **IR** (ATR) 2982, 2935, 2835, 1600, 1579, 1288  $\text{cm}^{-1}$ . **HRMS** calculated for  $\text{C}_{14}\text{H}_{16}\text{N}_2\text{ONa}$   $[\text{M}+\text{Na}]^+$  251.1160, found 251.1167. **Chiral SFC**: 100 mm CHIRALCEL AD-H, 8.0% *i*PrOH, 2.0 mL/min, 254 nm, 44 °C, nozzle pressure = 200 bar  $\text{CO}_2$ ,  $t_{\text{R}1}$  (minor) = 3.4 min,  $t_{\text{R}2}$  (major) = 4.0 min.

### **(S, E)-1-(4-(*m*-tolyl)but-3-en-2-yl)-1H-pyrazole (3ga)**

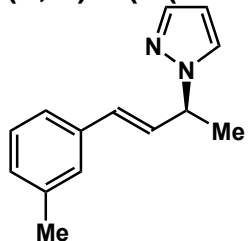

Colorless oil, 87% yield, 95:5 *er*, >20:1 *rr*,  $[\alpha]^{24}_{\text{D}} = -11.1$  (*c* 0.69,  $\text{CHCl}_3$ ).  $^1\text{H NMR}$  (500 MHz,  $\text{CDCl}_3$ )  $\delta$  7.56 (d,  $J = 1.2$  Hz, 1H), 7.47 (d,  $J = 2.3$  Hz, 1H), 7.18 (dd,  $J = 13.0, 7.2$  Hz, 3H), 7.06 (d,  $J = 7.2$  Hz, 1H), 6.46 (d,  $J = 16.0$  Hz, 1H), 6.38 (dd,  $J = 16.0, 6.3$  Hz, 1H), 6.28 (t,  $J = 2.0$  Hz, 1H), 5.11 (apparent p,  $J = 6.8$  Hz, 1H), 2.33 (s, 3H), 1.73 (d,  $J = 6.9$  Hz, 3H).  $^{13}\text{C NMR}$  (126 MHz,  $\text{CDCl}_3$ )  $\delta$  139.11, 138.29, 136.28, 131.61, 129.57, 128.88, 128.61, 127.38, 127.28, 123.93, 105.51, 59.50, 21.48, 20.96. **IR** (ATR) 3027, 2979, 2931, 1736, 1604, 1396  $\text{cm}^{-1}$ . **HRMS**

calculated for  $C_{14}H_{16}N_2Na$   $[M+Na]^+$  235.1211, found 235.1208. **Chiral SFC:** 100 mm CHIRALCEL IC, 8.0% *i*PrOH, 2.0 mL/min, 254 nm, 44 °C, nozzle pressure = 200 bar  $CO_2$ ,  $t_{R1}$  (minor) = 2.8 min,  $t_{R2}$  (major) = 3.1 min.

**(S, E)-1-(4-(2-methoxyphenyl)but-3-en-2-yl)-1H-pyrazole (3ha)**

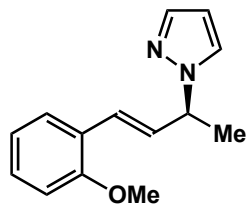

Colorless oil, 40% yield, 92:8 *er*, >20:1 *rr*,  $[\alpha]^{24}_D = +5.3$  (*c* 0.3,  $CHCl_3$ ).  **$^1H$  NMR** (500 MHz,  $CDCl_3$ )  $\delta$  7.55 (d, *J* = 1.5 Hz, 1H), 7.48 (d, *J* = 2.2 Hz, 1H), 7.42 (dd, *J* = 7.6, 1.4 Hz, 1H), 7.25 – 7.21 (m, 1H), 6.93 – 6.85 (m, 3H), 6.43 (dd, *J* = 16.0, 6.9 Hz, 1H), 6.27 (t, *J* = 2.0 Hz, 1H), 5.10 (apparent p, *J* = 6.8 Hz, 1H), 3.84 (s, 3H), 1.73 (d, *J* = 6.9 Hz, 3H).  **$^{13}C$  NMR** (126 MHz,  $CDCl_3$ )  $\delta$  157.0, 139.1, 130.2, 129.2, 127.3, 127.2, 126.6, 125.3, 120.8, 111.0, 105.4, 60.0, 55.6, 21.1. **IR** (ATR)

2978, 2934, 2837, 1684, 1598, 1242  $cm^{-1}$ . **HRMS** calculated for  $C_{14}H_{16}N_2ONa$   $[M+Na]^+$  251.1160, found 251.1167. **Chiral SFC:** 100 mm CHIRALCEL IC, 8.0% *i*PrOH, 2.0 mL/min, 254 nm, 44 °C, nozzle pressure = 200 bar  $CO_2$ ,  $t_{R1}$  (minor) = 3.3 min,  $t_{R2}$  (major) = 4.0 min.

**(S, E)-1-(4-(*o*-tolyl)but-3-en-2-yl)-1H-pyrazole (3ia)**

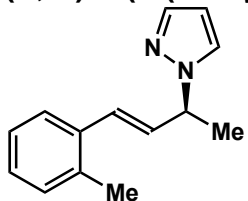

Colorless oil, 62% yield, 90:10 *er*, >20:1 *rr*,  $[\alpha]^{24}_D = +5.5$  (*c* 0.44,  $CHCl_3$ ).  **$^1H$  NMR** (500 MHz, Chloroform-*d*)  $\delta$  7.56 (d, *J* = 1.8 Hz, 1H), 7.49 (d, *J* = 2.3 Hz, 1H), 7.43 – 7.41 (m, 1H), 7.18 – 7.12 (m, 3H), 6.68 (dd, *J* = 15.8, 1.3 Hz, 1H), 6.32 – 6.25 (m, 2H), 5.13 (apparent pd, *J* = 6.9, 1.3 Hz, 1H), 2.32 (s, 3H), 1.74 (d, *J* = 6.9 Hz, 3H).  **$^{13}C$  NMR** (126 MHz,  $CDCl_3$ )  $\delta$  139.1, 135.8, 135.5, 131.2, 130.5, 129.4,

128.0, 127.3, 126.3, 126.0, 105.6, 59.8, 21.1, 19.9. **HRMS** calculated for  $C_{14}H_{16}N_2Na$   $[M+Na]^+$  235.1211, found 235.1210. **IR** (ATR) 3019, 2977, 2933, 1680, 1396  $cm^{-1}$ .

**Chiral SFC:** 100 mm CHIRALCEL AD-H, 4.0% *i*PrOH, 3.0 mL/min, 254 nm, 44 °C, nozzle pressure = 200 bar  $CO_2$ ,  $t_{R1}$  (major) = 4.6 min,  $t_{R2}$  (minor) = 5.5 min.

**(S, E)-1-(4-(furan-2-yl)but-3-en-2-yl)-1H-pyrazole (3ja)**

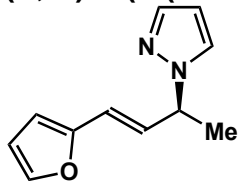

Colorless oil, 34% yield, 90:10 *er*, >20:1 *rr*,  $[\alpha]^{24}_D = -7.6$  (*c* 0.21,  $CHCl_3$ ).  **$^1H$  NMR** (500 MHz,  $CDCl_3$ )  $\delta$  7.55 (d, *J* = 1.8 Hz, 1H), 7.47 (d, *J* = 2.3 Hz, 1H), 7.33 (d, *J* = 1.8 Hz, 1H), 6.35 (dd, *J* = 3.3, 1.8 Hz, 1H), 6.34 – 6.21 (m, 4H), 5.10 (apparent p, *J* = 6.4 Hz, 1H), 1.70 (d, *J* = 6.9 Hz, 3H).  **$^{13}C$  NMR** (126 MHz,  $CDCl_3$ )  $\delta$  151.95, 142.36, 139.12, 128.31,

127.31, 119.83, 111.48, 108.90, 105.58, 59.09, 20.80. **IR** (ATR) 3118, 2981, 2933, 1668, 1508, 1397  $cm^{-1}$ . **HRMS** calculated for  $C_{11}H_{12}N_2O$   $[M]^+$  188.0950, found 188.0943. **Chiral SFC:** 100 mm CHIRALCEL AD-H, 3.0% *i*PrOH, 3.0 mL/min, 254 nm, 44 °C, nozzle pressure = 200 bar  $CO_2$ ,  $t_{R1}$  (major) = 4.1 min,  $t_{R2}$  (minor) = 8.0 min.

**(S, E)-1-(4-(thiophen-2-yl)but-3-en-2-yl)-1H-pyrazole (3ka)**



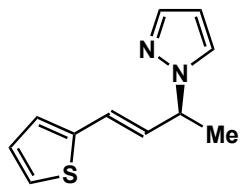

Colorless oil, 95% yield, 93:7 *er*, >20:1 *rr*,  $[\alpha]^{24}_{\text{D}} = -34.8$  (c 0.43,  $\text{CHCl}_3$ ).  **$^1\text{H NMR}$**  (500 MHz,  $\text{CDCl}_3$ )  $\delta$  7.55 (d,  $J = 1.8$  Hz, 1H), 7.47 (d,  $J = 2.7$  Hz, 1H), 7.17 – 7.14 (m, 1H), 6.97 – 6.93 (m, 2H), 6.58 (dd,  $J = 15.7$ , 1.3 Hz, 1H), 6.29 – 6.27 (m, 1H), 6.22 (dd,  $J = 16.0$ , 6.5 Hz, 1H), 5.08 (apparent p,  $J = 6.4$  Hz, 1H), 1.71 (d,  $J = 6.9$  Hz, 3H).  **$^{13}\text{C NMR}$**  (126 MHz,  $\text{CDCl}_3$ )  $\delta$  141.3, 139.2, 129.2, 127.5, 127.3, 126.5, 124.8, 124.7, 105.6, 59.2, 20.8. **IR** (ATR) 3104, 2979, 2932, 1648, 1509, 1396  $\text{cm}^{-1}$ . **HRMS** calculated for  $\text{C}_{11}\text{H}_{12}\text{N}_2\text{S}$   $[\text{M}]^+$  204.0721, found 204.0711. **Chiral SFC**: 100 mm CHIRALCEL AD-H, 3.0% *i*PrOH, 3.0 mL/min, 254 nm, 44 °C, nozzle pressure = 200 bar  $\text{CO}_2$ ,  $t_{\text{R}1}$  (major) = 8.2 min,  $t_{\text{R}2}$  (minor) = 12.6 min.

### (S, E)-1-(4-cyclohexylbut-3-en-2-yl)-3-phenyl-1H-pyrazole (3la)

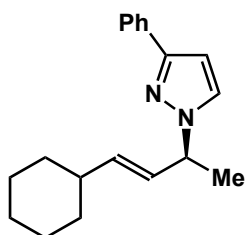

Colorless oil, 45% yield, 95:5 *er*, 2.2:1 *rr*, >20:1  $N^1:N^2$ ,  $[\alpha]^{24}_{\text{D}} = +11.26$  (c 0.23,  $\text{CHCl}_3$ ).  **$^1\text{H NMR}$**  (500 MHz,  $\text{CDCl}_3$ )  $\delta$  7.81 (d,  $J = 7.2$  Hz, 2H), 7.42 (d,  $J = 2.3$  Hz, 1H), 7.38 (t,  $J = 7.7$  Hz, 2H), 7.30 – 7.26 (m, 1H), 6.54 (d,  $J = 2.3$  Hz, 1H), 5.70 – 5.59 (m, 2H), 4.93 (apparent p,  $J = 6.6$  Hz, 1H), 2.03 – 1.95 (m, 1H), 1.77 – 1.65 (m, 5H), 1.62 (d,  $J = 6.9$  Hz, 3H), 1.31 – 1.03 (m, 5H).  **$^{13}\text{C NMR}$**  (126 MHz,  $\text{CDCl}_3$ )  $\delta$  150.91, 139.06, 133.98, 128.67, 128.21, 127.74, 127.51, 125.77, 102.60, 77.16, 59.65, 40.47, 32.87, 26.26, 26.11, 21.32. **IR** (ATR) 2978, 2922, 2850, 1497, 1458, 1215, 746  $\text{cm}^{-1}$ . **HRMS** calculated for  $\text{C}_{19}\text{H}_{24}\text{N}_2$   $[\text{M}]^+$  280.1939, found 280.1935. **Chiral SFC**: 100 mm CHIRALCEL AD-H, 4.0% *i*PrOH, 2.0 mL/min, 254 nm, 44 °C, nozzle pressure = 200 bar  $\text{CO}_2$ ,  $t_{\text{R}1}$  (minor) = 4.7 min,  $t_{\text{R}2}$  (major) = 5.5 min.

### (S)-1-(cyclohex-2-en-1-yl)-1H-pyrazole (3ma)

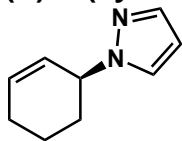

Colorless oil, 73% yield, 81:19 *er*, >20:1 *rr*,  $[\alpha]^{24}_{\text{D}} = +38.95$  (c 0.19,  $\text{CHCl}_3$ ).  **$^1\text{H NMR}$**  (500 MHz,  $\text{CDCl}_3$ )  $\delta$  7.53 (s, 1H), 7.45 (d,  $J = 2.0$  Hz, 1H), 6.26 – 6.22 (m, 1H), 6.10 – 6.06 (m, 1H), 5.83 – 5.80 (m, 1H), 4.98 – 4.91 (m, 1H), 2.21 – 2.05 (m, 3H), 2.00 – 1.94 (m, 1H), 1.72 – 1.65 (m, 2H).  **$^{13}\text{C NMR}$**  (126 MHz,  $\text{CDCl}_3$ )  $\delta$  139.18, 132.76, 127.74, 125.62, 105.00, 57.16, 30.68, 24.94, 19.45. **IR** (ATR) 3029, 2929, 2865, 1668, 1508, 1395, 1293  $\text{cm}^{-1}$ . **HRMS** calculated for  $\text{C}_9\text{H}_{13}\text{N}_2$   $[\text{M}+\text{H}]^+$  149.1079, found 149.1078. **Chiral SFC**: 100 mm CHIRALCEL AD-H, 4.0% *i*PrOH, 2.0 mL/min, 254 nm, 44 °C, nozzle pressure = 200 bar  $\text{CO}_2$ ,  $t_{\text{R}1}$  (minor) = 4.7 min,  $t_{\text{R}2}$  (major) = 5.5 min.

### 1-(2-methylbut-3-en-2-yl)-4-(4,4,5,5-tetramethyl-1,3,2-dioxaborolan-2-yl)-1H-pyrazole (3na)

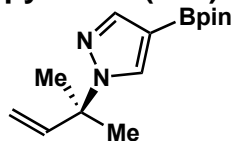

Colorless oil, 52% yield, >20:1 *rr*.  **$^1\text{H NMR}$**  (500 MHz,  $\text{CDCl}_3$ )  $\delta$  7.83 (s, 1H), 7.82 (s, 1H), 6.09 (dd,  $J = 17.4$ , 10.7 Hz, 1H), 5.15 (d,  $J = 10.7$  Hz, 1H), 5.08 (d,  $J = 17.4$  Hz, 1H), 1.68 (s, 6H), 1.31 (s, 12H).  **$^{13}\text{C NMR}$**  (126 MHz,  $\text{CDCl}_3$ )  $\delta$  145.09, 142.86, 133.72, 113.69, 83.22, 61.82, 27.42, 24.76. **IR** (ATR): 2979, 1553, 1404, 1370, 1299, 1247, 1141, 986, 857  $\text{cm}^{-1}$ . **HRMS** calculated for  $\text{C}_{14}\text{H}_{24}\text{BN}_2\text{O}_2\text{Na}$   $[\text{M}+\text{Na}]^+$  285.1573, found 285.1572.

### (S)-1-(3,7-dimethylocta-1,6-dien-3-yl)-3-phenyl-1H-pyrazole (3oa)

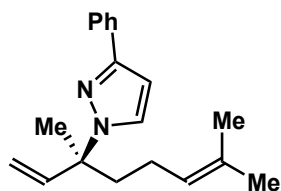

Colorless oil, 42% yield, 78:22 *er*, >20:1 *rr*, >20:1 *N*<sup>1</sup>:*N*<sup>2</sup>. **<sup>1</sup>H NMR** (500 MHz, CDCl<sub>3</sub>) δ 7.83 (dd, *J* = 7.4, 0.9 Hz, 2H), 7.50 (d, *J* = 2.4 Hz, 1H), 7.38 (dd, *J* = 10.5, 5.0 Hz, 2H), 7.30 – 7.25 (m, 1H), 6.53 (d, *J* = 2.4 Hz, 1H), 6.21 (dd, *J* = 17.4, 10.8 Hz, 1H), 5.22 (d, *J* = 10.8 Hz, 1H), 5.13 (d, *J* = 17.5 Hz, 1H), 5.11 – 5.07 (m, 1H), 2.24 – 2.12 (m, 1H), 2.05 – 1.98 (m, 1H), 1.94 – 1.82 (m, 2H), 1.71 (s, 3H), 1.66 (s, 3H), 1.55 (s, 3H). **<sup>13</sup>C NMR** (126 MHz, CDCl<sub>3</sub>) δ 150.78, 142.59, 134.31, 132.11, 128.61, 127.38, 125.78, 123.77, 114.38, 102.16, 77.16, 64.72, 40.63, 25.80, 24.52, 22.75, 17.72. **IR** (ATR): 2969, 2925, 1496, 1457, 1374, 1210, 1073, 1048, 922, 745 cm<sup>-1</sup>. **HRMS** calculated for C<sub>14</sub>H<sub>23</sub>BN<sub>2</sub>O<sub>2</sub>Na [M+Na]<sup>+</sup> 303.1837, found 303.1841. **Chiral SFC**: 250 mm CHIRALCEL OJ-H, 4.0% *i*PrOH, 2.0 mL/min, 240 nm, 44 °C, nozzle pressure = 200 bar CO<sub>2</sub>, *t*<sub>R1</sub> (major) = 2.6 min, *t*<sub>R2</sub> (minor) = 2.8 min.

## 4. Mechanism studies

### 4A. Deuterium-labeling study

#### (1) Synthesis of **d-1a**:

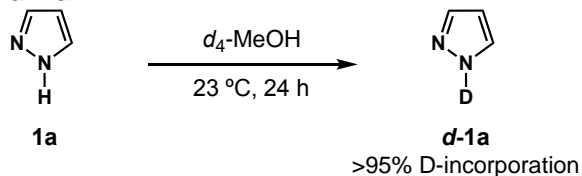

An oven dried vial equipped with a magnetic stir bar was charged with pyrazole (**1a**, 1.47 mmol). The solid was then dissolved in  $d_4$ -MeOH (2.94 mL) to obtain a 0.5 M solution. The reaction was then stirred at 23 °C for 24 hours. The solution was then concentrated *in vacuo* affording the title compound **d-1a** as a white solid quantitatively (>99%).  $^1\text{H NMR}$  shows >95% D incorporation.  $^1\text{H NMR}$  (400 MHz,  $\text{CDCl}_3$ )  $\delta$  7.63 (d,  $J = 2.1$  Hz, 2H), 6.35 (t,  $J = 2.1$  Hz, 1H).  $^2\text{H NMR}$  (61 MHz,  $\text{CHCl}_3$ )  $\delta$  11.66 (s, 1H).

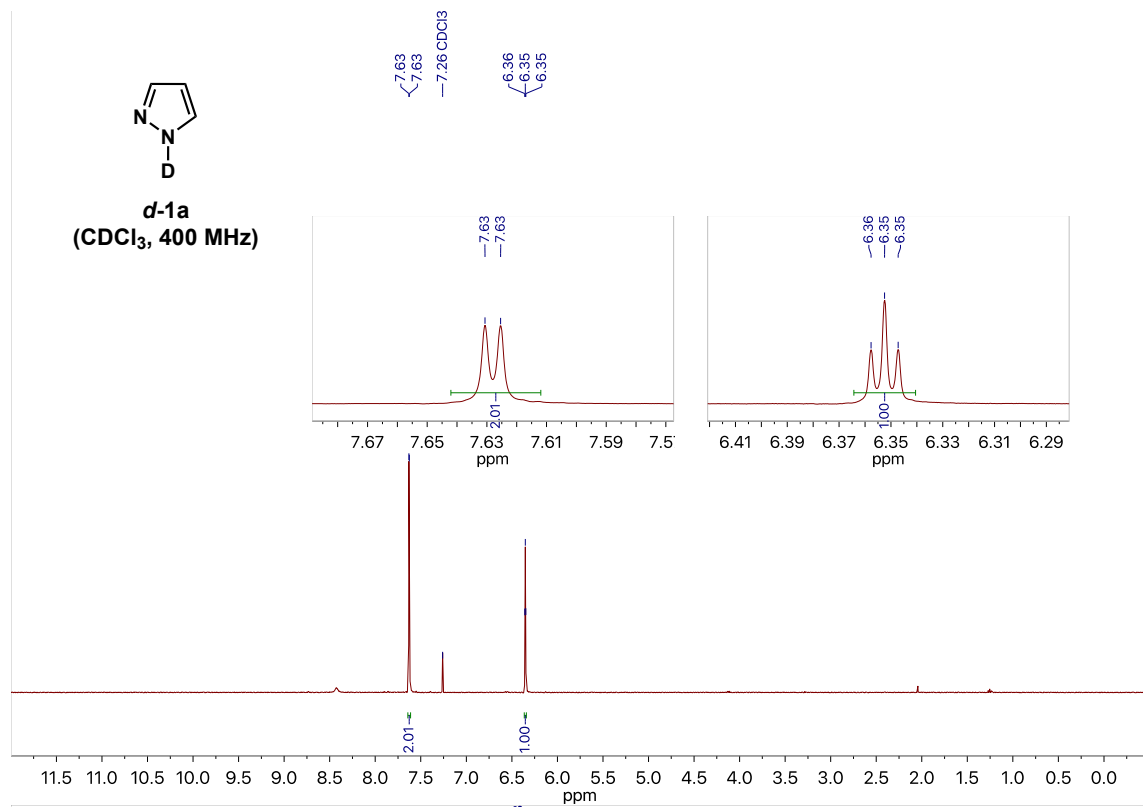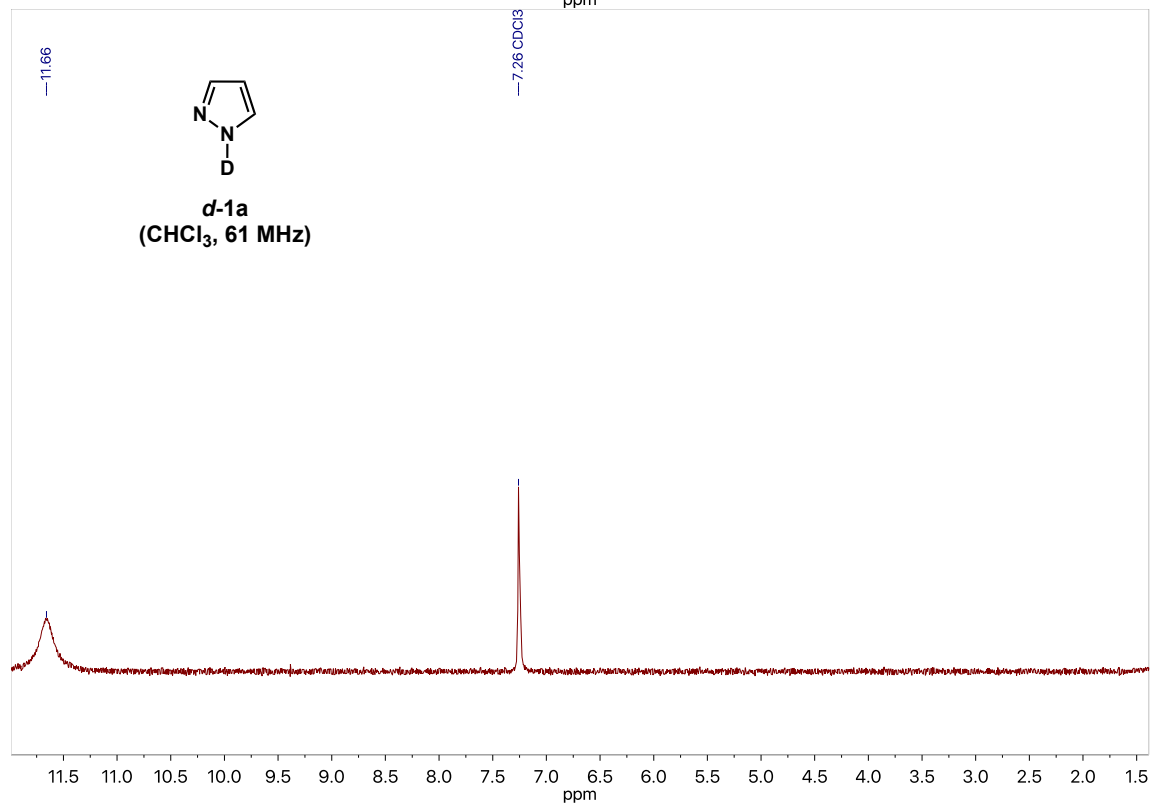

## (2) Synthesis of *d*-3aa:

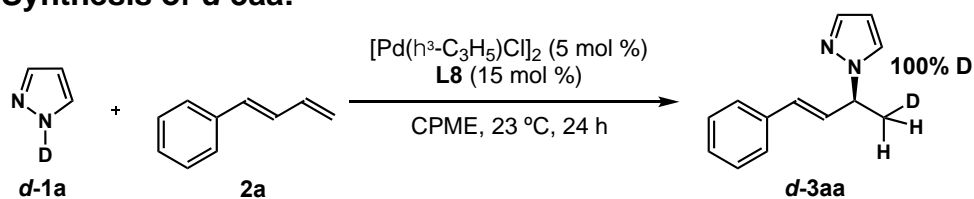

Following the “General procedure for the hydroamination of 1,3-dienes with azoles” on page **S5**, **d-1a** was used as the pyrazole coupling partner. The target compound **d-3aa** was obtained in 41% yield. Colorless oil, >20:1 *rr*. **<sup>1</sup>H NMR** (400 MHz, CDCl<sub>3</sub>) δ 7.56 (d, *J* = 1.3 Hz, 1H), 7.48 (d, *J* = 1.8 Hz, 1H), 7.39 – 7.35 (m, 2H), 7.31 (ddd, *J* = 7.5, 6.7, 1.2 Hz, 2H), 7.27 – 7.22 (m, 1H), 6.52 – 6.36 (m, 2H), 6.29 – 6.27 (m, 1H), 5.12 (p, *J* = 6.3 Hz, 1H), 1.73 (d, *J* = 6.9 Hz, 2H). **<sup>2</sup>H NMR** (61 MHz, CHCl<sub>3</sub>) δ 1.74 (s, 1H). Deuterium incorporation was determined by <sup>1</sup>H NMR. Percent deuterium (% D) incorporation is depicted as the amount of deuterium in place of a single hydrogen atom at that site.

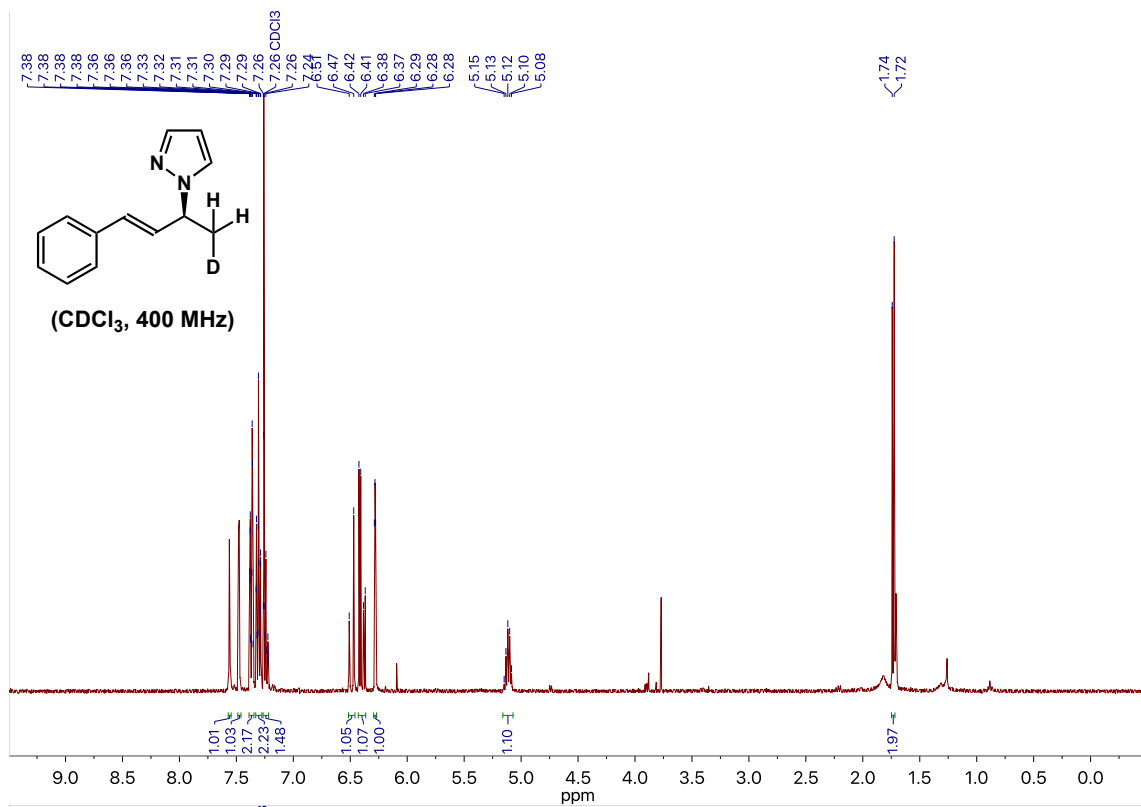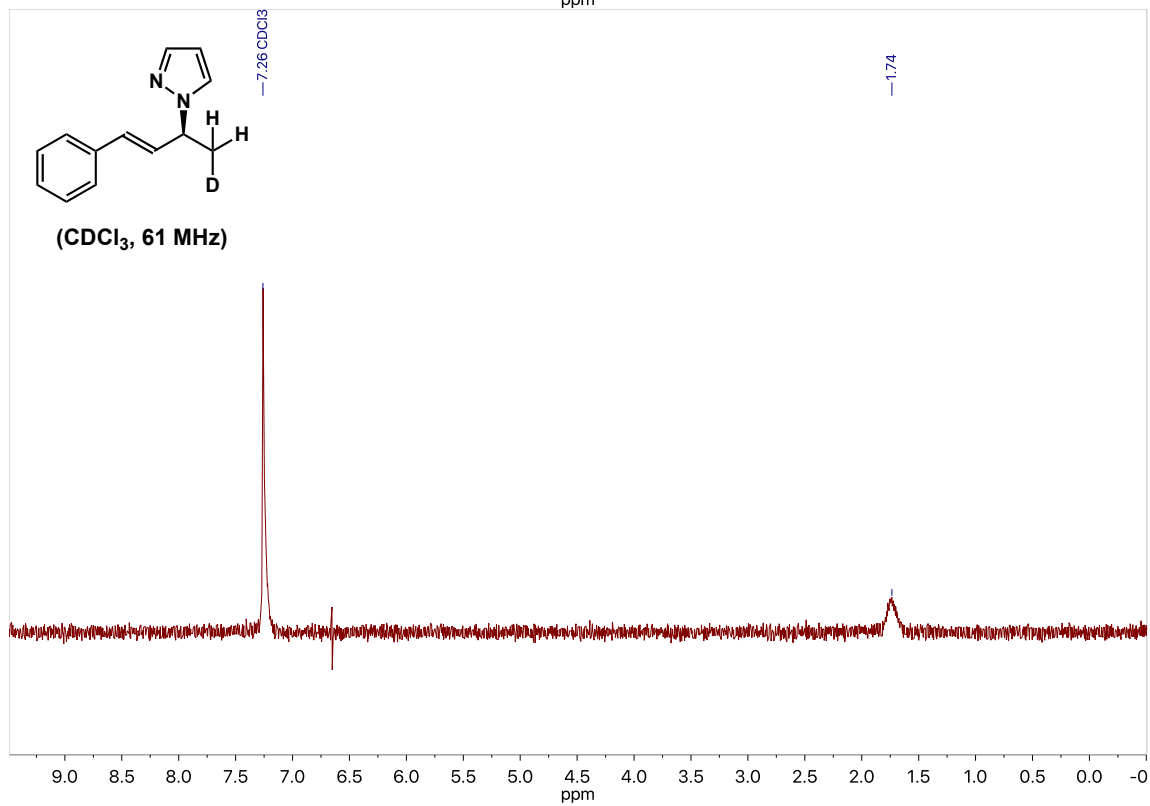

#### 4B. Initial Rate Kinetic Isotope Effects (KIE) study

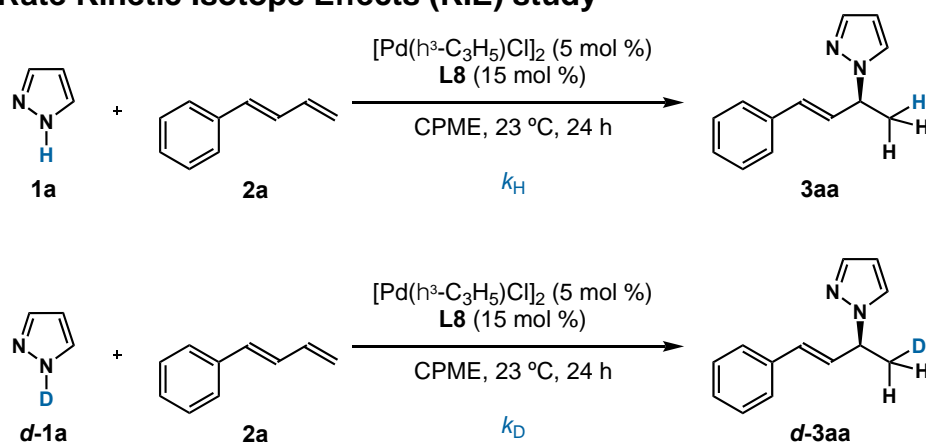

In a N<sub>2</sub>-filled glovebox, an oven dried 1-dram vial equipped with a magnetic stir bar was charged with [Pd( $\eta^3$ -C<sub>3</sub>H<sub>5</sub>)Cl]<sub>2</sub> (1.8 mg, 5.0  $\mu$ mol), MeO-BIPHEP **L8** (16.4 mg, 15.0  $\mu$ mol) and CPME (0.2 mL). The resulting mixture was stirred for 10 mins and then diene **2a** (500.0  $\mu$ mol) followed by a solution of freshly recrystallized pyrazole **1a** or **d-1a** (100.0  $\mu$ mol) in CPME (0.1 mL) and 1,3,5-trimethoxybenzene (8.4 mg, 50.0  $\mu$ mol) in CPME (0.1 mL) were added dropwise. The mixtures were capped with Teflon caps, removed from the glovebox and stirred at 23 °C. Aliquots (10  $\mu$ L) were taken every 30 mins and quenched in 100  $\mu$ L of methanol. The concentration of **3aa** and **d-3aa** was monitored by GC-FID analysis using 1,3,5-trimethoxybenzene as an internal standard. The KIE was calculated to be 1.4 using the following equation:

$$KIE = \frac{k_H}{k_D}$$

| Trial                                              | A      | B      | A      | B      | H average<br>$k_{\text{obs}}$ | D average<br>$k_{\text{obs}}$ |
|----------------------------------------------------|--------|--------|--------|--------|-------------------------------|-------------------------------|
| Pyrazole                                           | H      | H      | D      | D      |                               |                               |
| $k_{\text{obs}}$<br>( $\mu\text{mol}/\text{min}$ ) | 0.0143 | 0.0138 | 0.0098 | 0.0109 | 0.0141                        | 0.0104                        |
| R <sup>2</sup>                                     | 0.95   | 0.95   | 0.98   | 0.99   | –                             | –                             |

**Table S1.** KIE data for the reaction. Each H and D experiment was repeated in duplicate, and the KIE was calculated from the averages of the H and D  $k_{\text{obs}}$ .

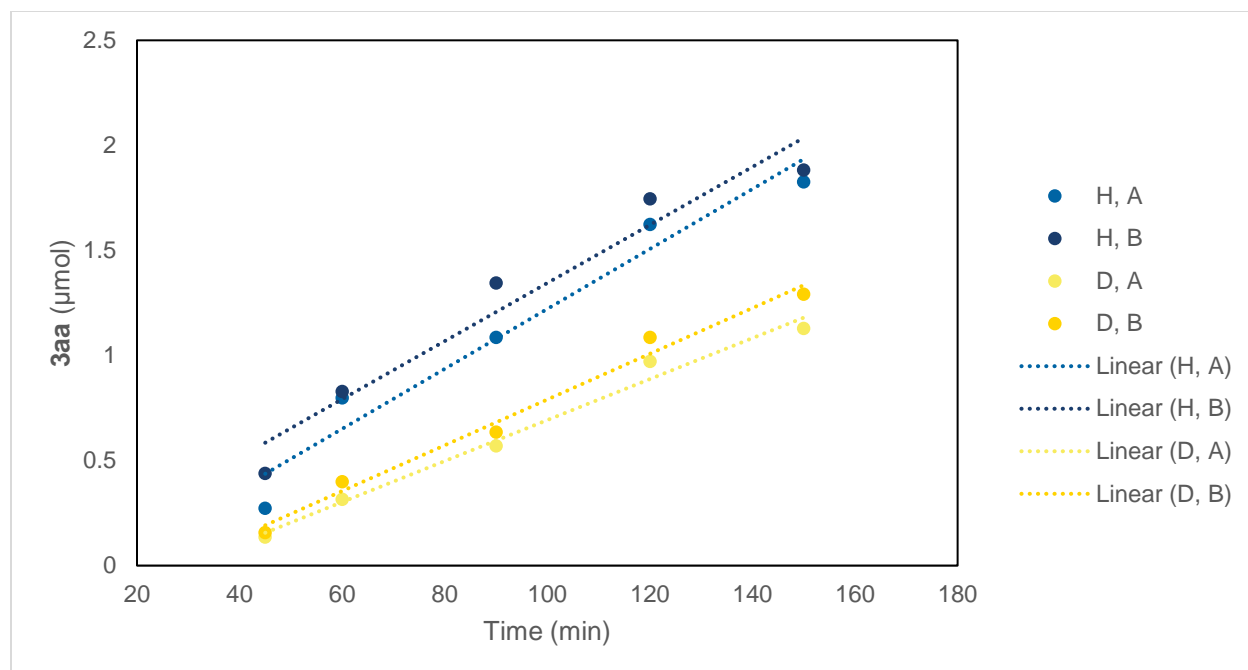

**Figure S5.** Graph illustrating the KIE data. Slopes were fit using a least-square linear regression model.

#### 4C. Diene Geometry Study

##### (1) Synthesis of (**Z**)-**2a**:

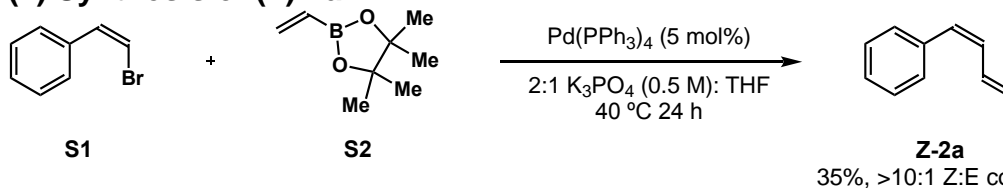

In a  $\text{N}_2$ -filled glovebox, an oven dried 50 mL flask equipped with a magnetic stir bar was charged with **S1** (1.0 g, 5.5 mmol, 1 equiv), **S2** (1.0 g, 6.6 mmol, 1.2 equiv), and  $\text{Pd(PPh}_3)_4$  (0.63 g, 0.55 mmol, 0.1 equiv).<sup>4</sup> The flask was capped with a rubber septum and removed from the glovebox. THF (11 mL) and 0.5 M aq.  $\text{K}_3\text{PO}_4$  (22 mL, degassed by sparging with  $\text{N}_2$  for 30 mins) were added sequentially via syringe. The reaction mixture was vigorously stirred at 40 °C for 18 hours. The reaction was cooled to rt and then diluted with 20 mL of  $\text{H}_2\text{O}$  and 20 mL  $\text{Et}_2\text{O}$ . The mixture was then extracted with  $\text{Et}_2\text{O}$  (3 x 15 mL) and combined. The organic phase was then washed with 40 mL of sat. aq. brine, dried over  $\text{MgSO}_4$  and concentrated in vacuo. The target compound was then purified via flash silica gel chromatography (100% hexanes) to yield (**Z**)-**2a** as a clear oil (250 mg, 1.92 mmol, 35% yield) as a >10:1 mixture of Z:E isomers.  $^1\text{H NMR}$  (400 MHz,  $\text{CDCl}_3$ )  $\delta$  7.36 – 7.23 (m, 4H), 7.20 – 7.16 (m, 1H), 6.82 (dddd,  $J = 16.9, 11.2, 10.2, 1.0$  Hz, 1H), 6.40 (d,  $J = 11.7$  Hz, 1H), 6.20 (t,  $J = 11.3$  Hz, 1H), 5.33 – 5.29 (m, 1H), 5.18 – 5.13 (m, 1H). The spectral data match those previously reported.<sup>5</sup>



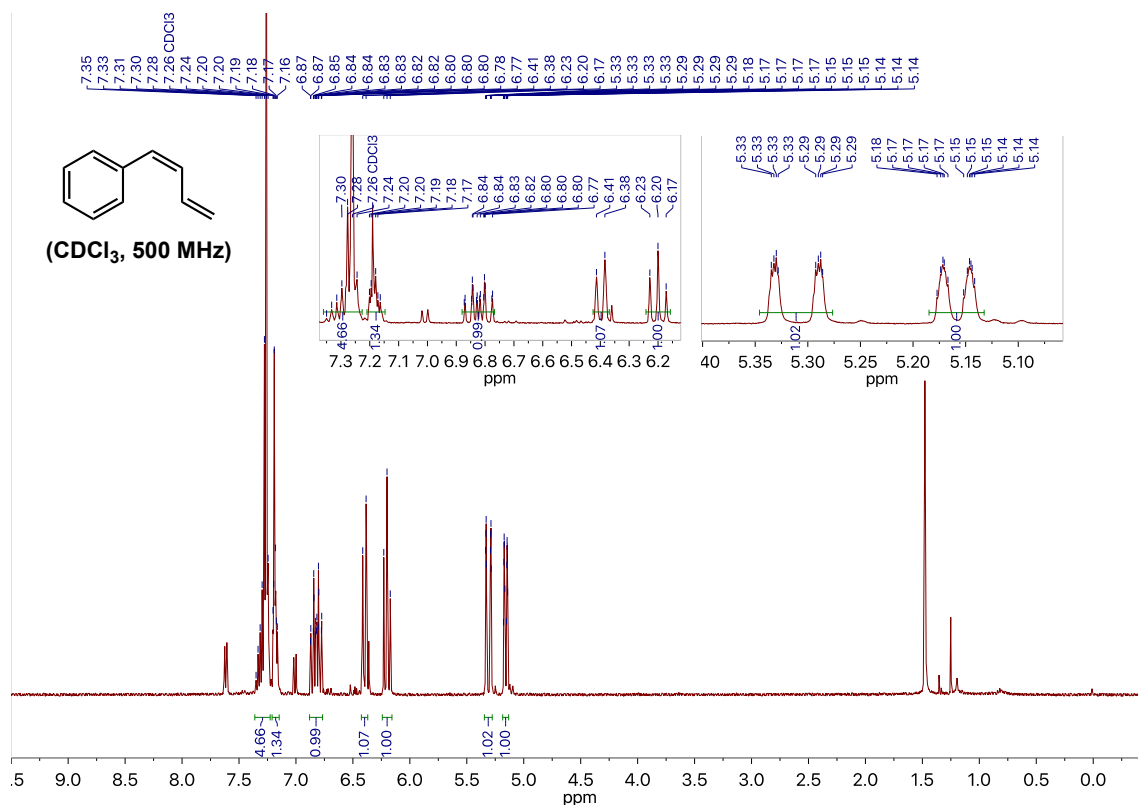

## (2) Hydroamination of (*Z*)-2a:

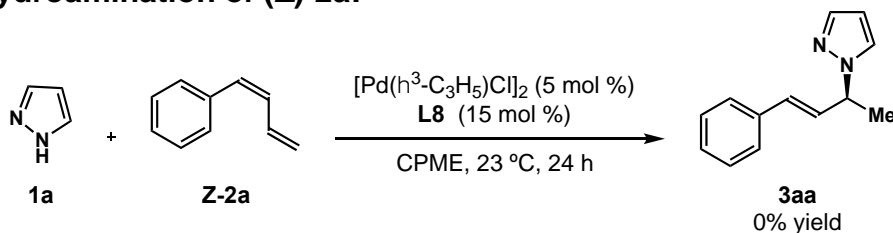

In a N<sub>2</sub>-filled glovebox, an oven dried 1-dram vial equipped with a magnetic stir bar was charged with  $[\text{Pd}(\eta^3\text{-C}_3\text{H}_5)\text{Cl}]_2$  (1.8 mg, 5.0 μmol), MeO-BIPHEP **L8** (16.4 mg, 15.0 μmol) and CPME (0.3 mL). The resulting mixture was stirred for 10 mins and then (**Z**)-2a (500.0 μmol) followed by a solution of freshly recrystallized pyrazole (100.0 μmol) in CPME (0.1 mL) were added dropwise. The mixture was removed from the glovebox and stirred at 23 °C for 24 hours. No desired product observed by LCMS or TLC after 24 hours.

## (3) Hydroamination with a 1:1 mixture of 2a and (*Z*)-2a:

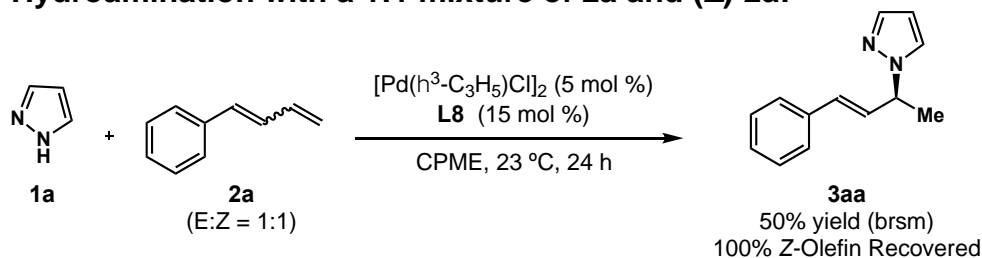

In a N<sub>2</sub>-filled glovebox, an oven dried 1-dram vial equipped with a magnetic stir bar was charged with [Pd( $\eta^3$ -C<sub>3</sub>H<sub>5</sub>)Cl]<sub>2</sub> (1.8 mg, 5.0  $\mu$ mol), MeO-BIPHEP **L8** (16.4 mg, 15.0  $\mu$ mol) and CPME (0.3 mL). The resulting mixture was stirred for 10 mins. Then a 1:1 mixture of (**E**)-**2a** (50.0  $\mu$ mol) and (**Z**)-**2a** (50.0  $\mu$ mol) were added, followed by a solution of freshly recrystallized pyrazole (100.0  $\mu$ mol) in CPME (0.1 mL) were added dropwise. The mixture was removed from the glovebox and stirred at 23 °C for 24 hours. The target compound was isolated via preparatory thin-layer chromatography on silica gel using 10% EtOAc in Hexanes. Colorless oil, 25% yield, 94:6 *er*, >20:1 *rr*.

#### 4D. Crossover Studies

##### (1) Crossover study with **3aa**

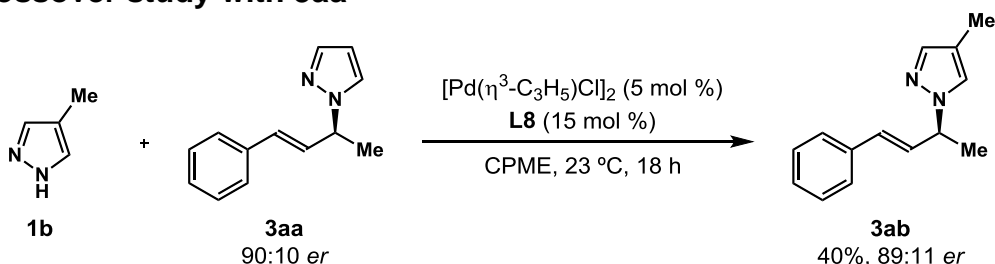

In a N<sub>2</sub>-filled glovebox, an oven dried 1-dram vial equipped with a magnetic stir bar was charged with [Pd( $\eta^3$ -C<sub>3</sub>H<sub>5</sub>)Cl]<sub>2</sub> (0.9 mg, 2.0  $\mu$ mol), MeO-BIPHEP **L8** (8.4 mg, 7.7  $\mu$ mol) and CPME (0.4 mL). The resulting mixture was stirred for 10 mins. Then **3aa** (10.2 mg, 51.4  $\mu$ mol, 90:10 *er*) was added followed by a solution of **2b** (4.6 mg, 56  $\mu$ mol) in CPME (0.1 mL). The reaction was removed from the glovebox and stirred at rt for 18 hours. Resulting yields were determined by NMR of the crude mixture (13.2  $\mu$ mol **3aa** at 83:7 *er*, 21.3  $\mu$ mol **3ab** at 89:11 *er*). The products were isolated as a mixture using preparatory thin-layer chromatography (6 mg). Enantioselectivity was determined by chiral SFC characterization. **SFC**: 150 mm CHIRALCEL AD-H, 10.0% *i*PrOH, 2.0 mL/min, 254 nm, 44 °C, nozzle pressure = 200 bar CO<sub>2</sub>; **3aa**: *t*<sub>R1</sub> (minor) = 2.4 min, *t*<sub>R2</sub> (major) = 2.8min. **3ab**: *t*<sub>R1</sub> (minor) = 3.3 min, *t*<sub>R2</sub> (major) = 3.7 min.

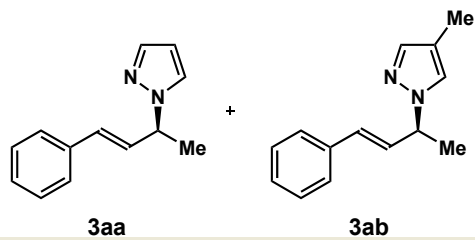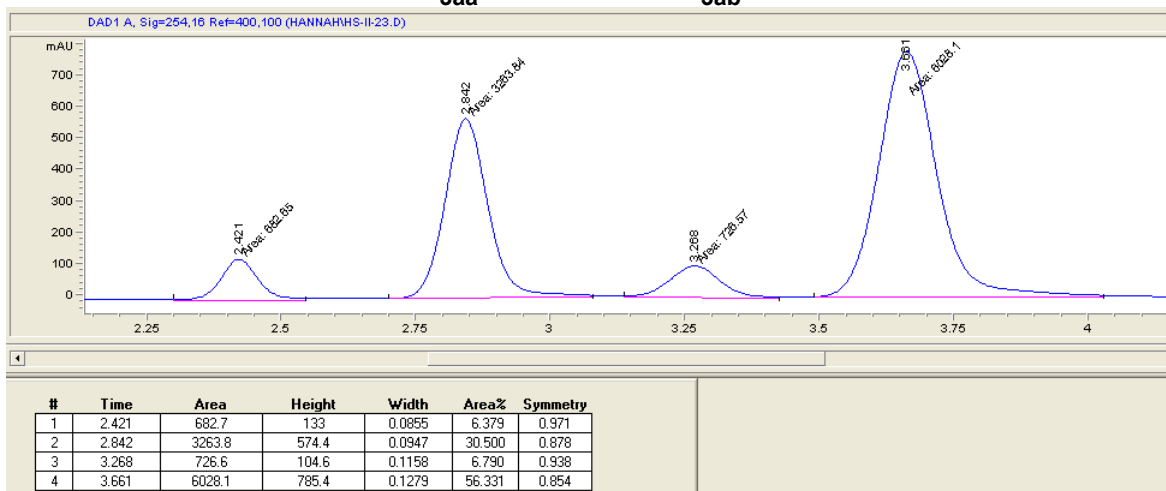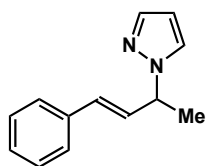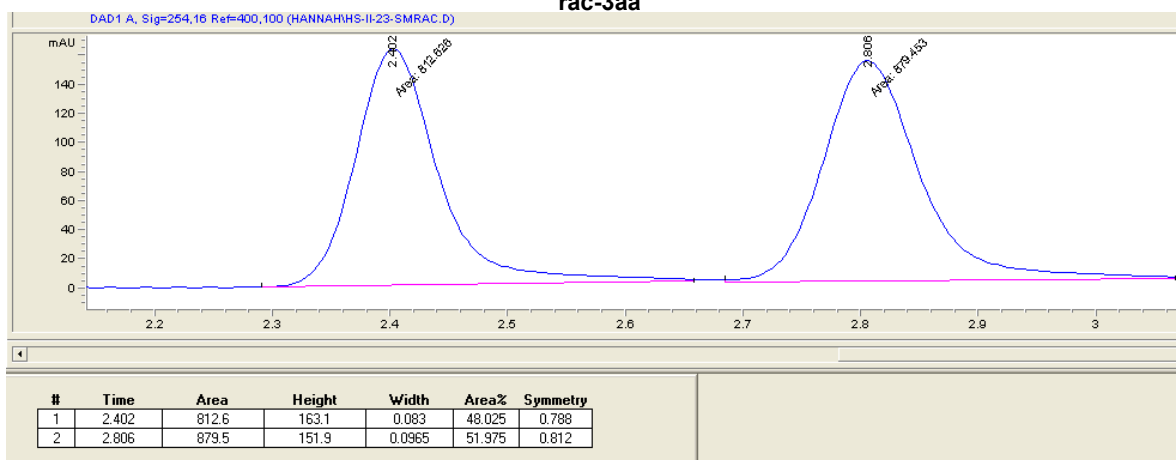

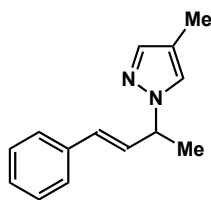

rac-3ab

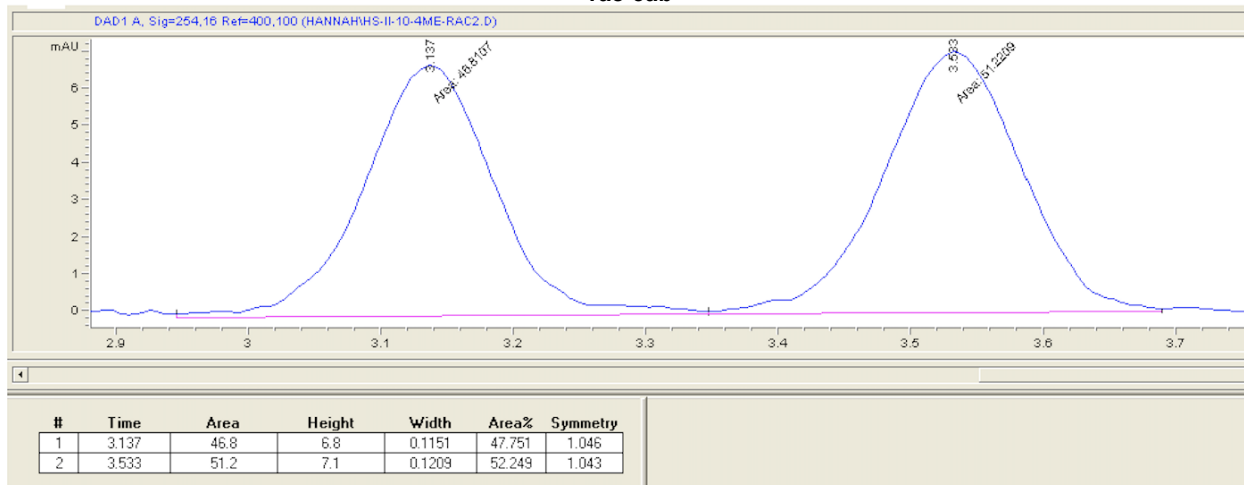

## (2) Crossover study with rac-3aa

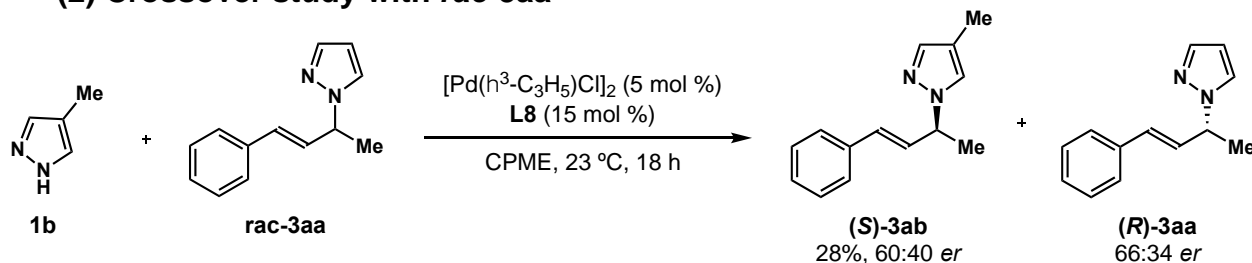

In a N<sub>2</sub>-filled glovebox, an oven dried 1-dram vial equipped with a magnetic stir bar was charged with [Pd(η<sup>3</sup>-C<sub>3</sub>H<sub>5</sub>)Cl]<sub>2</sub> (2.0 mg, 5.5 μmol), MeO-BIPHEP **L8** (18.5 mg, 16.9 μmol) and CPME (0.4 mL). The resulting mixture was stirred for 10 mins. Then *rac*-**3aa** (22.4 mg, 113 μmol) was added, followed by a solution of **2b** (9.4 mg, 110 μmol) in CPME (0.1 mL). The reaction was removed from the glovebox and stirred at rt for 18 hours. Resulting yields were determined by NMR of the crude mixture (18.7 μmol **3aa**, 31.4 μmol **3ab**). The products were isolated as a mixture using preparatory thin-layer chromatography (10.3 mg). Enantioselectivity was determined by chiral SFC characterization. **SFC**: 150 mm CHIRALCEL AD-H, 10.0% <sup>i</sup>PrOH, 2.0 mL/min, 254 nm, 44 °C, nozzle pressure = 200 bar CO<sub>2</sub>; **3aa**: t<sub>R1</sub> (major) = 2.3 min, t<sub>R2</sub> (minor) = 2.7 min. **3ab**: t<sub>R1</sub> (minor) = 3.2 min, t<sub>R2</sub> (major) = 3.6 min.

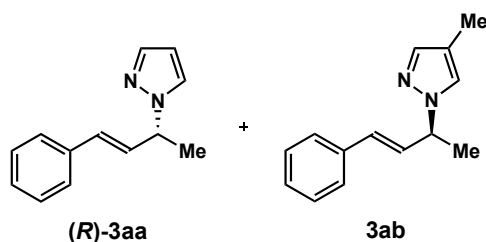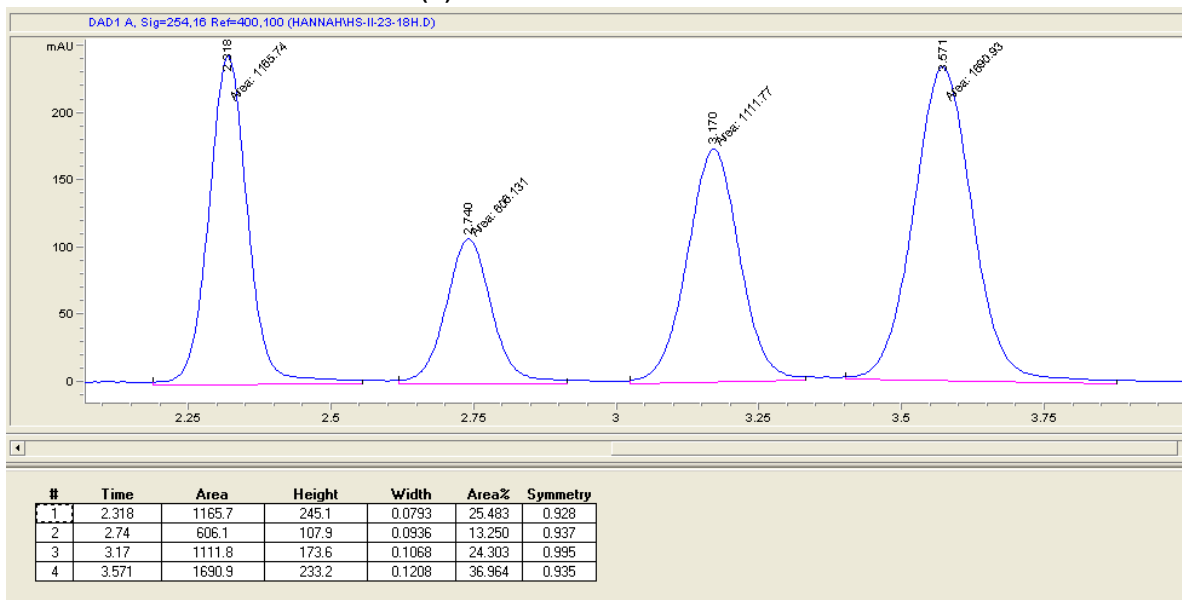

#### 4E. Stability of Product 3aa

##### (1) 3aa under standard conditions without excess pyrazole

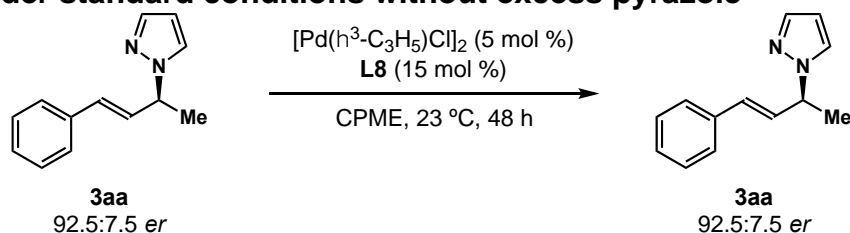

In a N<sub>2</sub>-filled glovebox, an oven dried 1-dram vial equipped with a magnetic stir bar was charged with [Pd(η<sup>3</sup>-C<sub>3</sub>H<sub>5</sub>)Cl]<sub>2</sub> (1.8 mg, 4.92 μmol), MeO-BIPHEP **L8** (16.4 mg, 14.8 μmol) and CPME (0.3 mL). The resulting mixture was stirred for 10 mins. Then a solution of **3aa** (19.5 mg, 98.4 μmol) in CPME (0.1 mL) was added dropwise. The mixture was removed from the glovebox and stirred at 23 °C for 48 hours. Aliquots were taken every 24 hours and the target compound was isolated via preparatory thin-layer chromatography on silica gel using 10% EtOAc in Hexanes. No change in *er* for **3aa** was observed after 48 hours.

### -Start

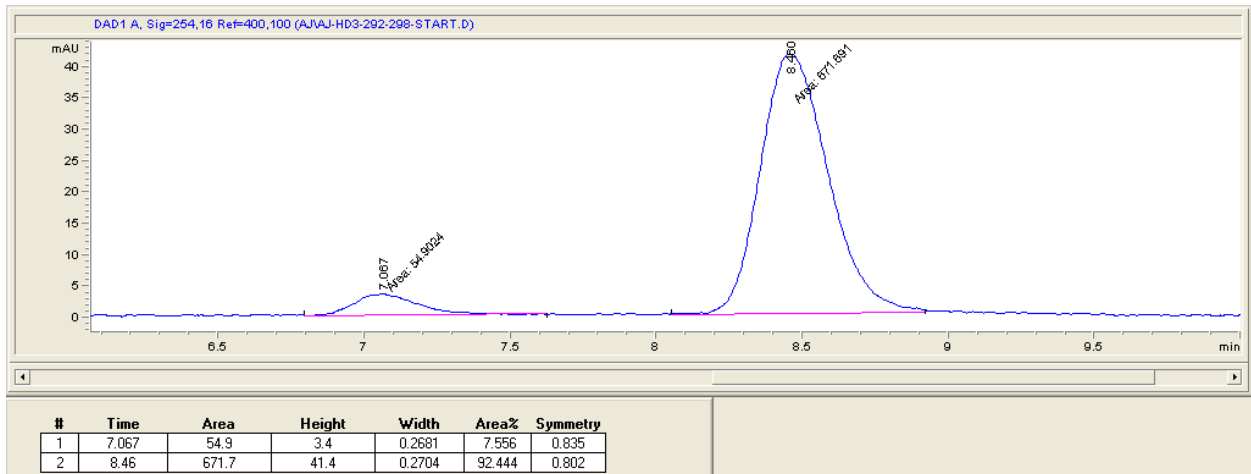

### -24 hours

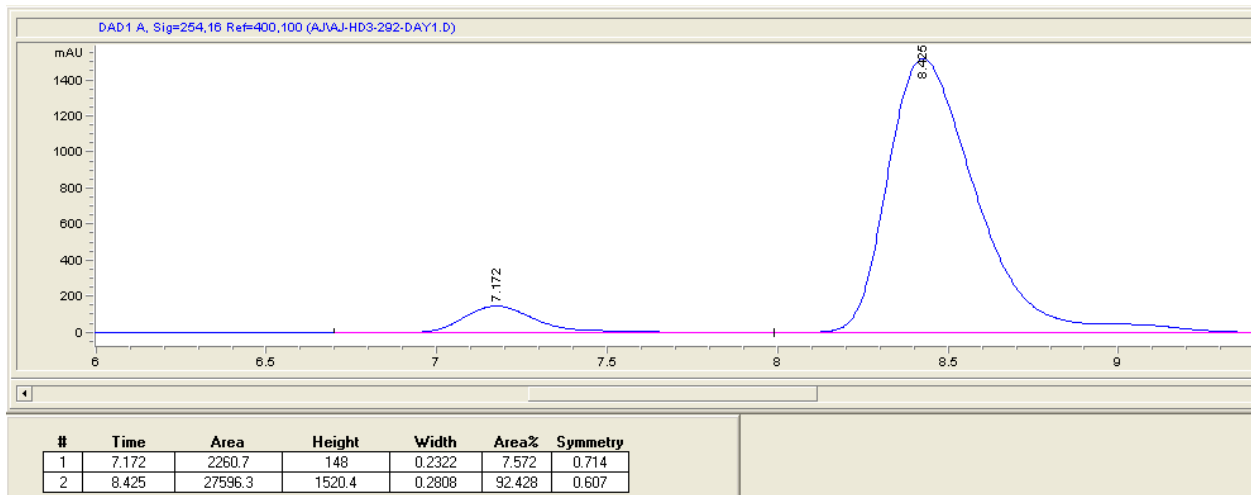

### -48 hours

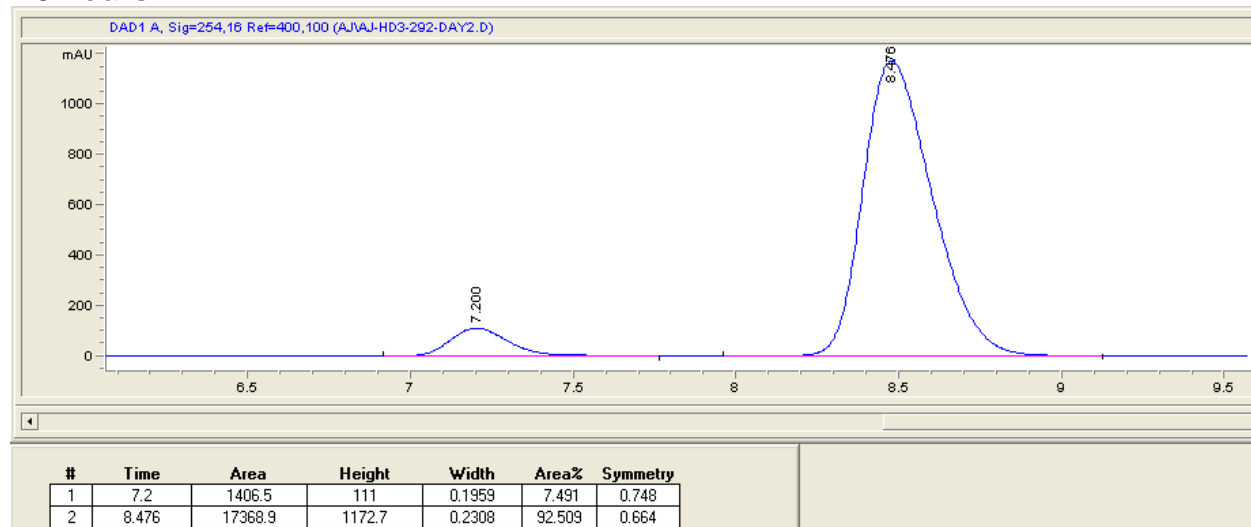

## (2) 3aa under standard conditions with excess pyrazole

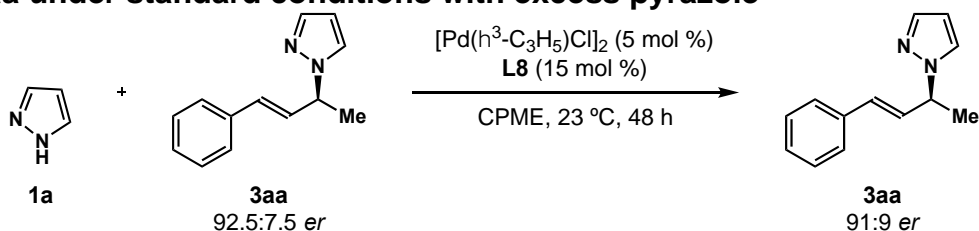

In a N<sub>2</sub>-filled glovebox, an oven dried 1-dram vial equipped with a magnetic stir bar was charged with [Pd( $\eta^3$ -C<sub>3</sub>H<sub>5</sub>)Cl]<sub>2</sub> (1.1 mg, 2.90  $\mu$ mol), MeO-BIPHEP (9.5 mg, 8.70  $\mu$ mol) and CPME (0.1 mL). The resulting mixture was stirred for 10 mins. Then a solution of **3aa** (11.5 mg, 58.0  $\mu$ mol) and pyrazole **1a** (3.95 mg, 58.0  $\mu$ mol) in CPME (0.1 mL) was added dropwise. The mixture was removed from the glovebox and stirred at 23  $^\circ$ C for 48 hours. Aliquots were taken every 24 hours and the target compound was isolated via preparatory thin-layer chromatography on silica gel using 10% EtOAc in Hexanes. (24 h, 92:8 *er* and 48 h, 91:9 *er*).

### -24 hours

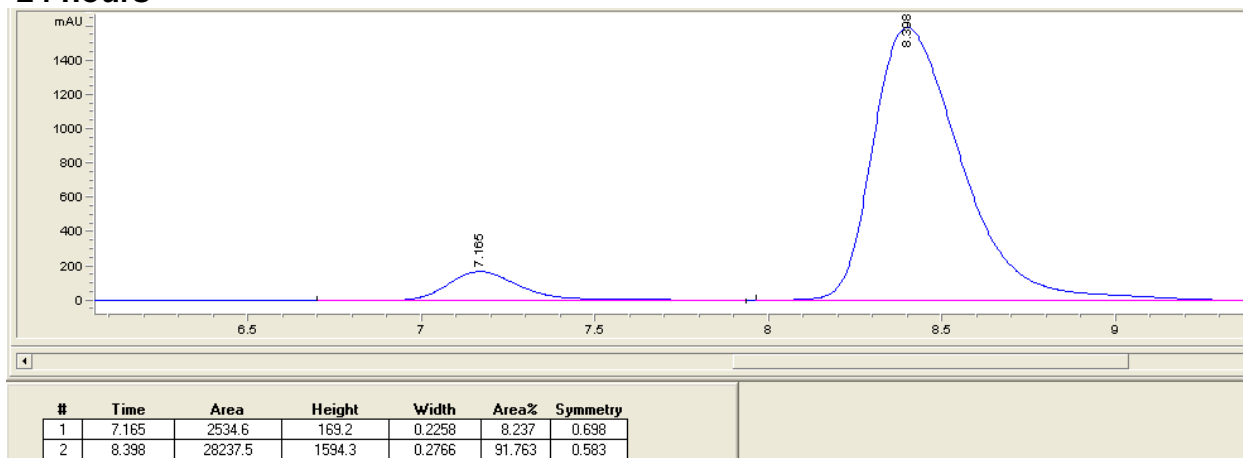

### -48 hours

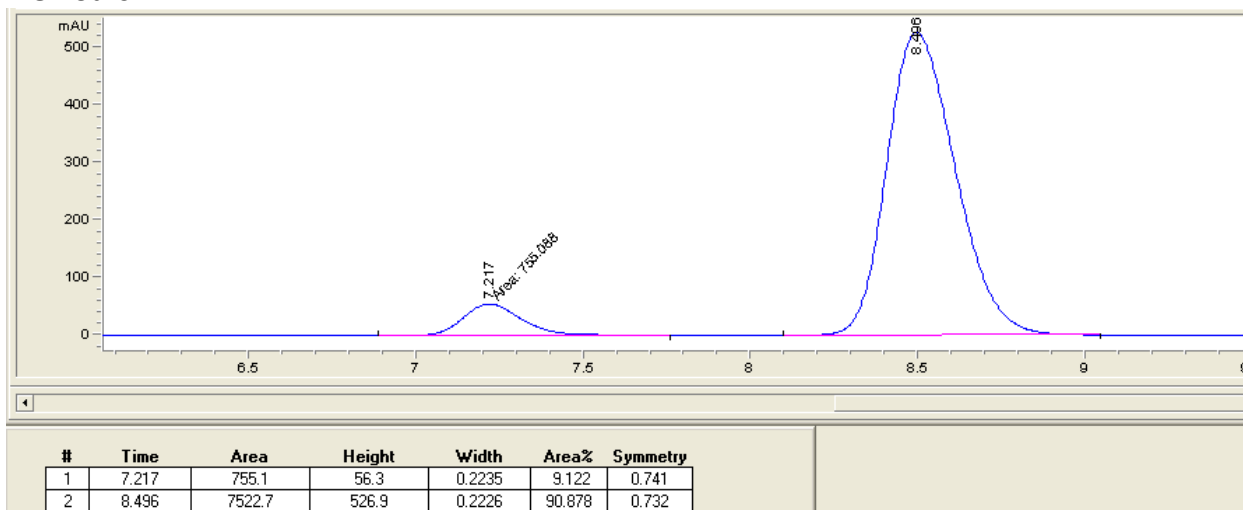

#### 4F. Rate studies

The kinetic profile of the reaction was determined using the variable time normalization analysis (VTNA) method described by Burés.<sup>6</sup> Rates were monitored using GCFID analysis with 1,3,5-trimethoxybenzene as a standard. DTBM-SEGPHOS was utilized to ensure full dissolution. 1,3,5-trimethoxybenzene was determined to have no effect on the reaction. Catalyst concentration was assumed to remain constant over the duration of the reaction. Integrals were calculated using the trapezoid rule approximation:

$$f(t_n) = \int_0^{t_n} [X]^x dt \approx \sum_{i=1}^n \left( \frac{[X]_i + [X]_{i-1}}{2} \right)^2 (t_i - t_{i-1})$$

#### Determination of the reaction order of pyrazole (1):

Representative procedure: In an N<sub>2</sub>-filled glovebox, solutions of **1a** (117.3 mg, 1.723 mmol) in CPME (0.300 mL), **2a** (120.6 mg, 926.3 μmol) in CPME (0.900 mL), [Pd(C<sub>3</sub>H<sub>5</sub>)Cl]<sub>2</sub> (5.5 mg, 15 μmol) and DTBM-SEGPHOS (35.7 mg, 30.3 μmol) in CPME (0.300 mL), and 1,3,5-trimethoxybenzene (51.3 mg, 305 μmol) in CPME (0.300 mL) were prepared. The catalyst solution was stirred for 30 minutes to establish complexation. An oven-dried 1-dram vial was charged with a stir bar, the catalyst solution (50.00 μL), **2a** solution (150.0 μL), 1,3,5-trimethoxybenzene solution (50.00 μL), **1a** solution (50.00 μL), and additional solvent (100.0 μL). The vial was sealed with a septa cap and removed from the glovebox. Using an N<sub>2</sub>-filled balloon, the vial was put under positive pressure and aliquots (approximately 25 μL) were taken every 30 minutes, quenched with methanol (approximately 0.5 mL), and diluted with ethyl acetate. The reaction is quenched in methanol. The amount of **3aa** was monitored using GCFID analysis. By visual analysis, it is concluded that the reaction rate is zero order with respect to pyrazole (**1**).

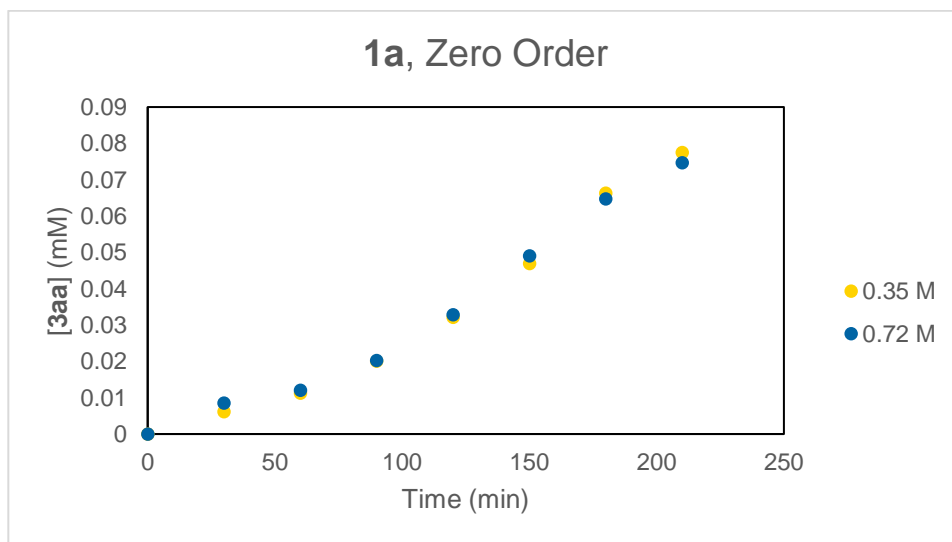



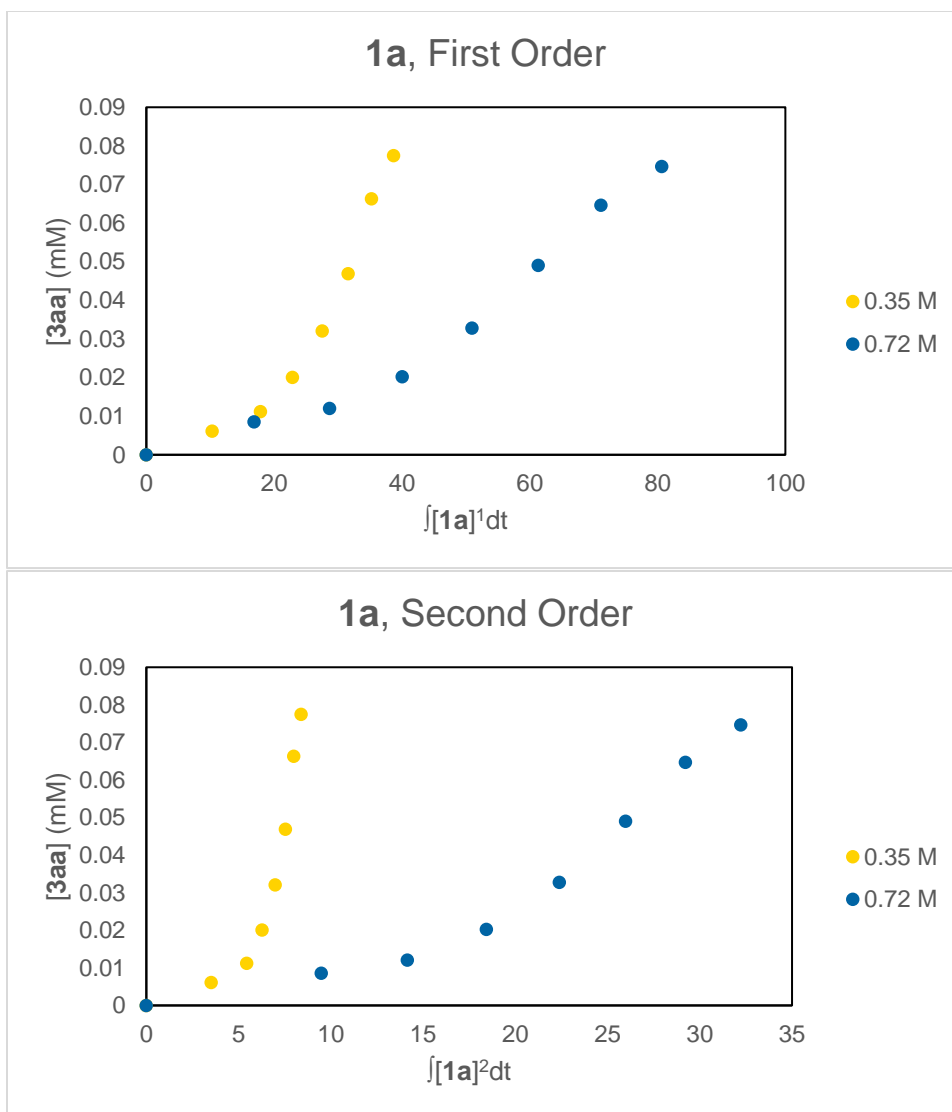

**Figure S6.** VTNA graphs for **1a** in zero, first, and second order. Overlay of the reaction profiles when using zero order analysis indicates that the reaction is zero order with respect to pyrazole (**1**).

**Determination of the reaction order of diene (2):**

Representative procedure: In an N<sub>2</sub>-filled glovebox, solutions of **1a** (119.9 mg, 1.761 mmol) in CPME (1.750 mL), **2a** (231.7 mg, 1.780 mmol) in CPME (1.750 mL), [Pd(C<sub>3</sub>H<sub>5</sub>)Cl]<sub>2</sub> (18.3 mg, 50.0 μmol) and DTBM-SEGPPOS (119.4 mg, 101.2 μmol) in CPME (1.000 mL), and 1,3,5-trimethoxybenzene (142.0 mg, 844.3 μmol) in CPME (0.800 mL) were prepared. The catalyst solution was stirred for 30 minutes to establish complexation. An oven-dried 1-dram vial was charged with a stir bar, the catalyst solution (100.0 μL), **2a** solution (200.0 μL), 1,3,5-trimethoxybenzene solution (100.0 μL), **1a** solution (200.0 μL), and additional CPME (200.0 μL). The vial was sealed with a septa cap and removed from the glovebox. Using an N<sub>2</sub>-filled balloon, the vial was put under positive pressure and aliquots (approximately 50 μL) were taken every 30 minutes, quenched with methanol (approximately 0.5 mL), and diluted with ethyl acetate. The

reaction is quenched in methanol. The amount of **3aa** was monitored using GCFID analysis. By visual analysis, it is concluded that the reaction rate is zero order with respect to diene (**2**).

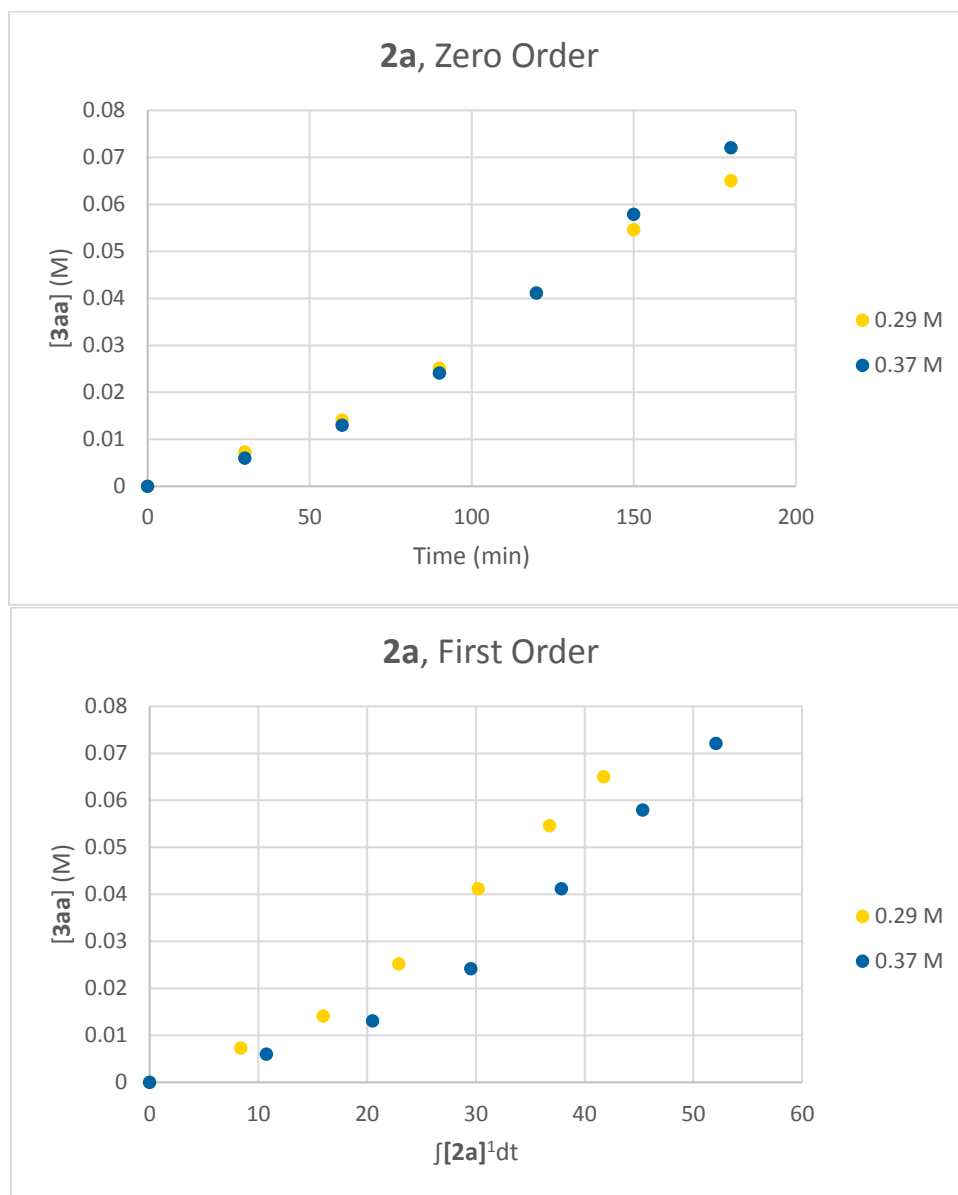

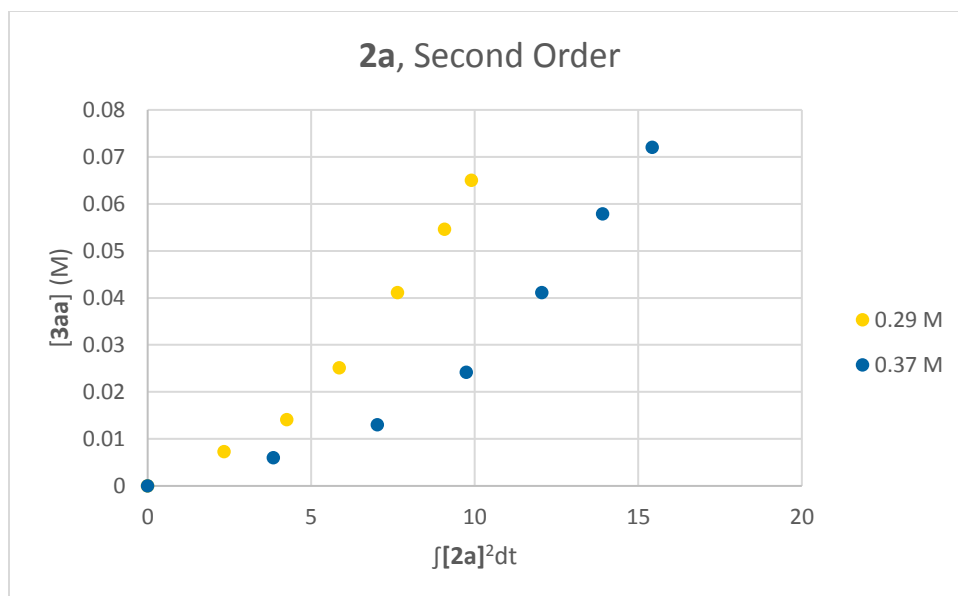

**Figure S7.** VTNA graphs for **2a** in zero, first, and second order. Overlay of the reaction profiles when using zero order analysis indicates that the reaction is zero order with respect to diene (**2**).

#### Determination of the reaction order of catalyst:

Representative procedure: In an N<sub>2</sub>-filled glovebox, solutions of **1c** (194.1 mg, 1.000 mmol) in CPME (1.000 mL), **2a** (132.4 mg, 1.017 mmol) in CPME (1.000 mL), [Pd(C<sub>3</sub>H<sub>5</sub>)Cl]<sub>2</sub> (11.0 mg, 30.1 μmol) and DTBM-SEGPHOS (72.0 mg, 61.0 μmol) in CPME (0.600 mL), and 1,3,5-trimethoxybenzene (68.0 mg, 404 μmol) in CPME (0.400 mL) were prepared. The catalyst solution was stirred for 30 minutes to establish complexation. An oven-dried 1- dram vial was charged with a stir bar, the catalyst solution (50.00 μL), **2a** solution (100.0 μL), 1,3,5-trimethoxybenzene solution (50.00 μL), **1a** solution (100.0 μL), and additional CPME (100.0 μL). The vial was sealed with a septa cap and removed from the glovebox. Using an N<sub>2</sub>-filled balloon, the vial was put under positive pressure and aliquots (approximately 25 μL) were taken every 30 minutes, quenched with methanol (approximately 0.5 mL), and diluted with ethyl acetate. The reaction is quenched in methanol. The amount of **3ac** was monitored using GCFID analysis. By visual analysis, it is concluded that the reaction rate is first order with respect to catalyst.

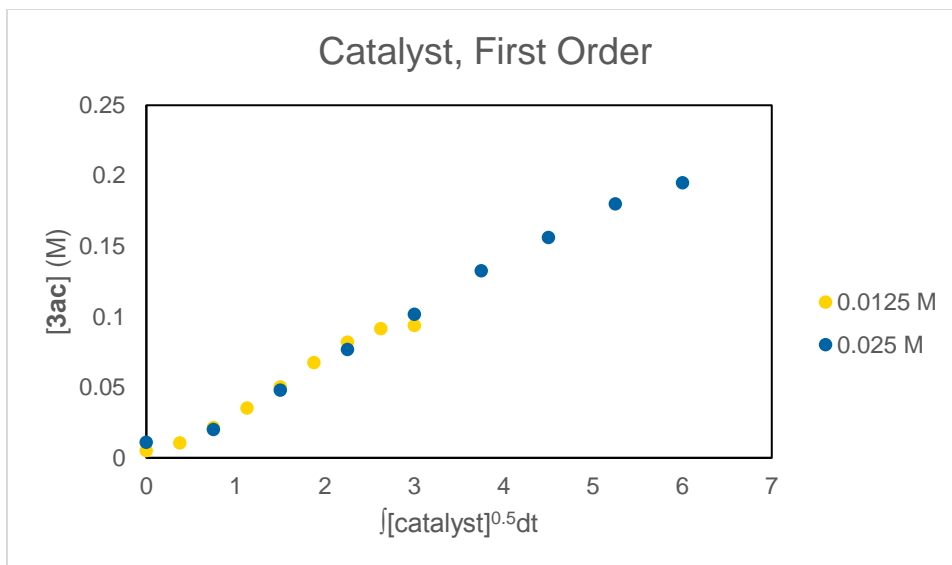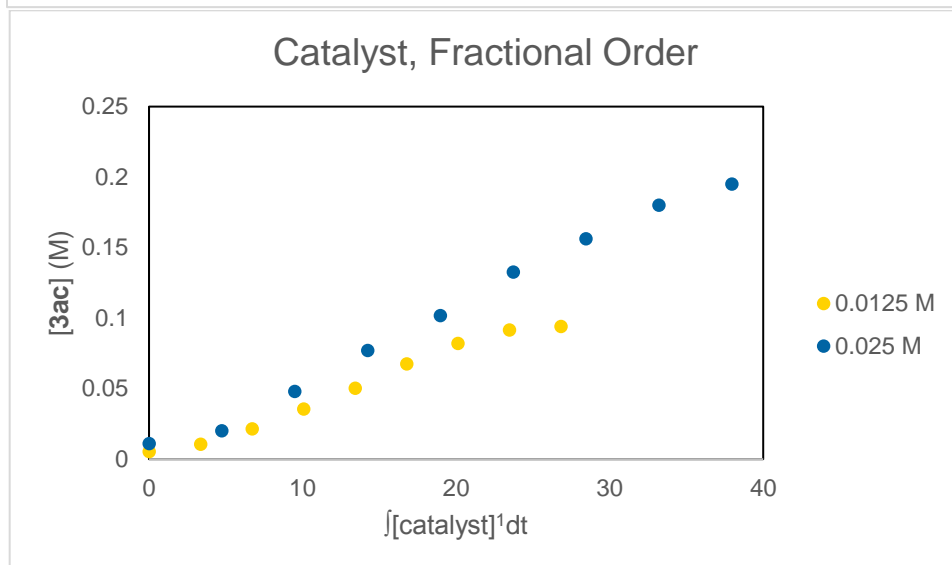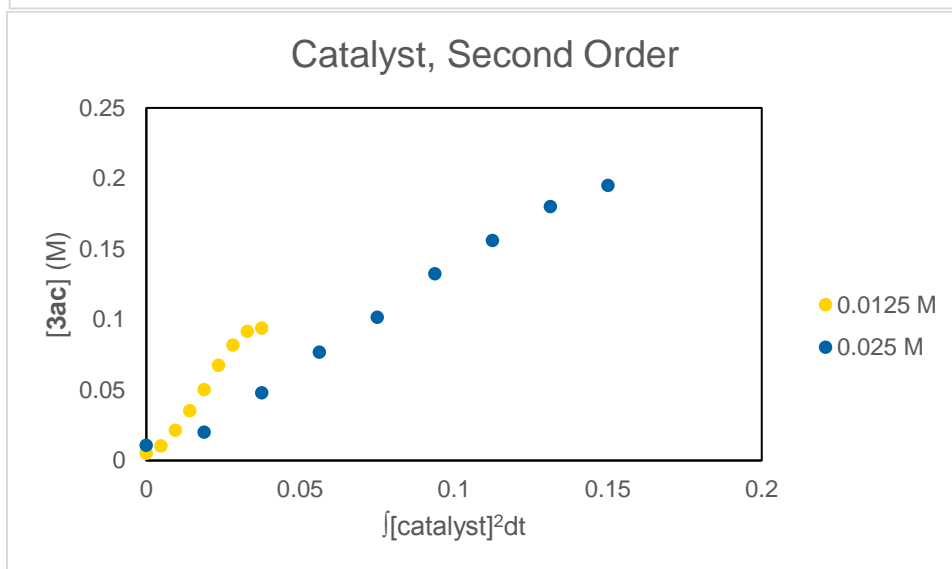

**Figure S8.** VTNA graphs for catalyst in first, fractional, and second order. Overlay of the reaction profiles when using first order analysis indicates that the reaction is first order with respect to catalyst.

## 5. ECD Studies

Experimental ECD data was obtained using a Jasco J-810 spectropolarimeter. Solutions of pure **3aa** (0.86 mM) and **3ab** (0.38 mM) in acetonitrile were made. Spectra were obtained using a 1.00 mm quartz cuvette. Data was smoothed using a Savitsky-Golay filter with a convolution width of 9. Ground state and time-dependent density functional theory (TDDFT) results were obtained using Turbomole V7.5.<sup>7</sup> Ground state geometry structure optimizations were performed using the B3-LYP hybrid density functional<sup>8</sup> and the conductor-like screening model (COSMO) with the dielectric constant of acetonitrile ( $\epsilon = 37.5$ ).<sup>9</sup> The split valence polarization basis set def2-SVP,<sup>10</sup> the Resolution-of-the-identity approximation (RI),<sup>11</sup> and a DFT quadrature grid of size m3<sup>12</sup> were used. ECD spectra were acquired using TDDFT<sup>13</sup> using the same parameters, and the RPA singlet approximation.<sup>14</sup> CD spectra were simulated using the TmoleX built-in Gaussian line broadening.

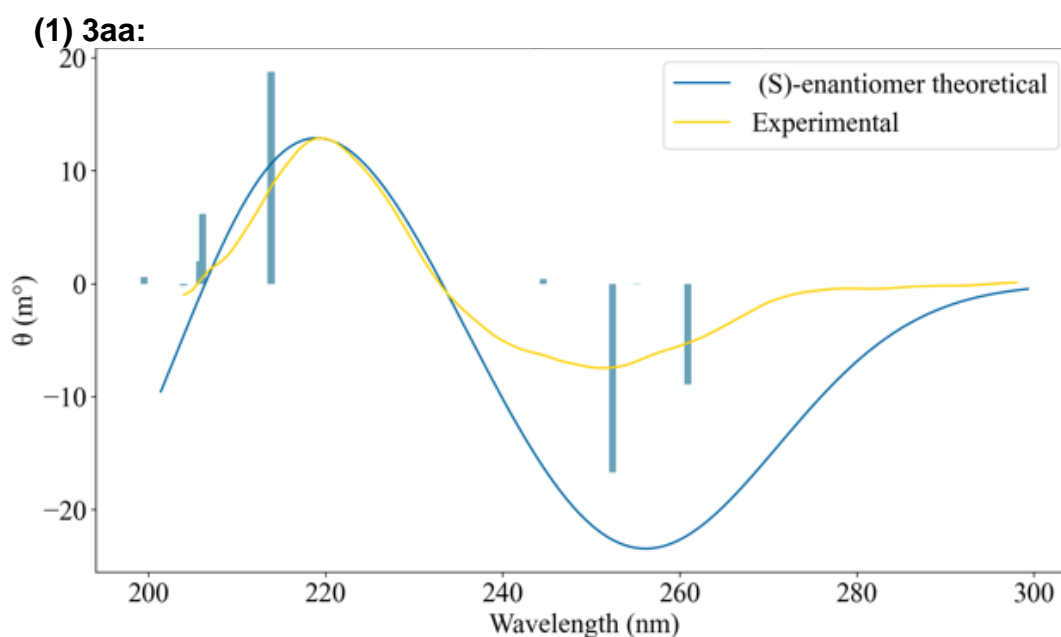

**Figure S9.** Computational results for the (*S*)-enantiomer and the experimental spectrum of **3aa**. Theoretical data was scaled to match the maximum of the experimental data, and fitting functions were performed using Gaussian statistics in TmoleX. Experimental data was smoothed using a Savitzky-Golay filter.

### Experimental Data

| Raw data   |           | Smoothed data |          |
|------------|-----------|---------------|----------|
| Wavelength | mDeg      | Wavelength    | mDeg     |
| 300        | 0.118266  | 300           | 0.103899 |
| 299        | 0.0595256 | 299           | 0.108234 |
| 298        | 0.094574  | 298           | 0.10815  |
| 297        | 0.122371  | 297           | 0.086314 |

|     |            |     |            |
|-----|------------|-----|------------|
| 296 | 0.0839991  | 296 | 0.0332798  |
| 295 | -0.0125534 | 295 | -0.0184225 |
| 294 | -0.12836   | 294 | -0.0726643 |
| 293 | -0.184223  | 293 | -0.132071  |
| 292 | -0.111836  | 292 | -0.162778  |
| 291 | -0.132594  | 291 | -0.167789  |
| 290 | -0.220407  | 290 | -0.165686  |
| 289 | -0.165311  | 289 | -0.18362   |
| 288 | -0.188607  | 288 | -0.199179  |
| 287 | -0.229075  | 287 | -0.213897  |
| 286 | -0.267876  | 286 | -0.253965  |
| 285 | -0.236964  | 285 | -0.322966  |
| 284 | -0.394409  | 284 | -0.377357  |
| 283 | -0.488905  | 283 | -0.41627   |
| 282 | -0.455862  | 282 | -0.436875  |
| 281 | -0.41388   | 281 | -0.447855  |
| 280 | -0.407814  | 280 | -0.422846  |
| 279 | -0.411125  | 279 | -0.411312  |
| 278 | -0.450605  | 278 | -0.425625  |
| 277 | -0.455146  | 277 | -0.470919  |
| 276 | -0.534294  | 276 | -0.549352  |
| 275 | -0.623099  | 275 | -0.643884  |
| 274 | -0.796748  | 274 | -0.744416  |
| 273 | -0.941092  | 273 | -0.897491  |
| 272 | -1.04105   | 272 | -1.09668   |
| 271 | -1.26689   | 271 | -1.34299   |
| 270 | -1.69516   | 270 | -1.64289   |
| 269 | -2.03852   | 269 | -2.0192    |
| 268 | -2.40704   | 268 | -2.44419   |
| 267 | -2.86878   | 267 | -2.86895   |
| 266 | -3.33725   | 266 | -3.30413   |
| 265 | -3.72291   | 265 | -3.72512   |
| 264 | -4.12674   | 264 | -4.15557   |
| 263 | -4.58666   | 263 | -4.54439   |
| 262 | -4.83647   | 262 | -4.9031    |
| 261 | -5.31273   | 261 | -5.21036   |
| 260 | -5.47747   | 260 | -5.48588   |
| 259 | -5.73449   | 259 | -5.73592   |
| 258 | -5.91373   | 258 | -5.97953   |

|     |           |     |          |
|-----|-----------|-----|----------|
| 257 | -6.27245  | 257 | -6.2459  |
| 256 | -6.52884  | 256 | -6.56445 |
| 255 | -6.81323  | 255 | -6.89077 |
| 254 | -7.25983  | 254 | -7.17926 |
| 253 | -7.39457  | 253 | -7.35118 |
| 252 | -7.52326  | 252 | -7.43241 |
| 251 | -7.4051   | 251 | -7.45159 |
| 250 | -7.26053  | 250 | -7.3897  |
| 249 | -7.25183  | 249 | -7.25427 |
| 248 | -7.25083  | 248 | -7.0788  |
| 247 | -6.91377  | 247 | -6.91122 |
| 246 | -6.51791  | 246 | -6.67112 |
| 245 | -6.45059  | 245 | -6.40513 |
| 244 | -6.23275  | 244 | -6.19167 |
| 243 | -5.84404  | 243 | -5.9988  |
| 242 | -5.80637  | 242 | -5.77114 |
| 241 | -5.60015  | 241 | -5.4349  |
| 240 | -4.99719  | 240 | -5.0344  |
| 239 | -4.53283  | 239 | -4.56441 |
| 238 | -3.91849  | 238 | -3.95407 |
| 237 | -3.31868  | 237 | -3.29352 |
| 236 | -2.65372  | 236 | -2.62159 |
| 235 | -1.81215  | 235 | -1.89876 |
| 234 | -1.0479   | 234 | -1.09911 |
| 233 | -0.208641 | 233 | -0.12422 |
| 232 | 0.801196  | 232 | 0.972108 |
| 231 | 2.18052   | 231 | 2.17615  |
| 230 | 3.66916   | 230 | 3.51776  |
| 229 | 4.82562   | 229 | 4.87199  |
| 228 | 6.15909   | 228 | 6.16808  |
| 227 | 7.47779   | 227 | 7.40626  |
| 226 | 8.44928   | 226 | 8.52717  |
| 225 | 9.55094   | 225 | 9.55862  |
| 224 | 10.618    | 224 | 10.4541  |
| 223 | 11.1482   | 223 | 11.2504  |
| 222 | 11.8653   | 222 | 11.9914  |
| 221 | 12.5007   | 221 | 12.5786  |
| 220 | 12.9499   | 220 | 12.8516  |
| 219 | 13.122    | 219 | 12.886   |



|     |          |     |          |
|-----|----------|-----|----------|
| 218 | 12.677   | 218 | 12.5641  |
| 217 | 11.6193  | 217 | 11.8931  |
| 216 | 11.0413  | 216 | 10.9588  |
| 215 | 9.93503  | 215 | 9.94056  |
| 214 | 8.67889  | 214 | 8.80083  |
| 213 | 7.54987  | 213 | 7.38001  |
| 212 | 6.39214  | 212 | 6.02996  |
| 211 | 4.46635  | 211 | 4.81436  |
| 210 | 2.95882  | 210 | 3.61688  |
| 209 | 3.24508  | 209 | 2.53754  |
| 208 | 1.88644  | 208 | 1.84964  |
| 207 | 0.791935 | 207 | 1.34491  |
| 206 | 0.613372 | 206 | 0.473079 |

### Theoretical data

| Wavelength | Rotatory strength |
|------------|-------------------|
| 173.507426 | 0.548119          |
| 174.263315 | -4.5555945        |
| 174.370493 | 0.61602423        |
| 175.618448 | 1.12900225        |
| 180.044076 | 10.9937404        |
| 180.220756 | -10.292896        |
| 183.722704 | -0.1195331        |
| 185.119829 | -10.294263        |
| 188.665581 | 28.3519989        |
| 190.802257 | -56.224584        |
| 194.572165 | -8.0373511        |
| 208.203526 | 12.2305626        |
| 213.213617 | 8.49286052        |
| 216.077808 | 0.41977558        |
| 220.112104 | 1.73034454        |
| 250.894691 | -17.055073        |
| 256.797743 | -0.1901558        |
| 263.539188 | -9.2875019        |
| 268.3673   | 5.44434419        |

**(1) 3ab**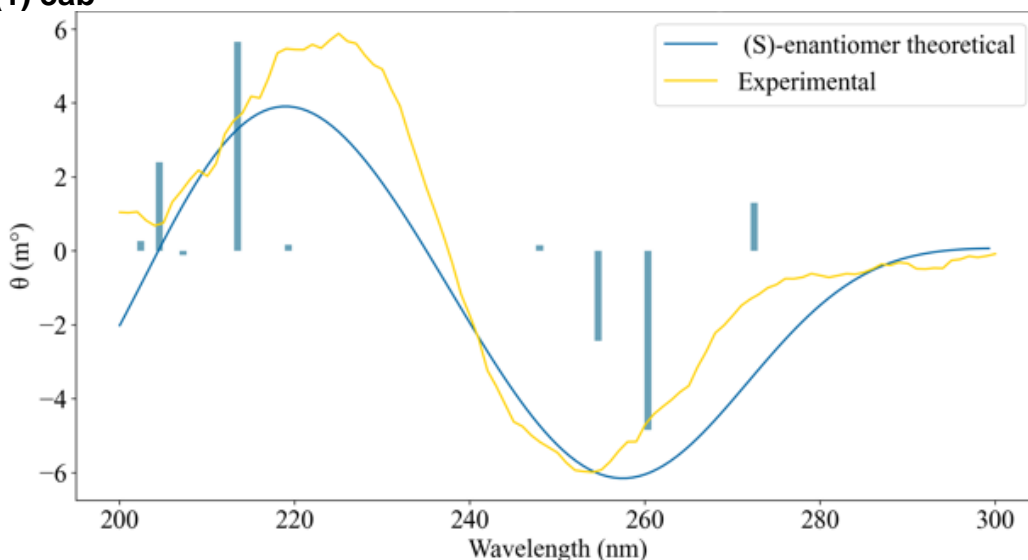

**Figure S10.** Computational results for the (*S*)-enantiomer and the experimental spectrum of **3ab**. Theoretical data was scaled to match the maximum of the experimental data, and fitting functions were performed using Gaussian statistics in TmoleX. Experimental data was smoothed using a Savitzky-Golay filter.

**Experimental Data**

| raw        |            | smooth     |            |
|------------|------------|------------|------------|
| wavelength | mDeg       | wavelength | mDeg       |
| 300        | -0.0990612 | 300        | -0.0794332 |
| 299        | -0.119451  | 299        | -0.136095  |
| 298        | -0.131108  | 298        | -0.173826  |
| 297        | -0.179289  | 297        | -0.141294  |
| 296        | -0.242963  | 296        | -0.225768  |
| 295        | -0.31314   | 295        | -0.253591  |
| 294        | -0.399159  | 294        | -0.468848  |
| 293        | -0.459209  | 293        | -0.462111  |
| 292        | -0.460231  | 292        | -0.490033  |
| 291        | -0.443227  | 291        | -0.481172  |
| 290        | -0.382671  | 290        | -0.337368  |
| 289        | -0.355291  | 289        | -0.3114    |
| 288        | -0.356764  | 288        | -0.387955  |
| 287        | -0.404821  | 287        | -0.358103  |
| 286        | -0.479597  | 286        | -0.485019  |
| 285        | -0.543523  | 285        | -0.578378  |
| 284        | -0.603879  | 284        | -0.630772  |
| 283        | -0.659853  | 283        | -0.61456   |

|     |           |     |           |
|-----|-----------|-----|-----------|
| 282 | -0.662794 | 282 | -0.667067 |
| 281 | -0.660851 | 281 | -0.713714 |
| 280 | -0.669435 | 280 | -0.663237 |
| 279 | -0.672248 | 279 | -0.612545 |
| 278 | -0.686135 | 278 | -0.711057 |
| 277 | -0.720005 | 277 | -0.751699 |
| 276 | -0.797887 | 276 | -0.749413 |
| 275 | -0.898285 | 275 | -0.911375 |
| 274 | -0.99976  | 274 | -0.998123 |
| 273 | -1.14083  | 273 | -1.17135  |
| 272 | -1.32414  | 272 | -1.30542  |
| 271 | -1.49549  | 271 | -1.4762   |
| 270 | -1.71886  | 270 | -1.75279  |
| 269 | -1.9823   | 269 | -2.01565  |
| 268 | -2.34358  | 268 | -2.22081  |
| 267 | -2.73865  | 267 | -2.71431  |
| 266 | -3.13142  | 266 | -3.13706  |
| 265 | -3.50138  | 265 | -3.64818  |
| 264 | -3.81402  | 264 | -3.81474  |
| 263 | -4.02816  | 263 | -4.0322   |
| 262 | -4.26899  | 262 | -4.21668  |
| 261 | -4.48538  | 261 | -4.4158   |
| 260 | -4.72992  | 260 | -4.70245  |
| 259 | -4.97872  | 259 | -5.15903  |
| 258 | -5.24509  | 258 | -5.16349  |
| 257 | -5.49707  | 257 | -5.4088   |
| 256 | -5.69582  | 256 | -5.70305  |
| 255 | -5.84904  | 255 | -5.9247   |
| 254 | -5.98265  | 254 | -5.98681  |
| 253 | -5.97909  | 253 | -5.96538  |
| 252 | -5.87391  | 252 | -5.9336   |
| 251 | -5.71448  | 251 | -5.72825  |
| 250 | -5.5384   | 250 | -5.45753  |
| 249 | -5.33613  | 249 | -5.31509  |
| 248 | -5.16374  | 248 | -5.17086  |
| 247 | -4.99889  | 247 | -4.98904  |
| 246 | -4.78532  | 246 | -4.74646  |
| 245 | -4.52836  | 245 | -4.62376  |
| 244 | -4.15799  | 244 | -4.14079  |

|     |           |     |           |
|-----|-----------|-----|-----------|
| 243 | -3.6746   | 243 | -3.65924  |
| 242 | -3.12257  | 242 | -3.23388  |
| 241 | -2.47959  | 241 | -2.38066  |
| 240 | -1.8047   | 240 | -1.75779  |
| 239 | -1.08203  | 239 | -1.1789   |
| 238 | -0.353087 | 238 | -0.345066 |
| 237 | 0.338383  | 237 | 0.399333  |
| 236 | 1.05125   | 236 | 1.08091   |
| 235 | 1.79263   | 235 | 1.72716   |
| 234 | 2.48607   | 234 | 2.45103   |
| 233 | 3.19631   | 233 | 3.15292   |
| 232 | 3.8378    | 232 | 3.92606   |
| 231 | 4.37056   | 231 | 4.37892   |
| 230 | 4.80623   | 230 | 4.91751   |
| 229 | 5.12092   | 229 | 5.03657   |
| 228 | 5.37692   | 228 | 5.2948    |
| 227 | 5.58881   | 227 | 5.61287   |
| 226 | 5.67743   | 226 | 5.67587   |
| 225 | 5.74393   | 225 | 5.88504   |
| 224 | 5.71013   | 224 | 5.70396   |
| 223 | 5.62048   | 223 | 5.48788   |
| 222 | 5.55165   | 222 | 5.58586   |
| 221 | 5.53083   | 221 | 5.44627   |
| 220 | 5.51393   | 220 | 5.45129   |
| 219 | 5.34499   | 219 | 5.4731    |
| 218 | 5.09902   | 218 | 5.35495   |
| 217 | 4.78765   | 217 | 4.68716   |
| 216 | 4.42612   | 216 | 4.13866   |
| 215 | 4.09682   | 215 | 4.18374   |
| 214 | 3.74224   | 214 | 3.72608   |
| 213 | 3.36442   | 213 | 3.52278   |
| 212 | 2.98971   | 212 | 3.16205   |
| 211 | 2.59616   | 211 | 2.36486   |
| 210 | 2.29176   | 210 | 2.02546   |
| 209 | 2.03527   | 209 | 2.18497   |
| 208 | 1.78379   | 208 | 1.92524   |
| 207 | 1.54158   | 207 | 1.60958   |
| 206 | 1.23491   | 206 | 1.32408   |
| 205 | 0.963603  | 205 | 0.758729  |

|     |          |     |          |
|-----|----------|-----|----------|
| 204 | 0.838812 | 204 | 0.685622 |
| 203 | 0.824622 | 203 | 0.82957  |
| 202 | 0.892495 | 202 | 1.05897  |
| 201 | 1.01393  | 201 | 1.0342   |
| 200 | 1.06538  | 200 | 1.04648  |

### Theoretical data

| wavelength | rotatory strength |
|------------|-------------------|
| 172.843139 | -0.3568048        |
| 175.708929 | -0.9051742        |
| 175.87822  | 2.19564809        |
| 175.963168 | -11.610989        |
| 177.583501 | 0.94857959        |
| 179.676693 | 0.39707566        |
| 182.410037 | -6.1617676        |
| 182.801104 | -1.876557         |
| 190.677006 | -4.84516          |
| 194.953025 | 1.70702447        |
| 198.934191 | -34.72199         |
| 202.418195 | 1.42821712        |
| 204.536209 | 12.5613761        |
| 207.236496 | -0.5691502        |
| 213.477117 | 29.5821057        |
| 219.238049 | 0.84861878        |
| 247.960614 | 0.80822344        |
| 254.651128 | -12.747652        |
| 260.320093 | -25.332058        |
| 272.483443 | 6.82050656        |



### (S, E)-4-methyl-1-(4-phenylbut-3-en-2-yl)-1H-pyrazole (3ab)

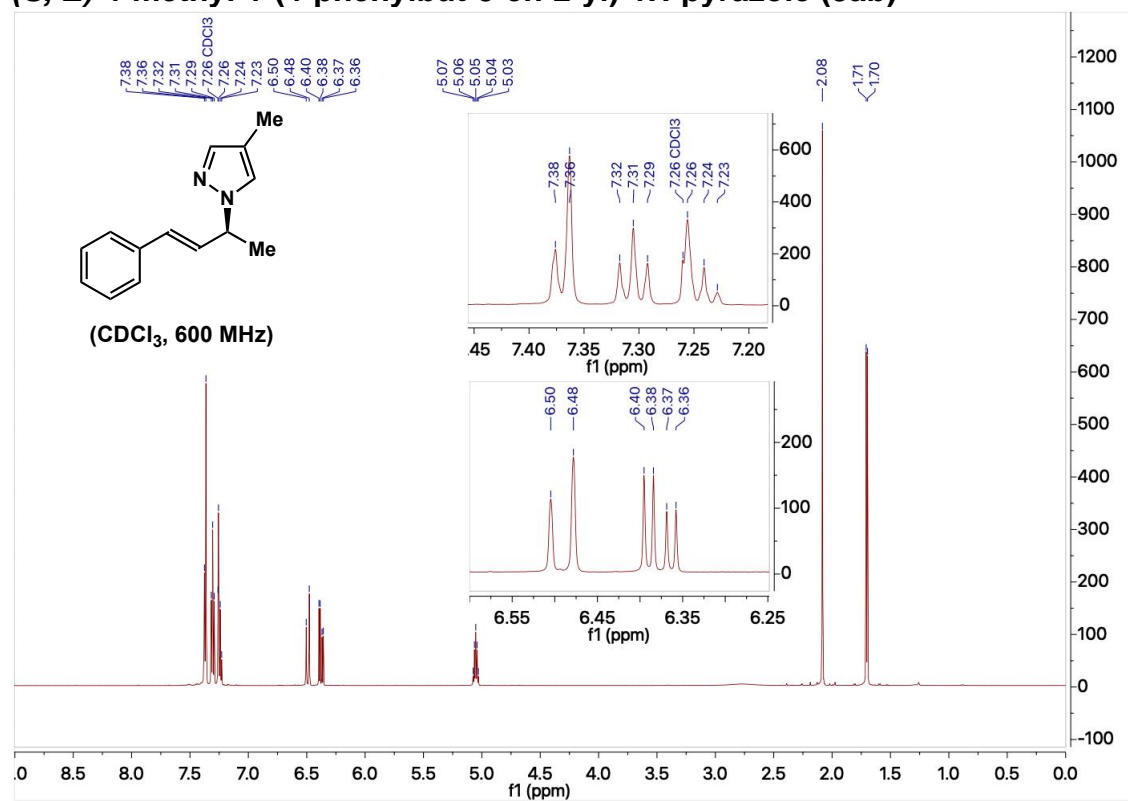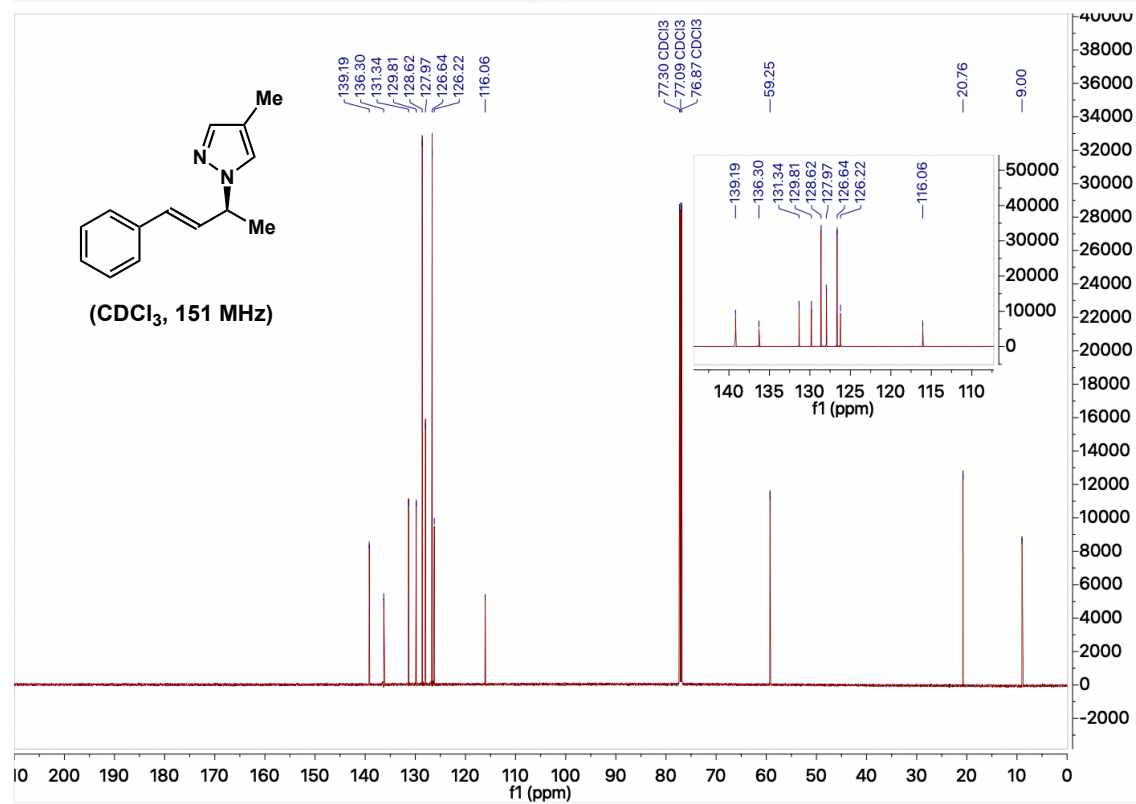

**(S, E)-1-(4-phenylbut-3-en-2-yl)-4-(4,4,5,5-tetramethyl-1,3,2-dioxaborolan-2-yl)-1H-pyrazole (3ac)**

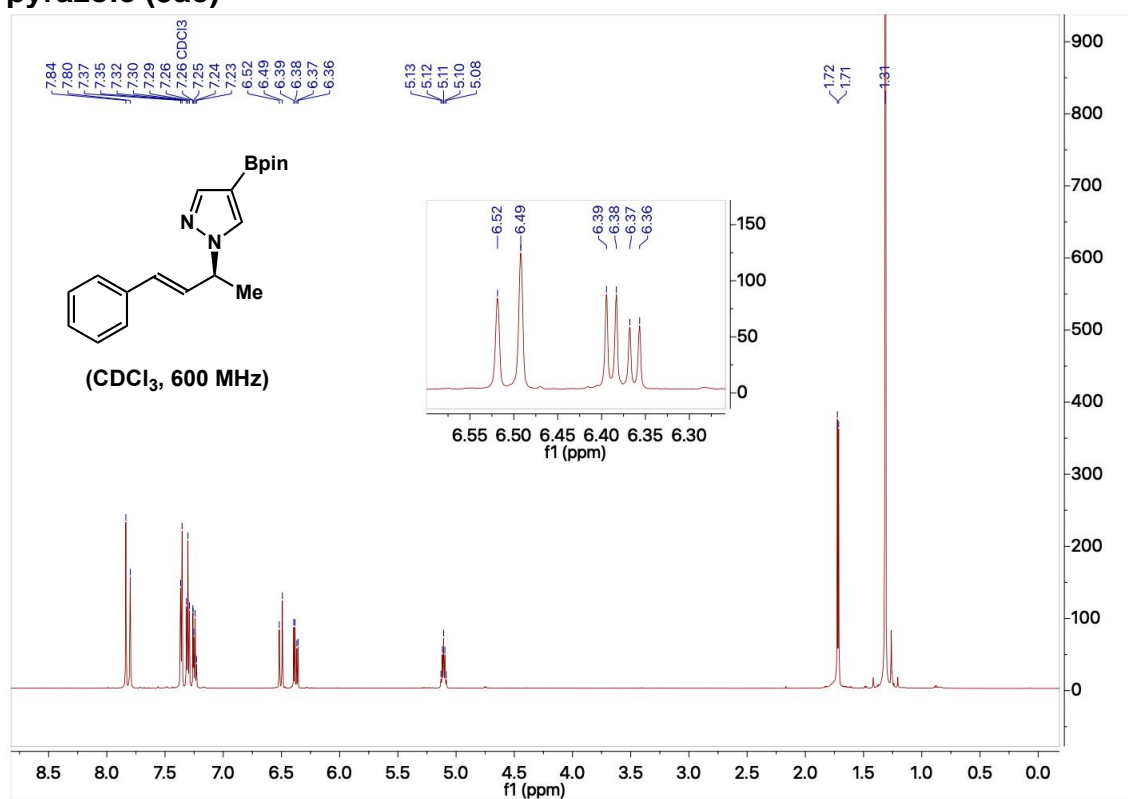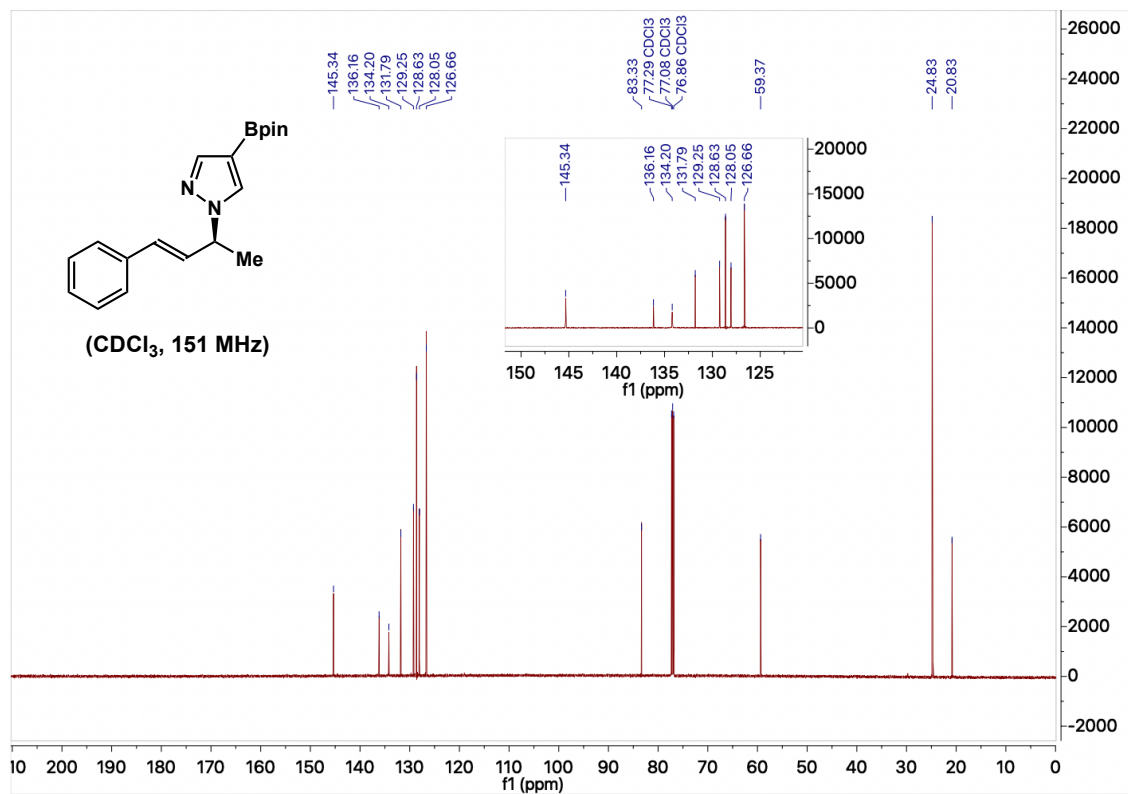



**(S, E)-4-chloro-1-(4-phenylbut-3-en-2-yl)-1H-pyrazole (3ad)**

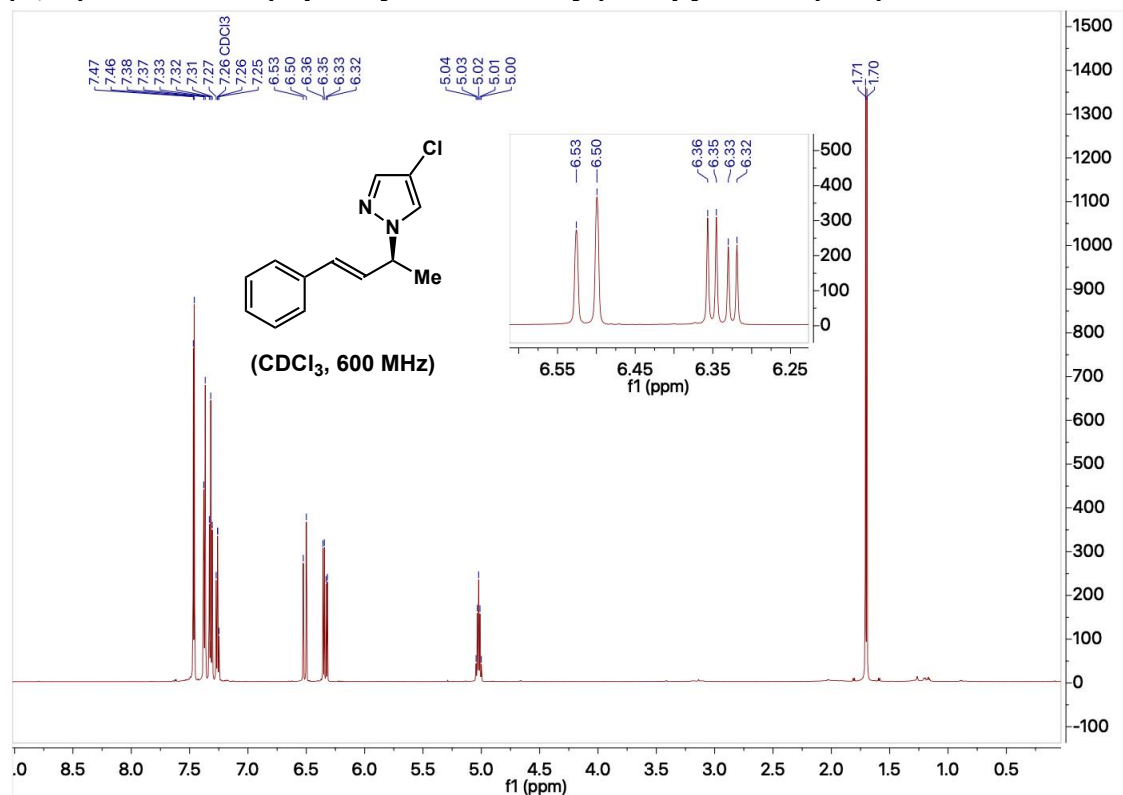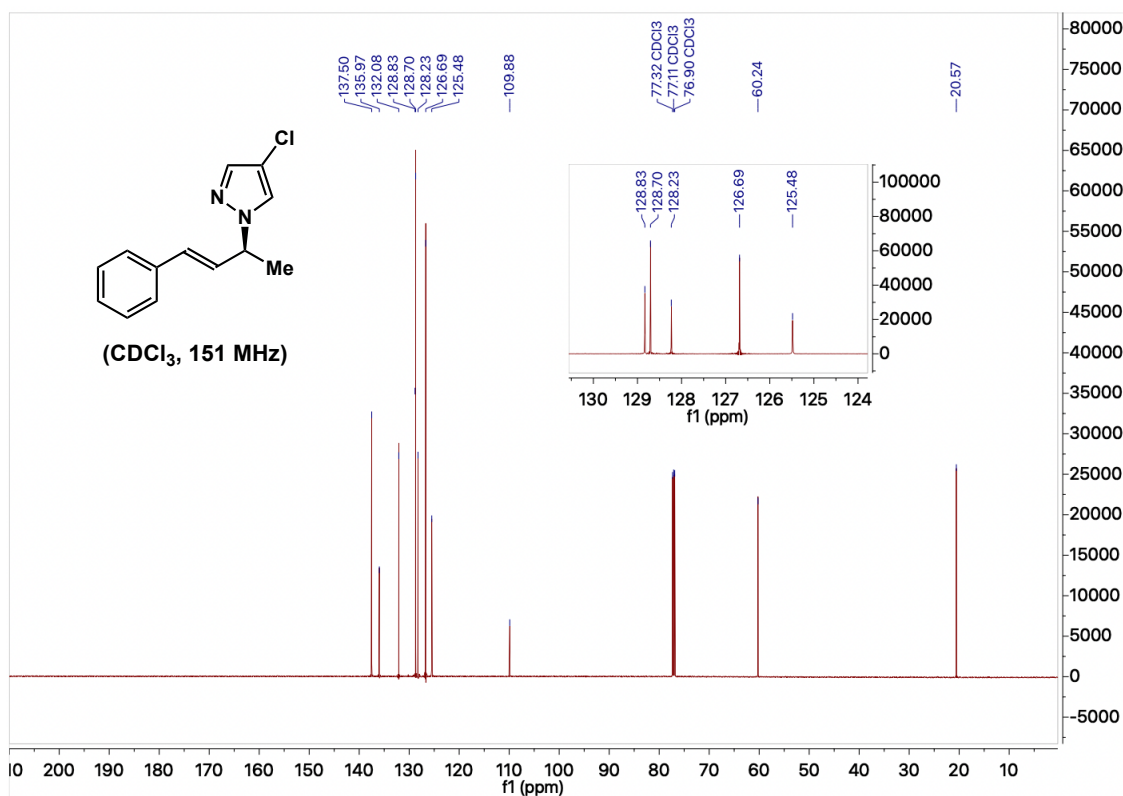

**(S, E)-4-bromo-1-(4-phenylbut-3-en-2-yl)-1H-pyrazole (3ae)**

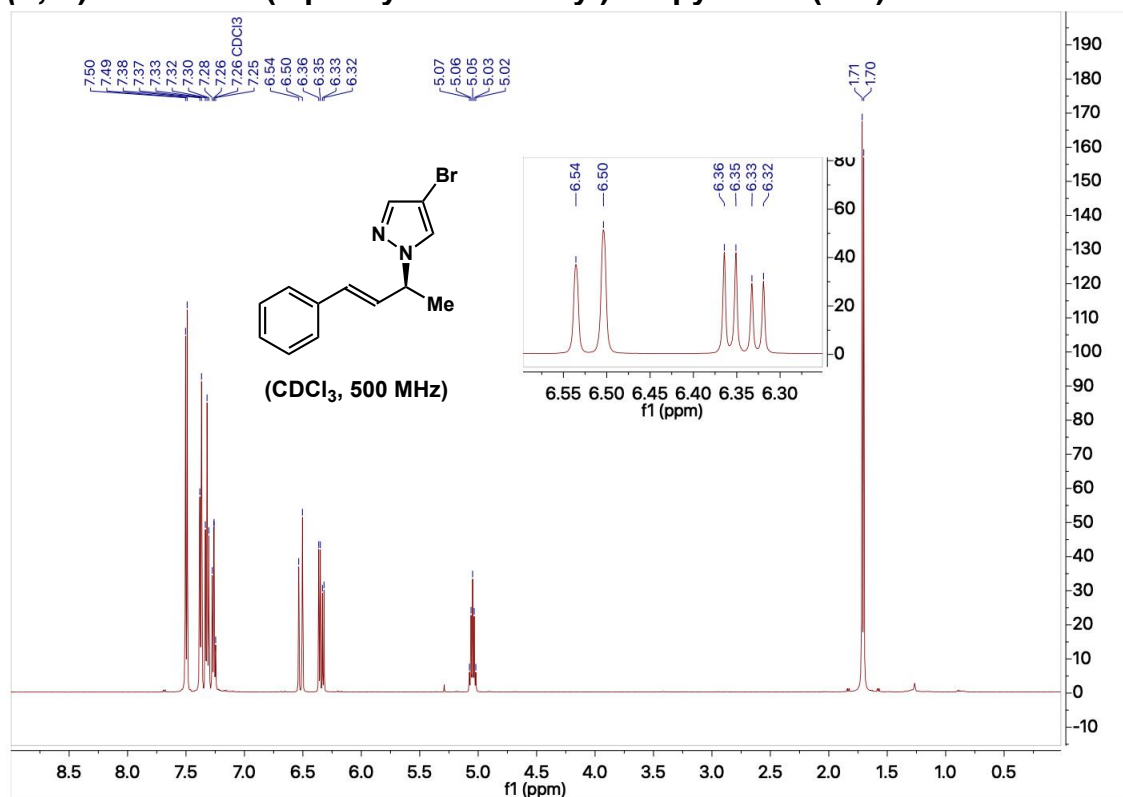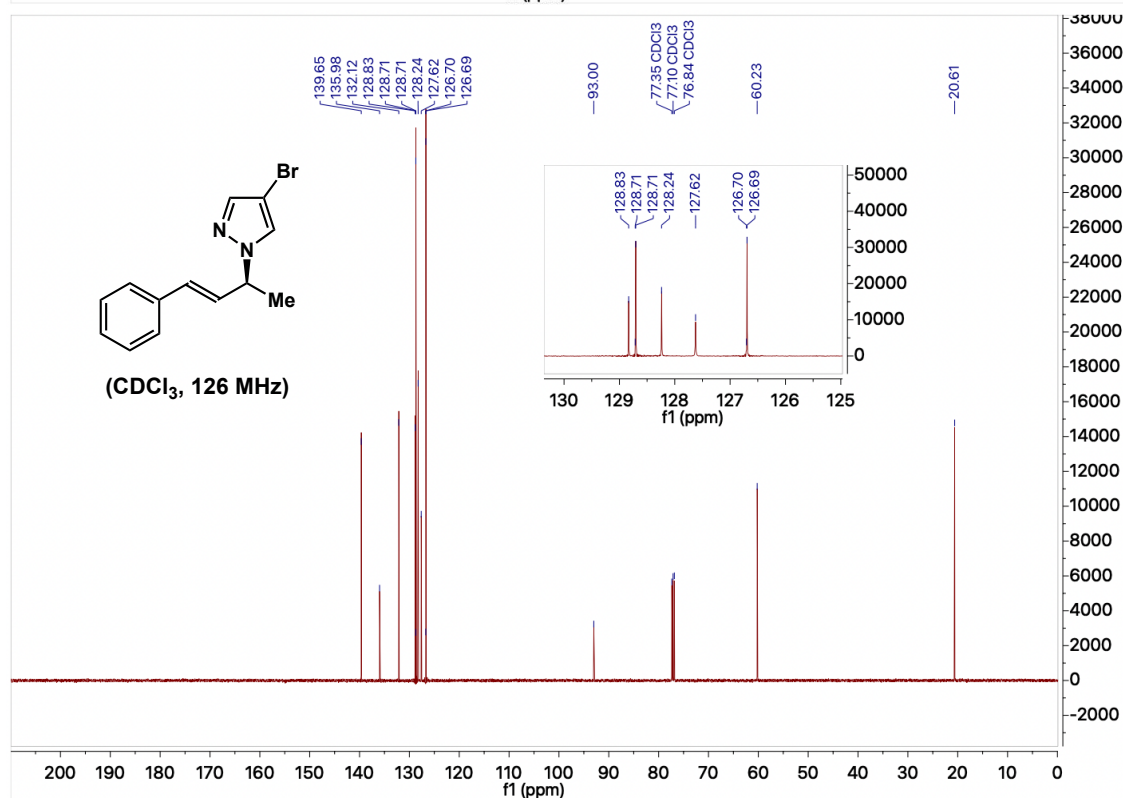

**Ethyl (S, E)-1-(4-phenylbut-3-en-2-yl)-1H-pyrazole-4-carboxylate (3af)**

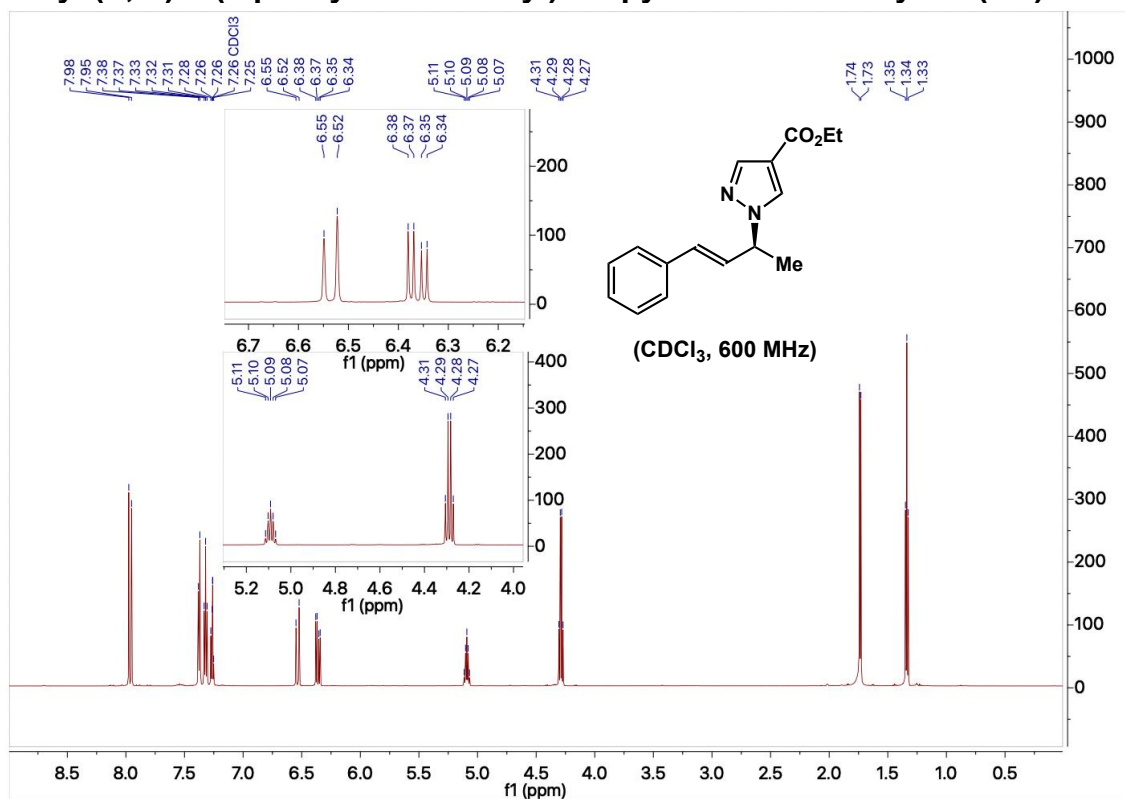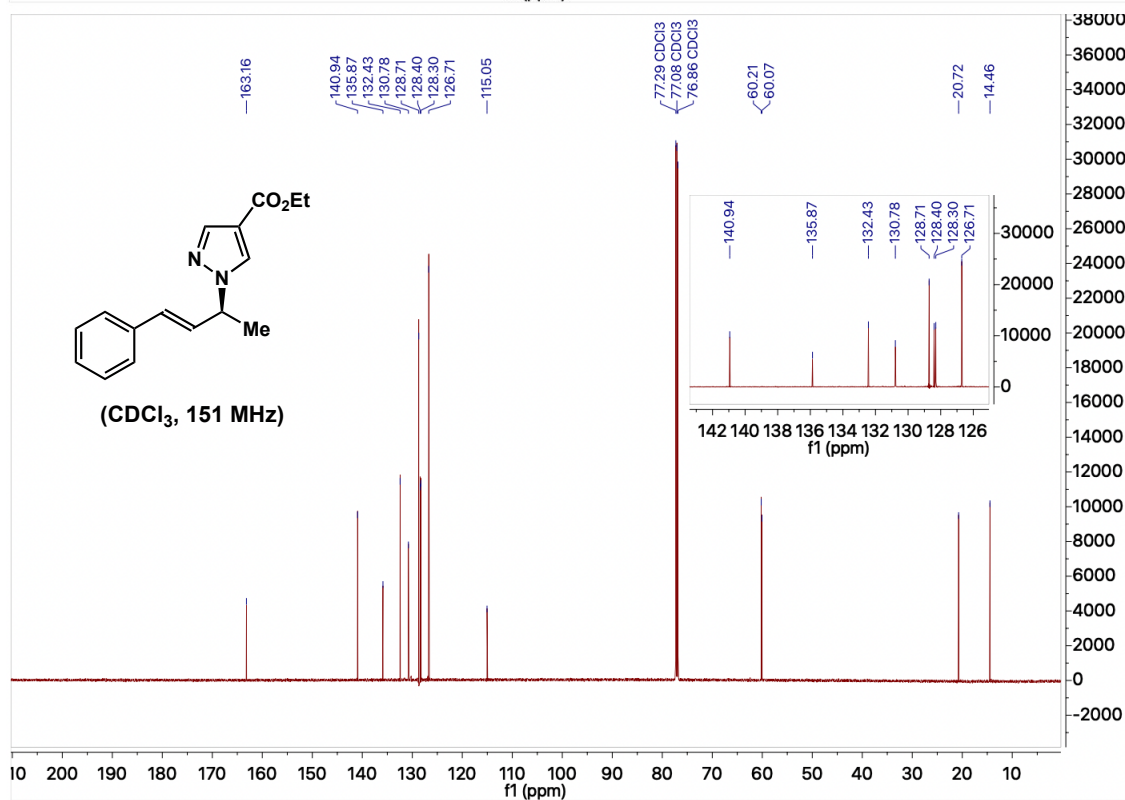



**(S, E)-1-(4-phenylbut-3-en-2-yl)-1H-pyrazole-4-carbonitrile (3ah)**

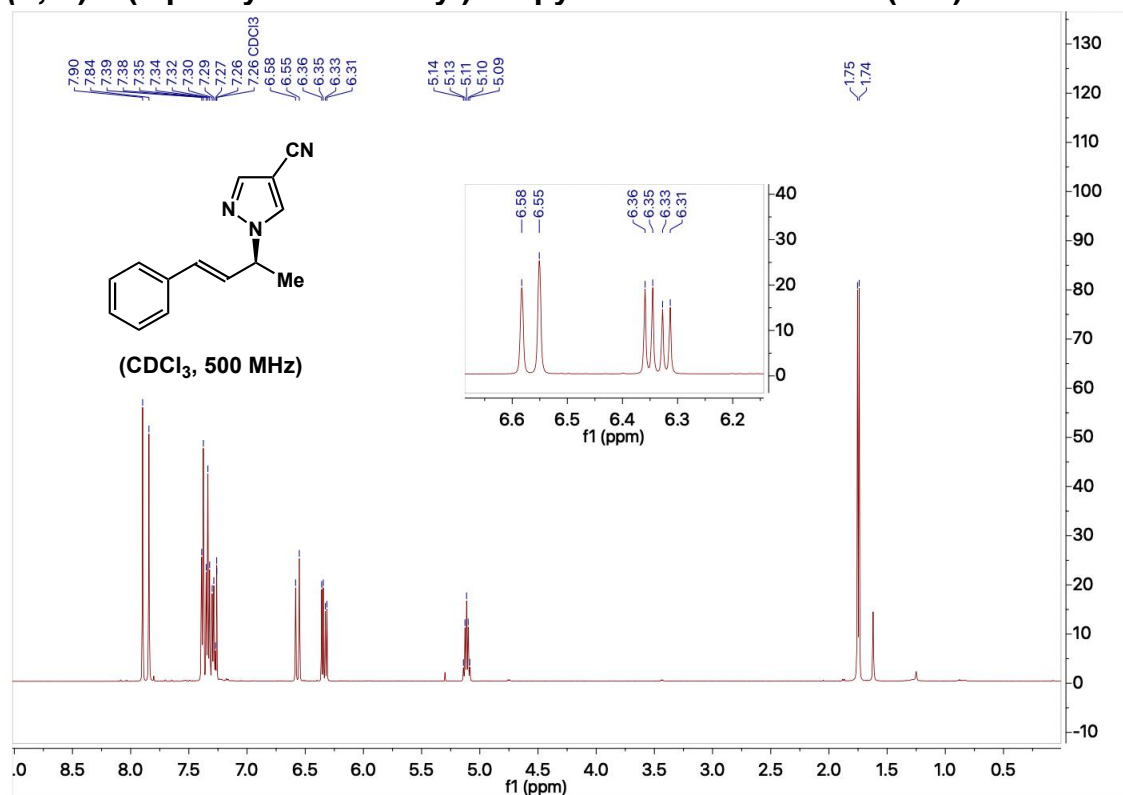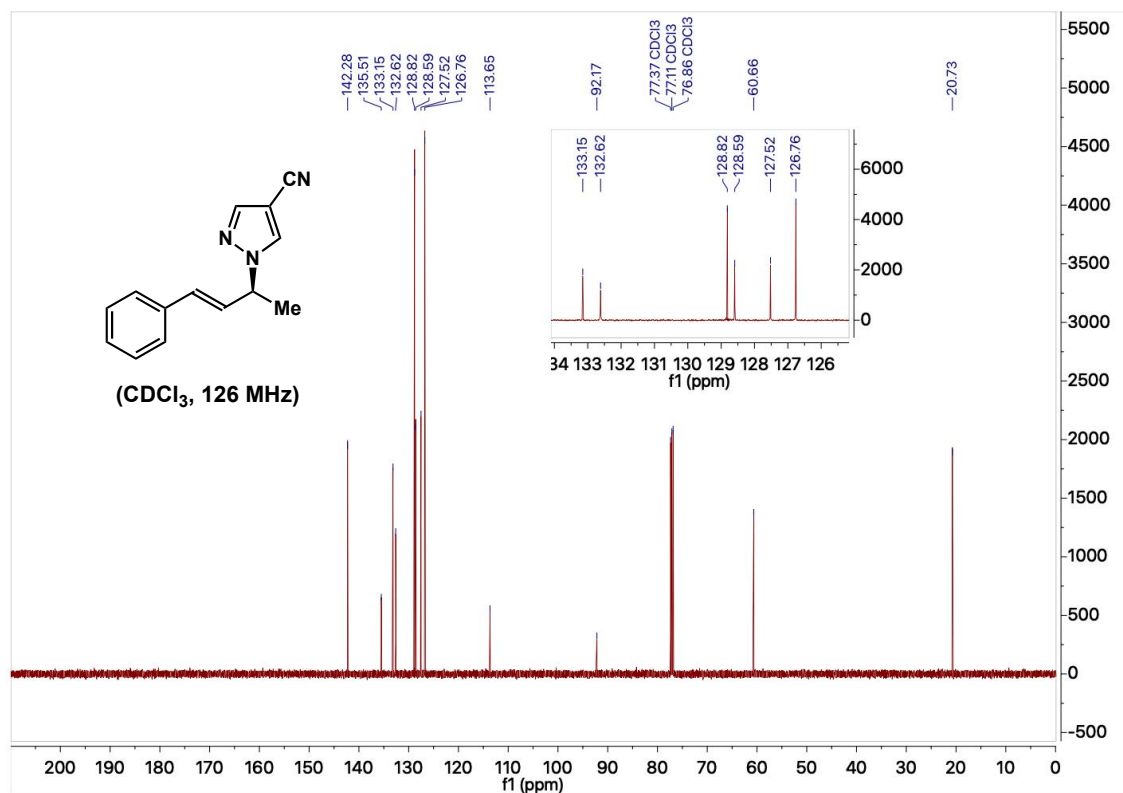

**(S, E)-3,5-dimethyl-1-(4-phenylbut-3-en-2-yl)-1H-pyrazole (3ai)**

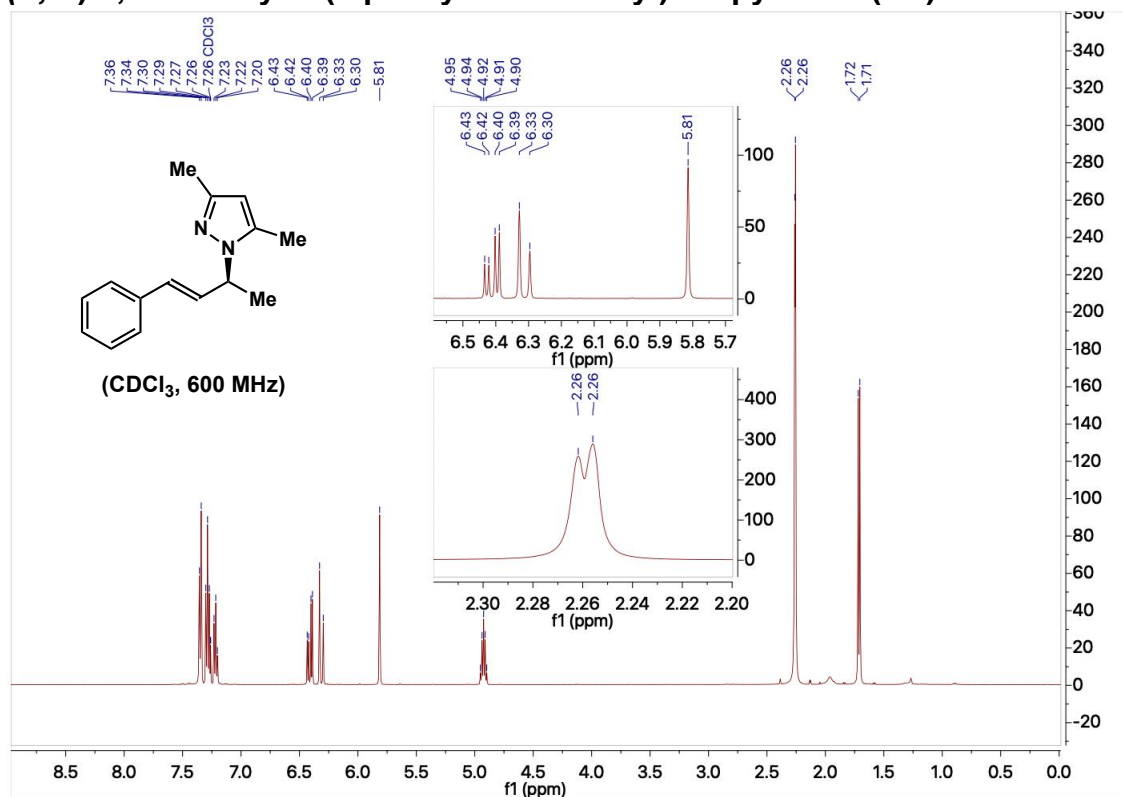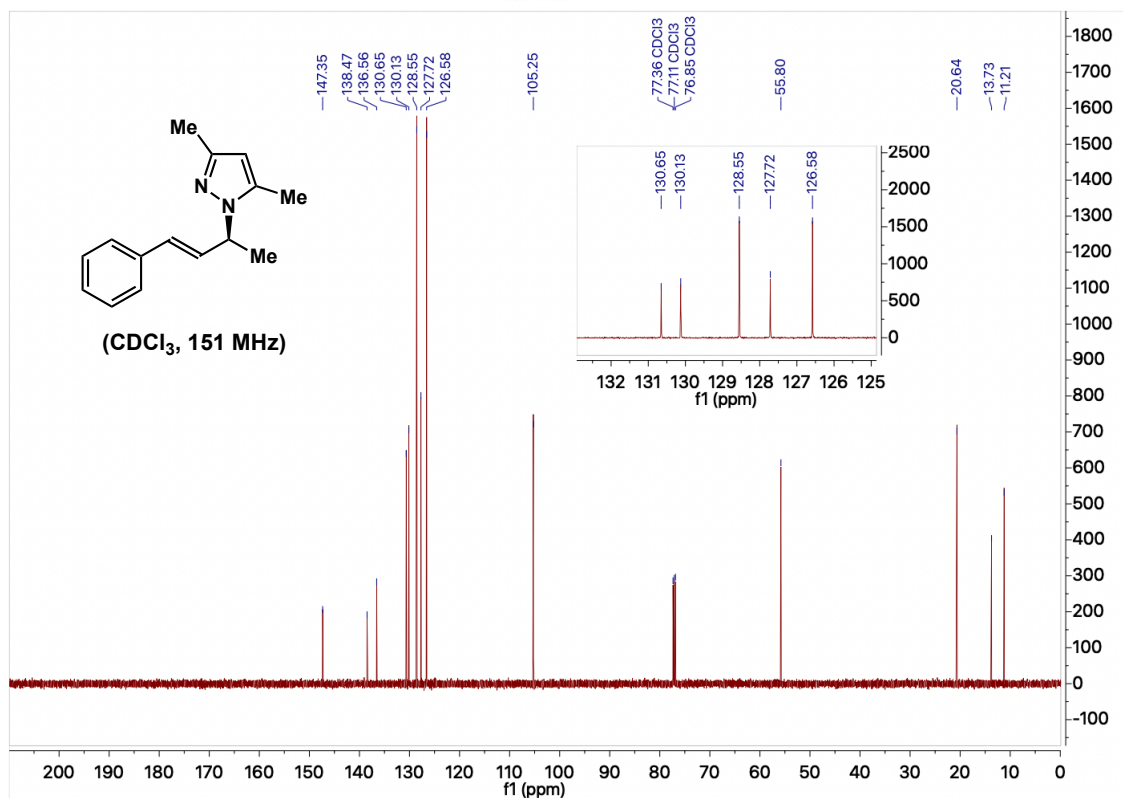



**(S, E)-4-bromo-3,5-dimethyl-1-(4-phenylbut-3-en-2-yl)-1H-pyrazole (3a)**

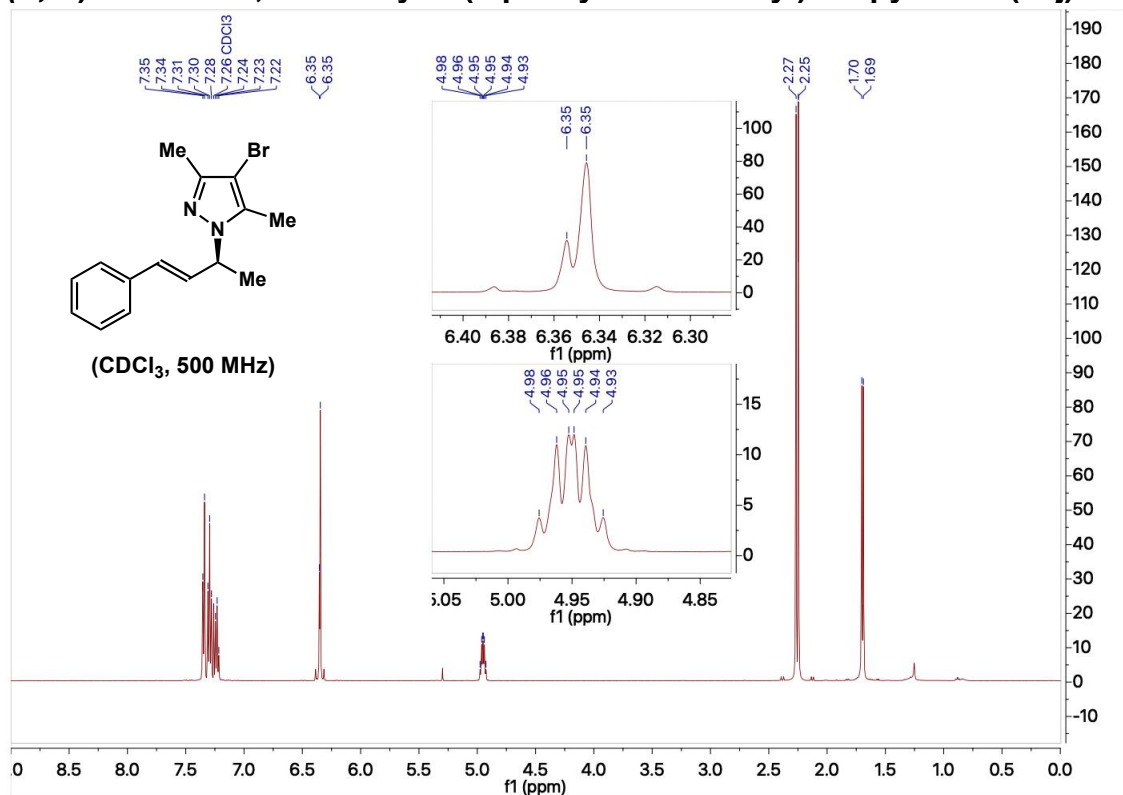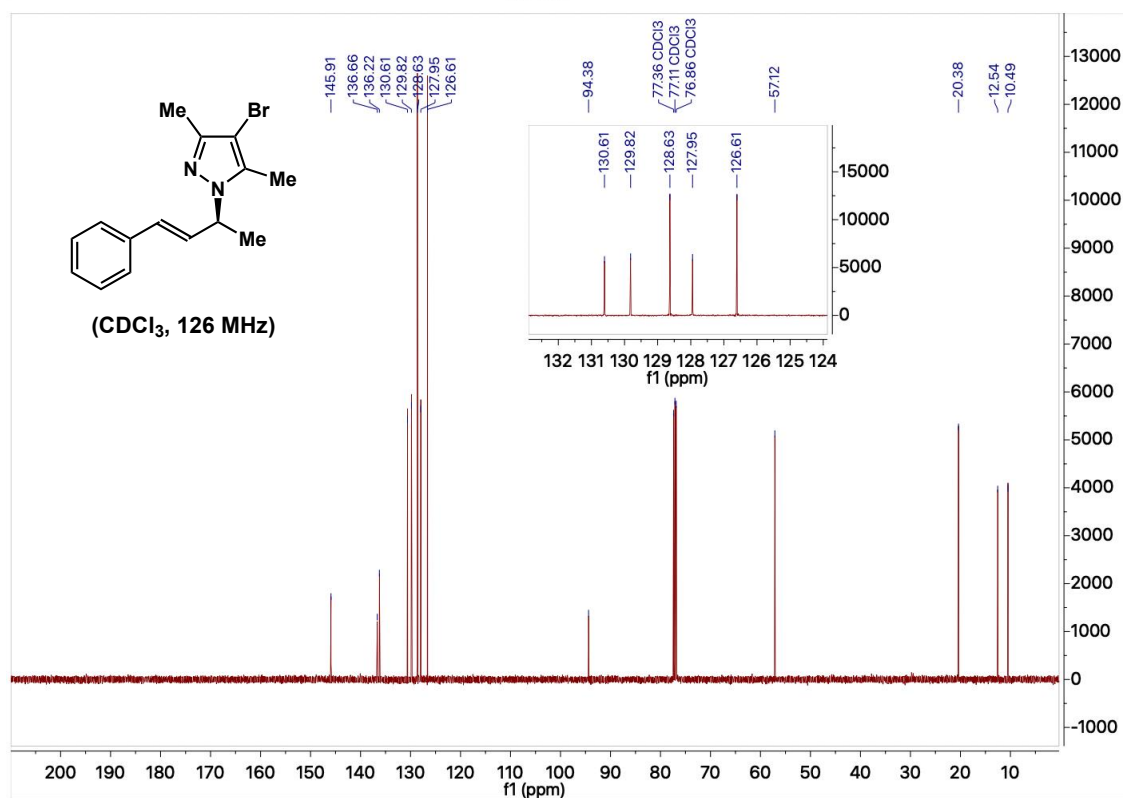

**(S, E)-3-methyl-1-(4-phenylbut-3-en-2-yl)-1H-pyrazole (3ak)**

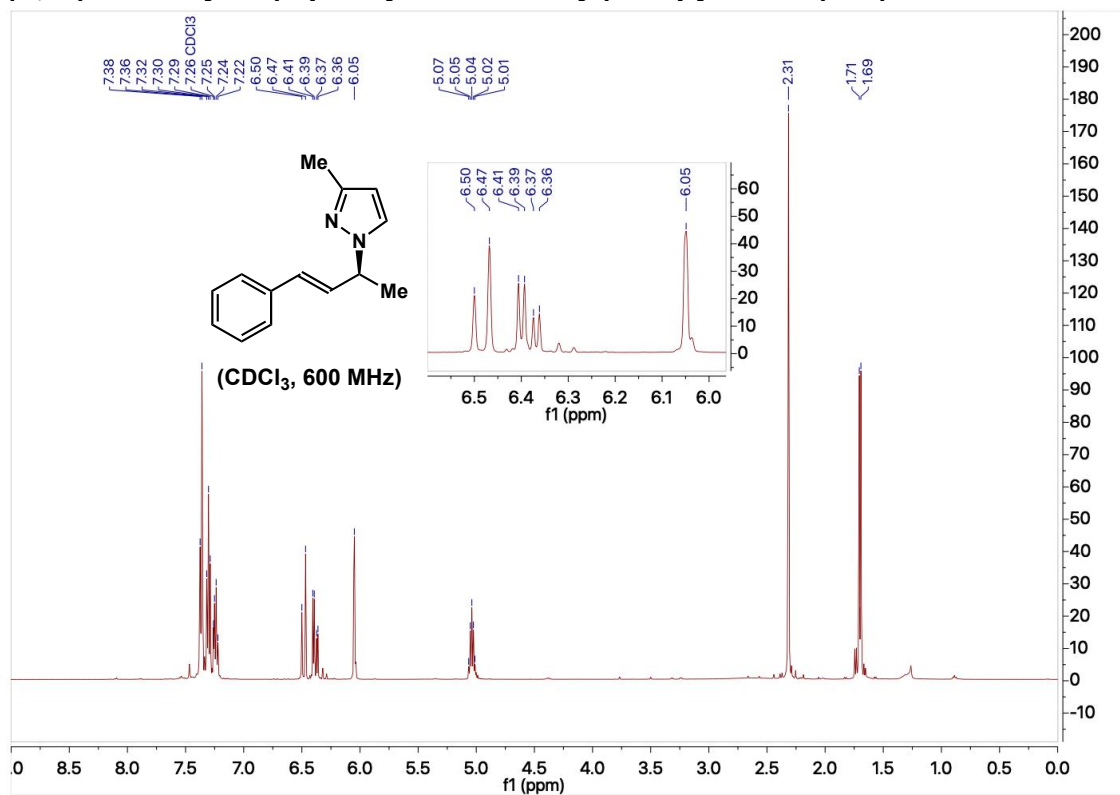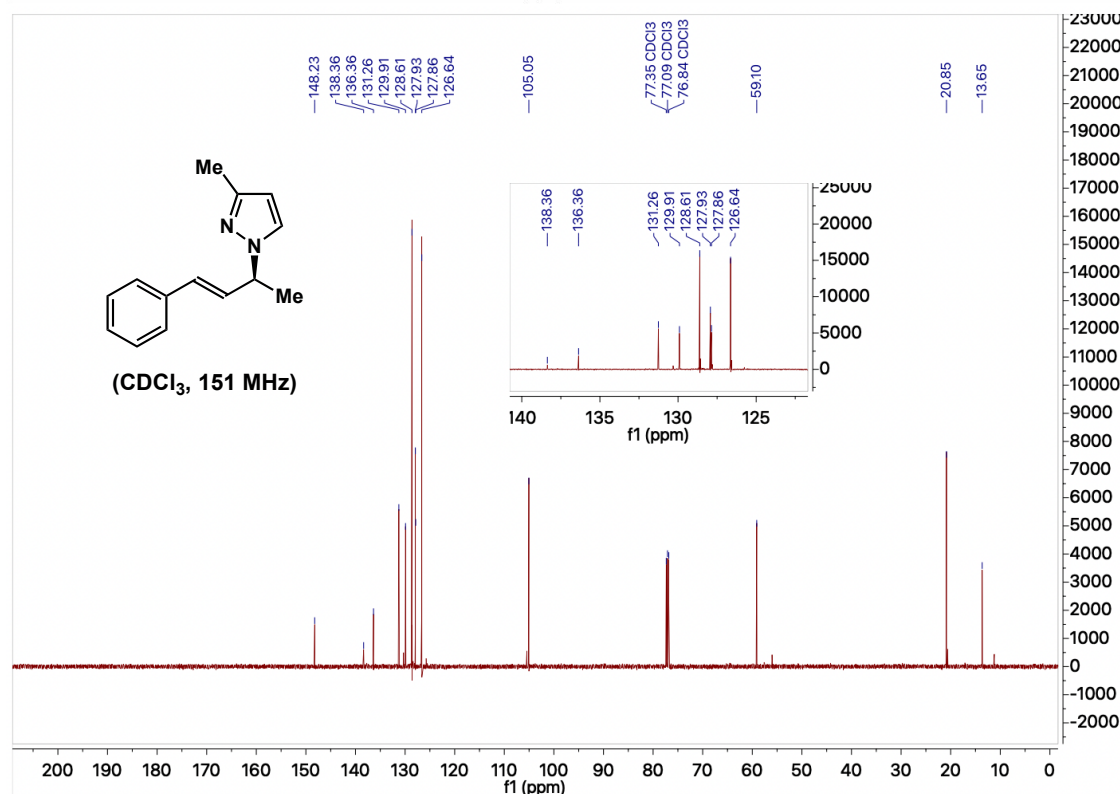



**(S, E)-3-phenyl-1-(4-phenylbut-3-en-2-yl)-1H-pyrazole (3a)**

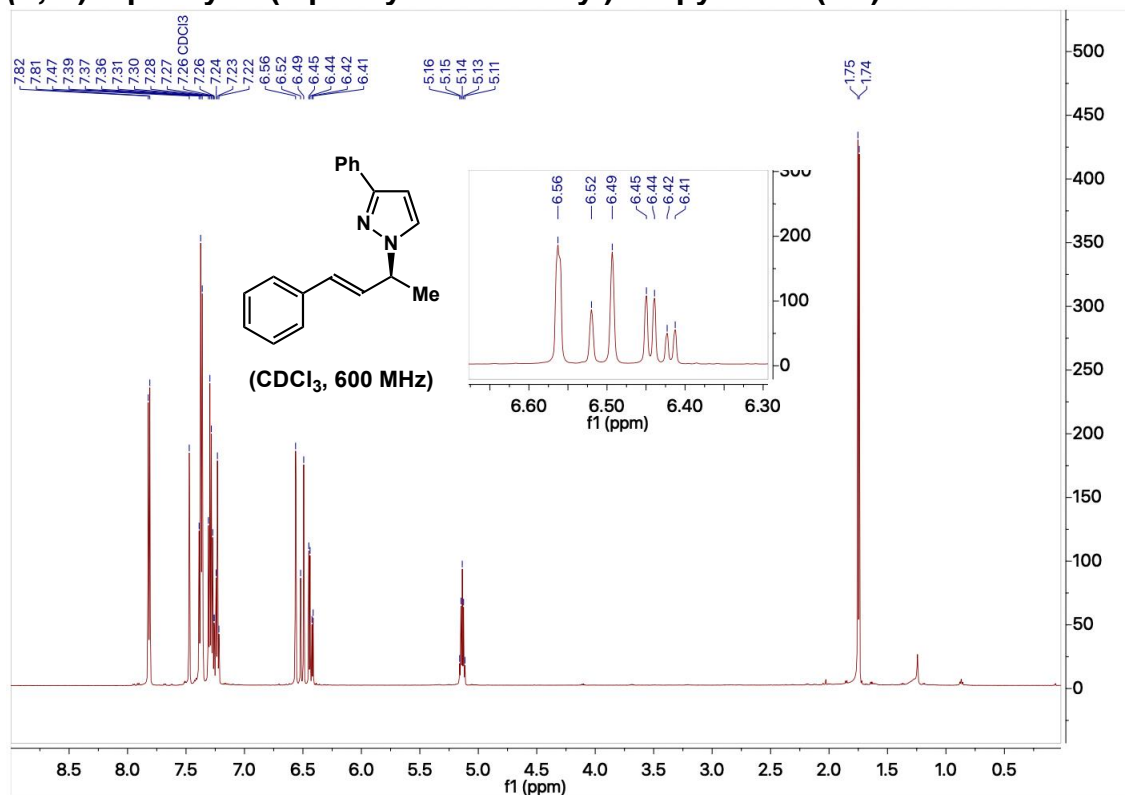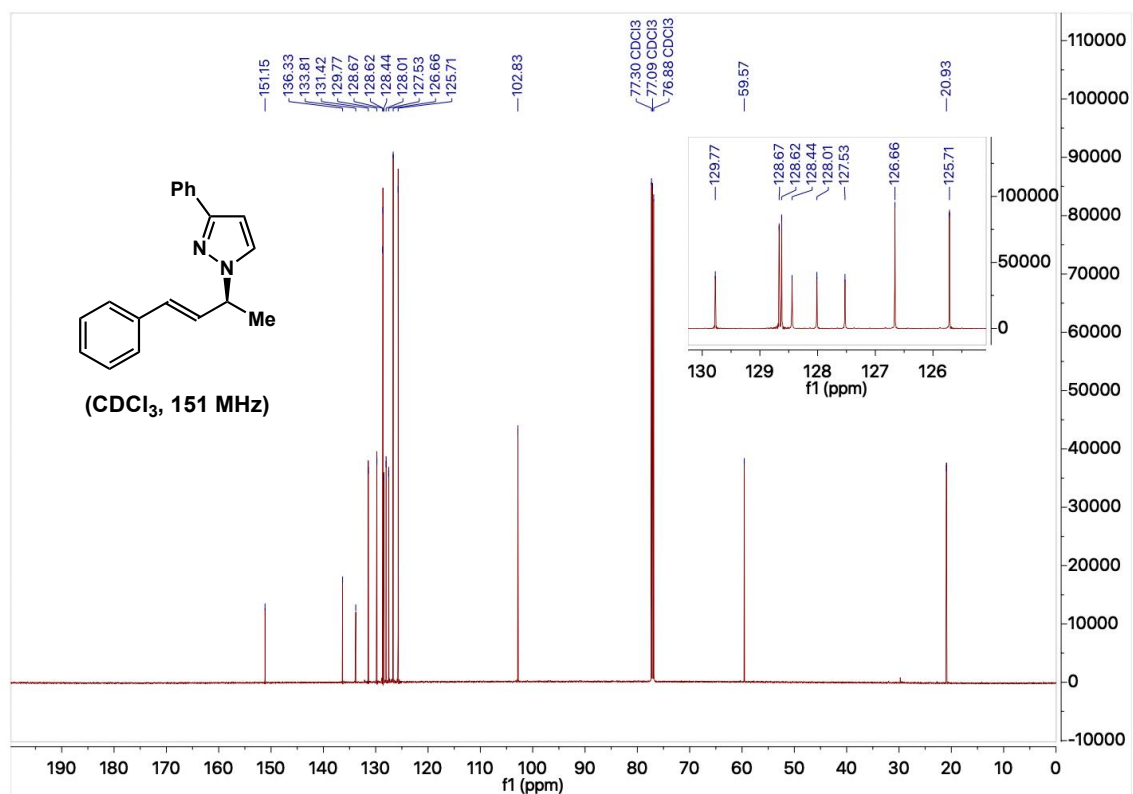

**(S, E)-4-bromo-5-methyl-1-(4-phenylbut-3-en-2-yl)-1H-pyrazole (3am)**

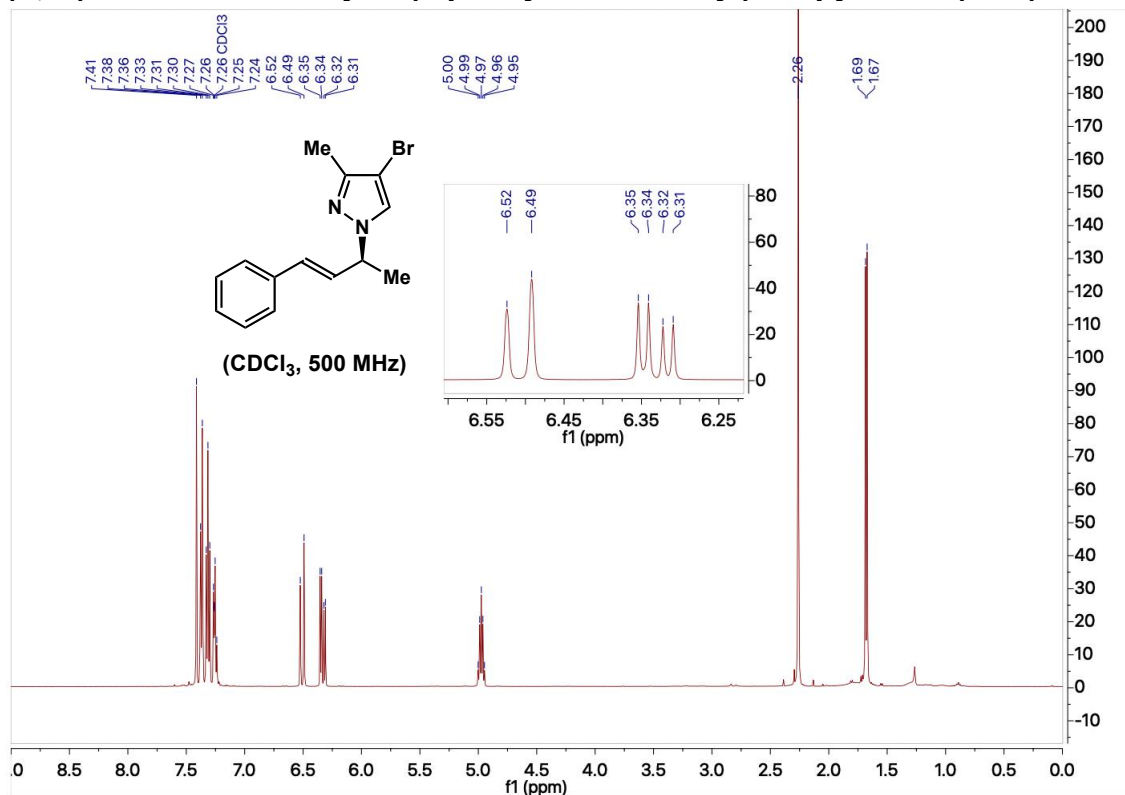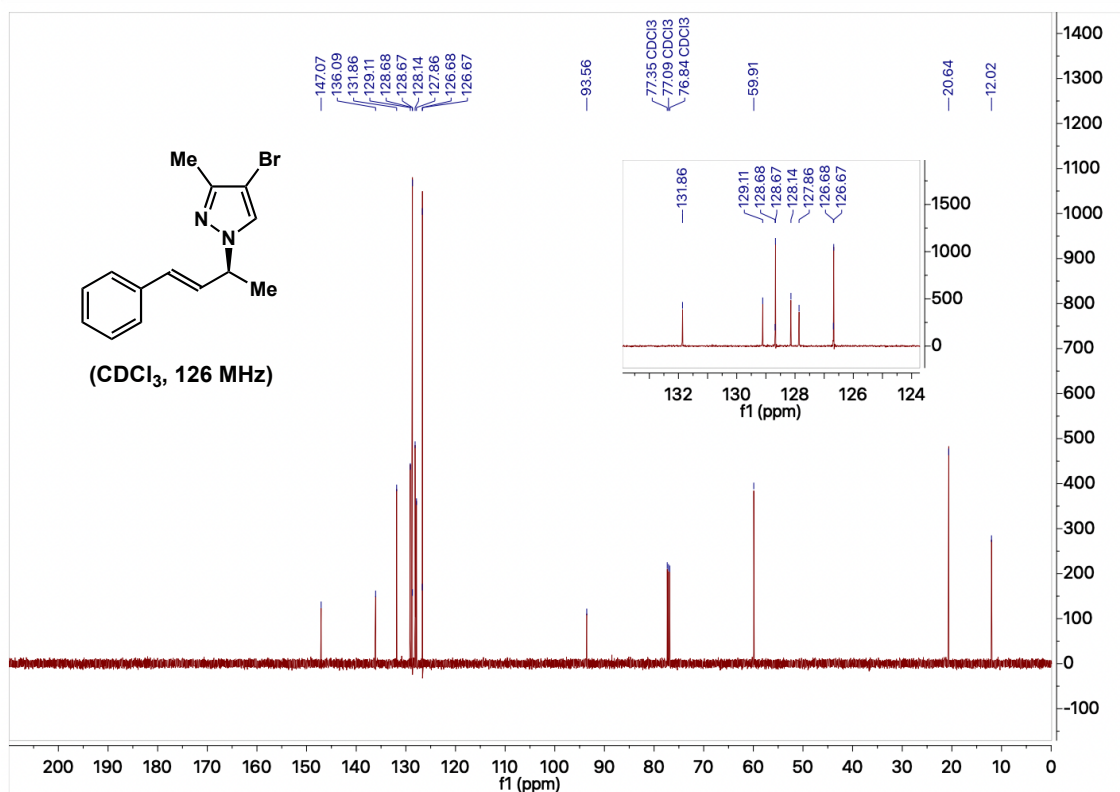

**(S, E)-2-(4-phenylbut-3-en-2-yl)-2H-1,2,3-triazole (3an)**

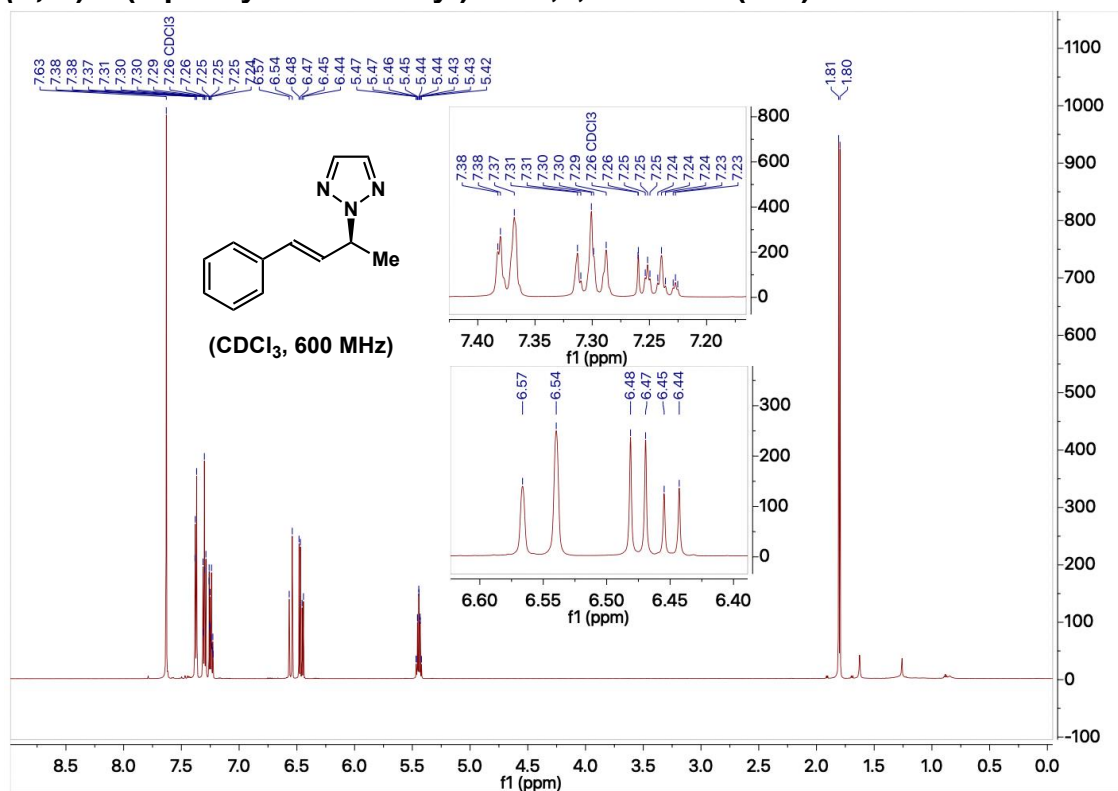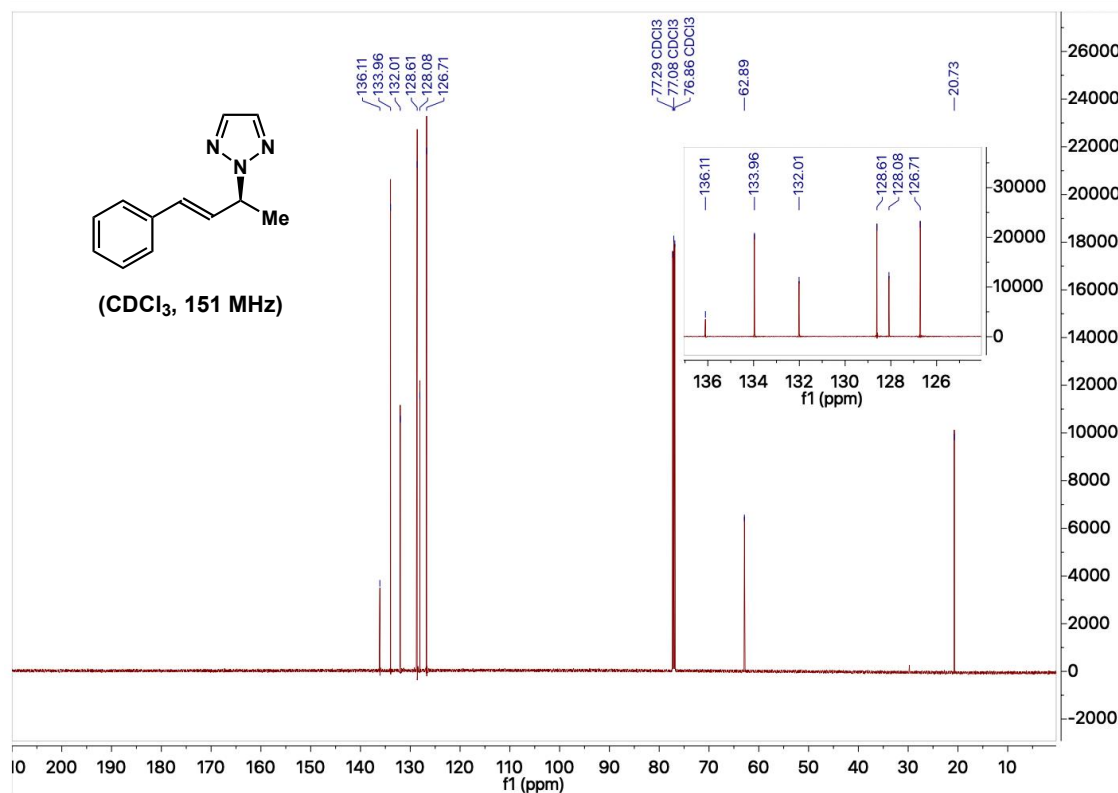

**(S, E)-2-(4-phenylbut-3-en-2-yl)-2H-benzo[d][1,2,3]triazole (3ao)**

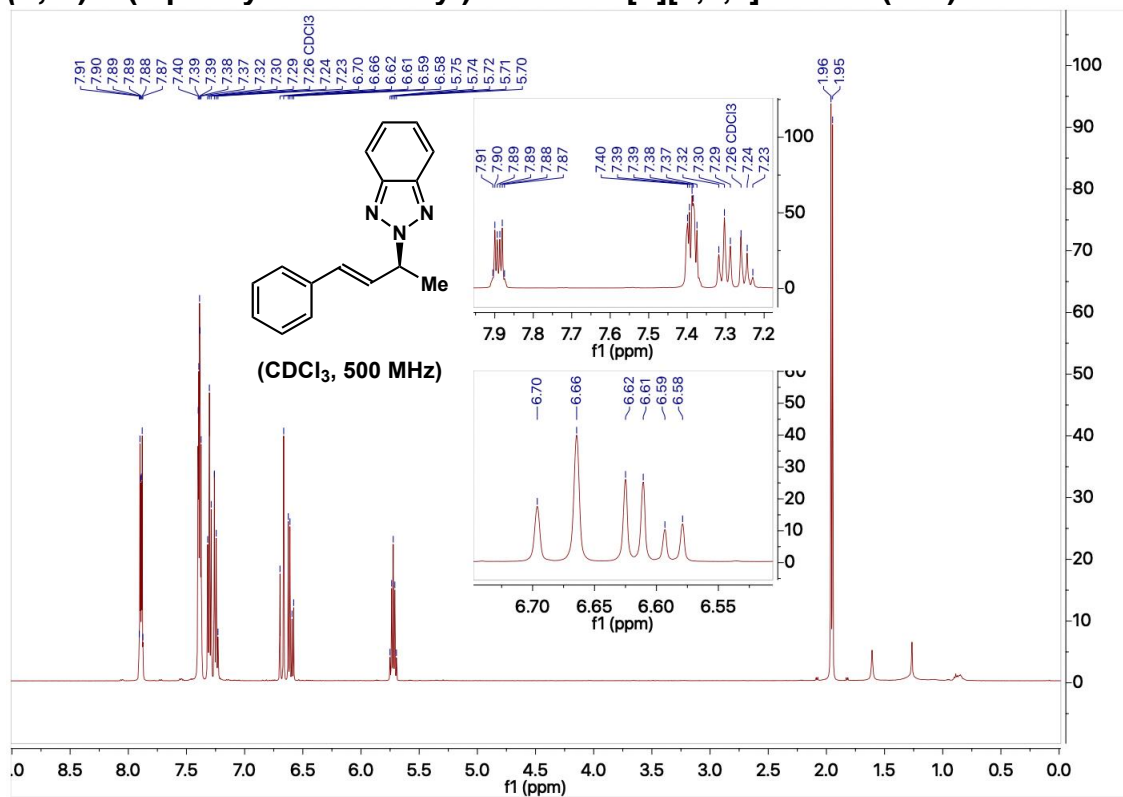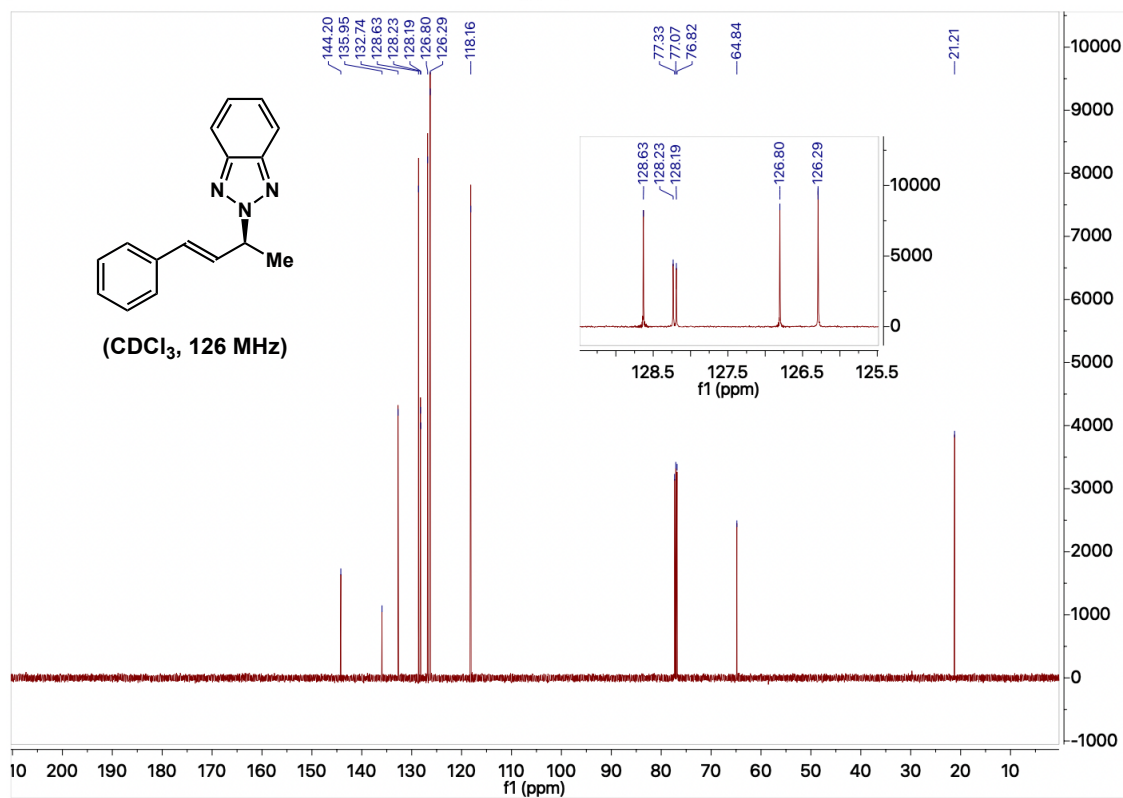

**(S, E)-2-(4-phenylbut-3-en-2-yl)-2H-indazole (3ap)**

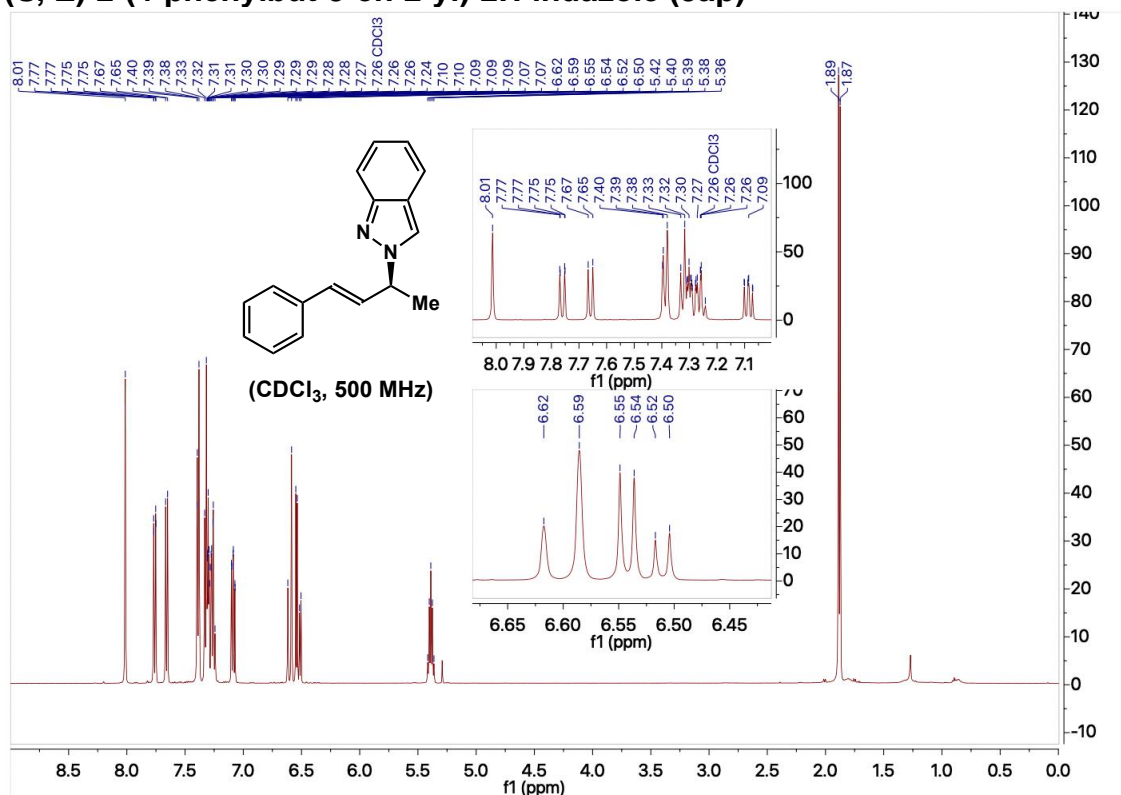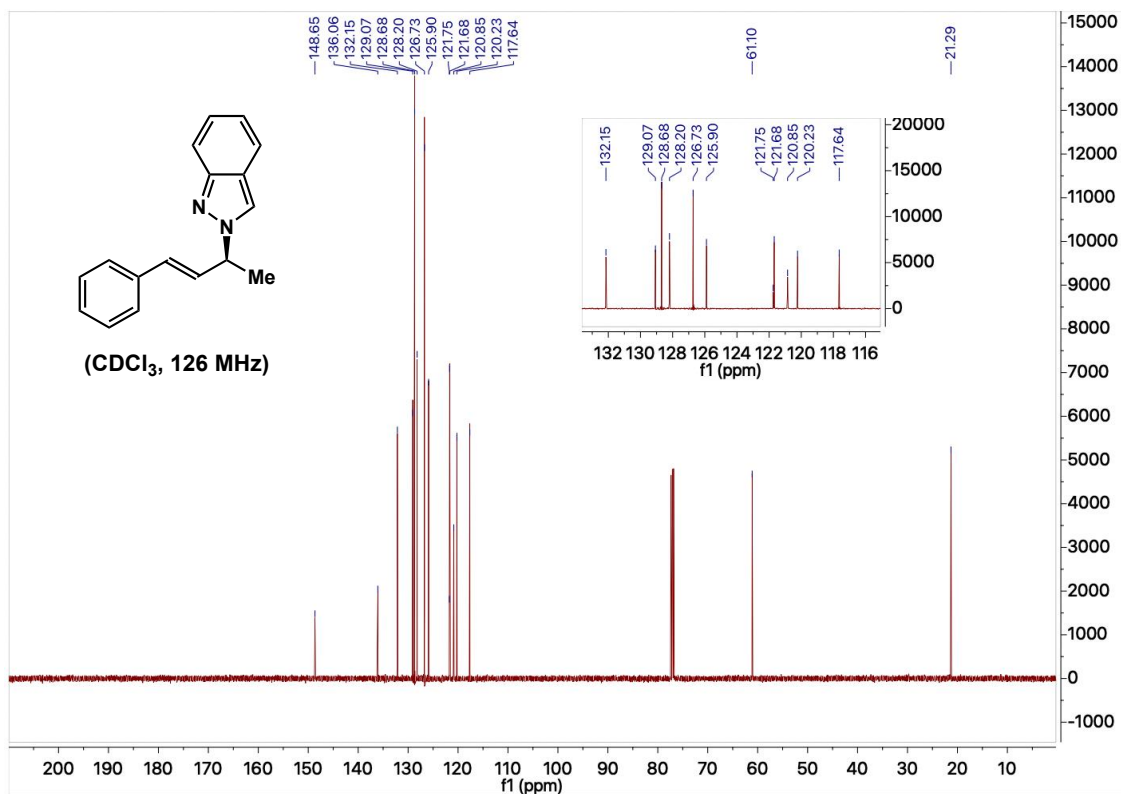

# (S, E)-2-butyl-1-(4-phenylbut-3-en-2-yl)-1H-imidazole (3aq)

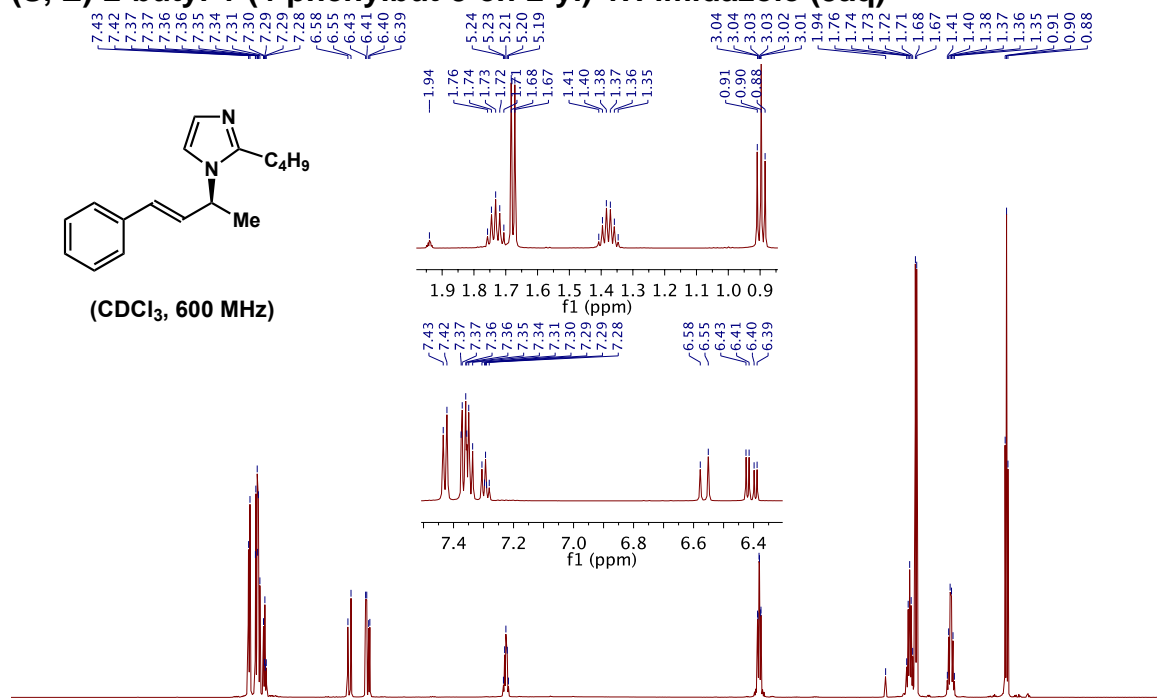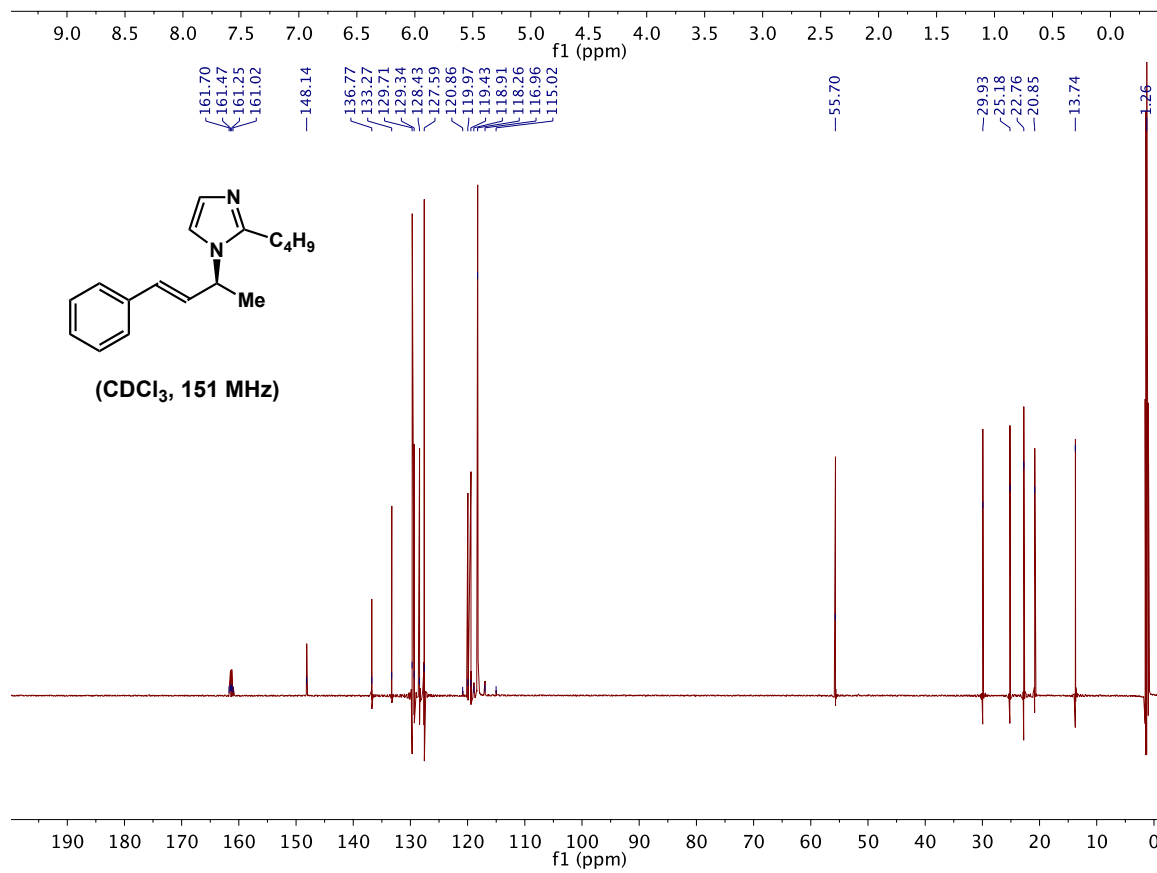

**(S, E)-1-(4-(4-methoxyphenyl)but-3-en-2-yl)-1H-pyrazole (3ba)**

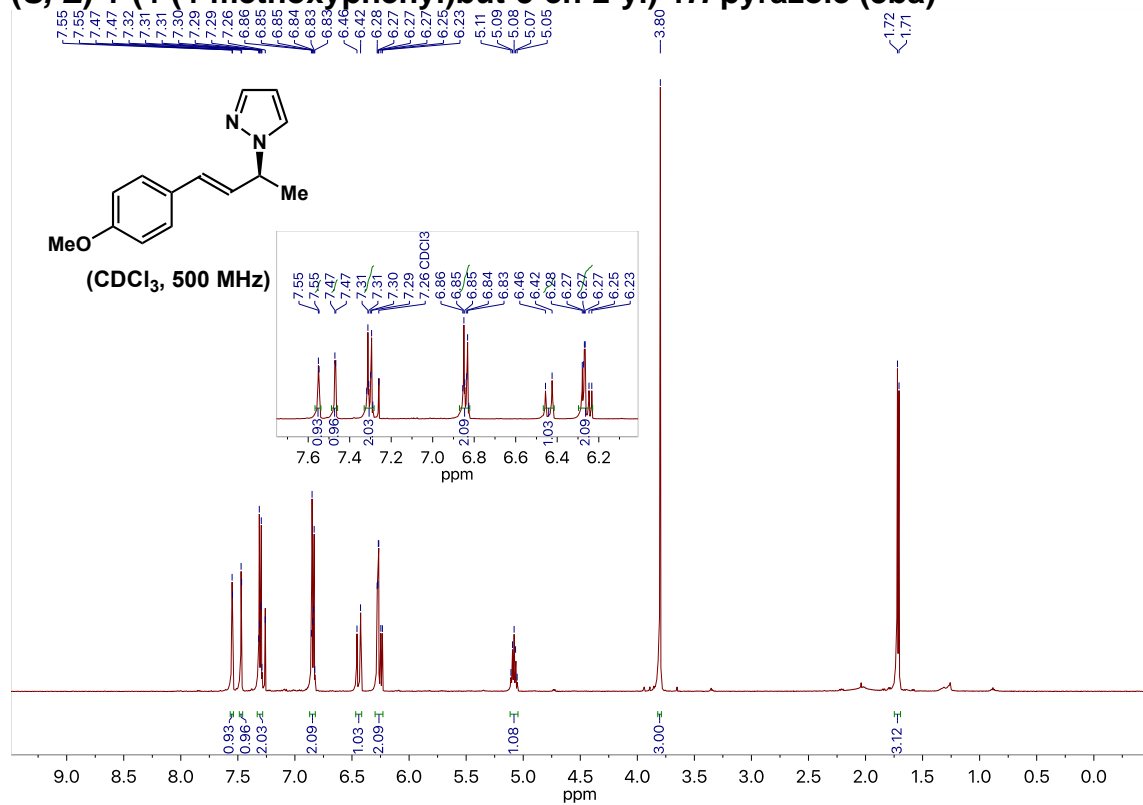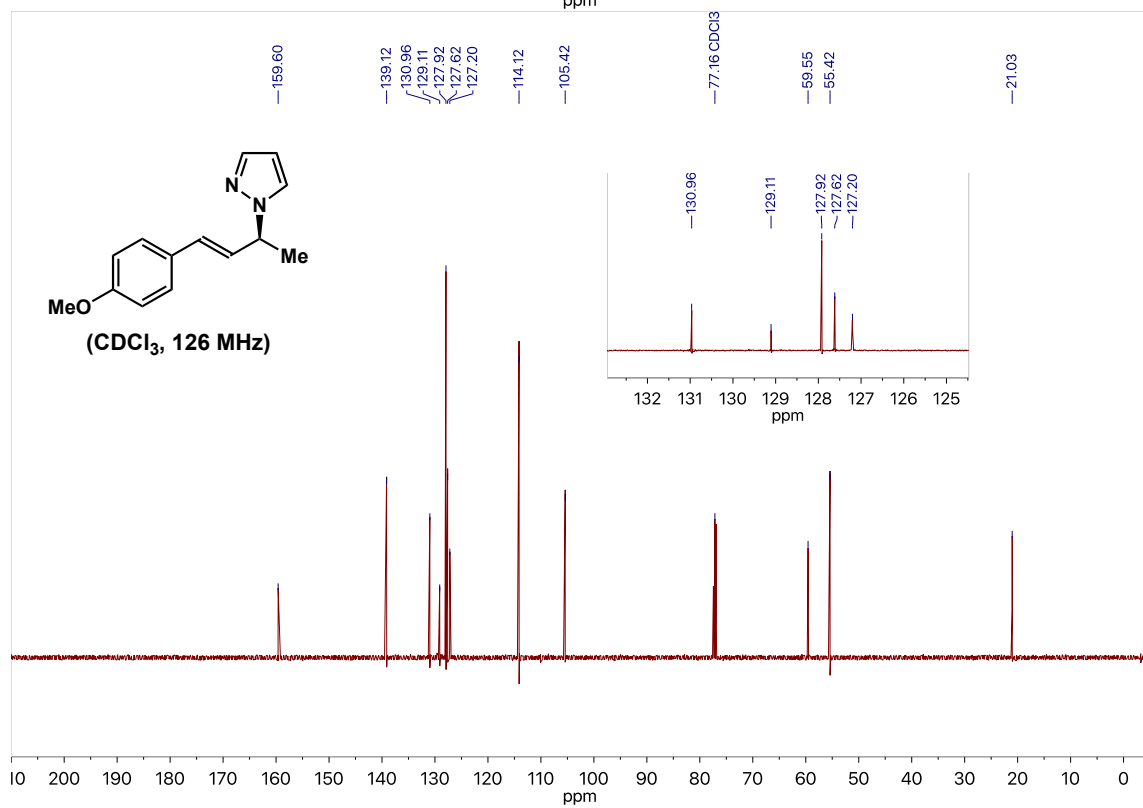

**(S, E)-1-(4-(p-tolyl)but-3-en-2-yl)-1H-pyrazole (3ca)**

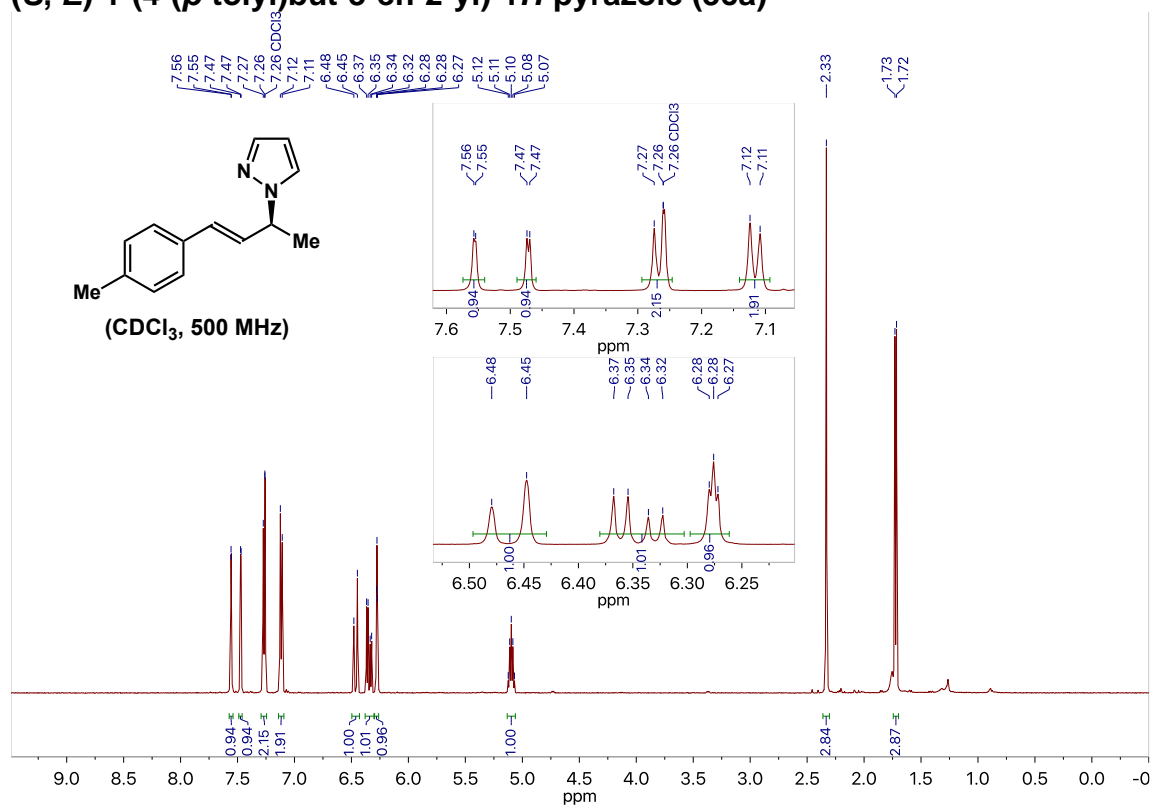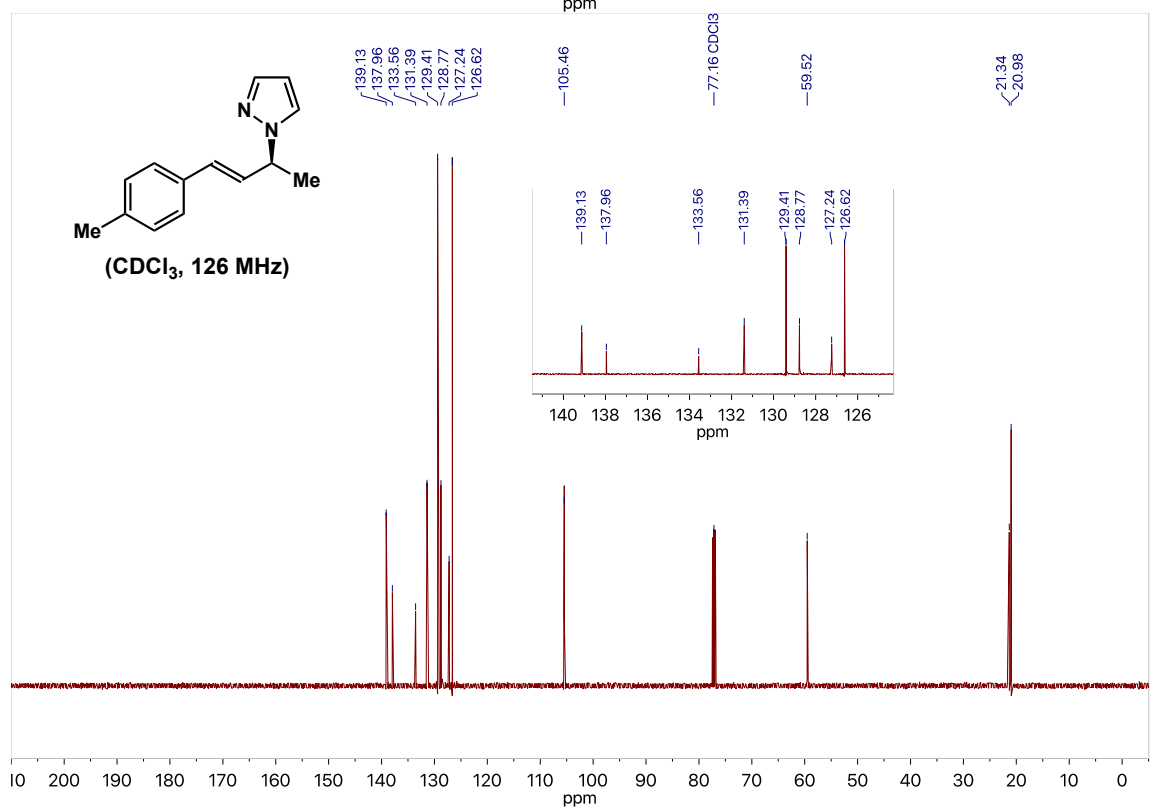



**(S, E)-1-(4-(4-chlorophenyl)but-3-en-2-yl)-1H-pyrazole (3da)**

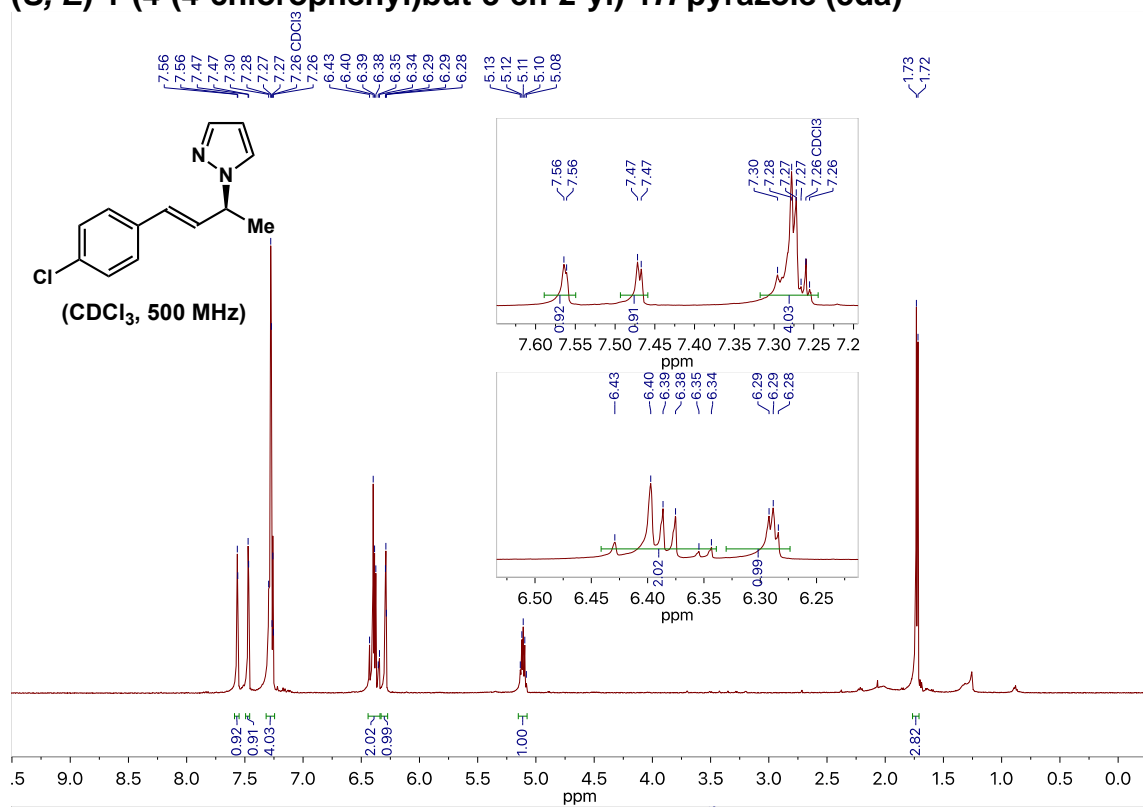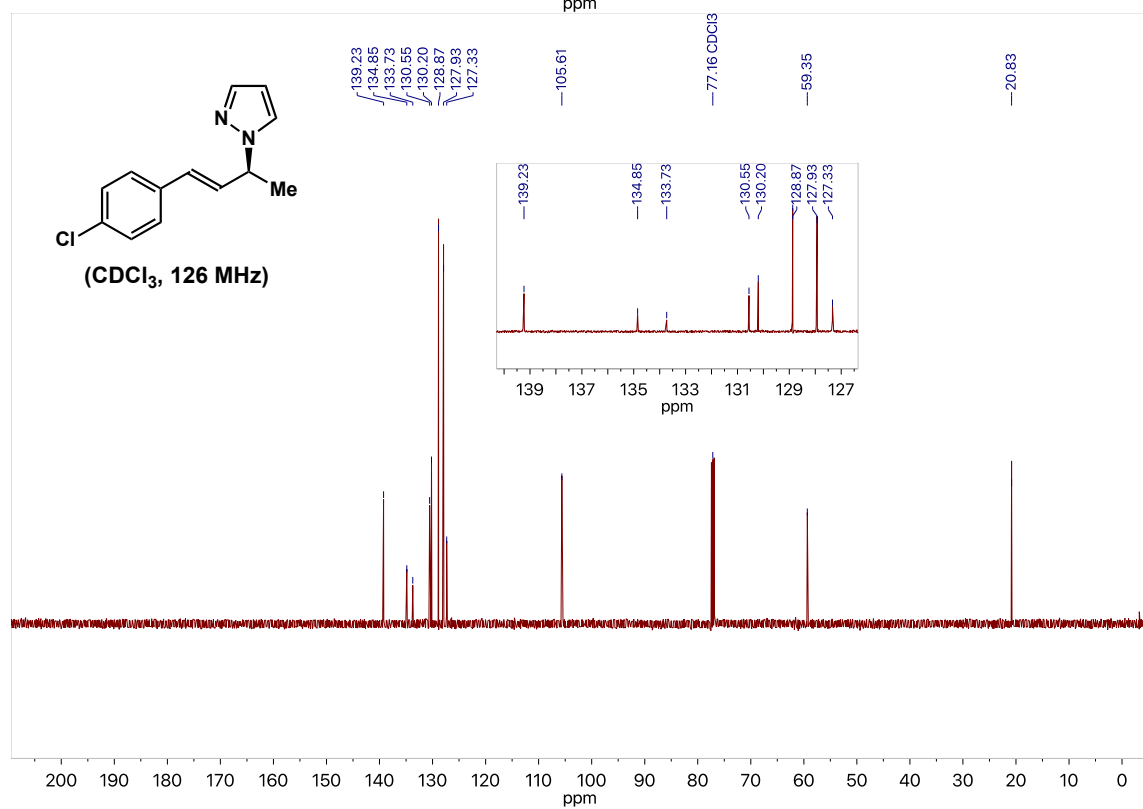

**(S, E)-1-(4-(4-fluorophenyl)but-3-en-2-yl)-1H-pyrazole (3ea)**

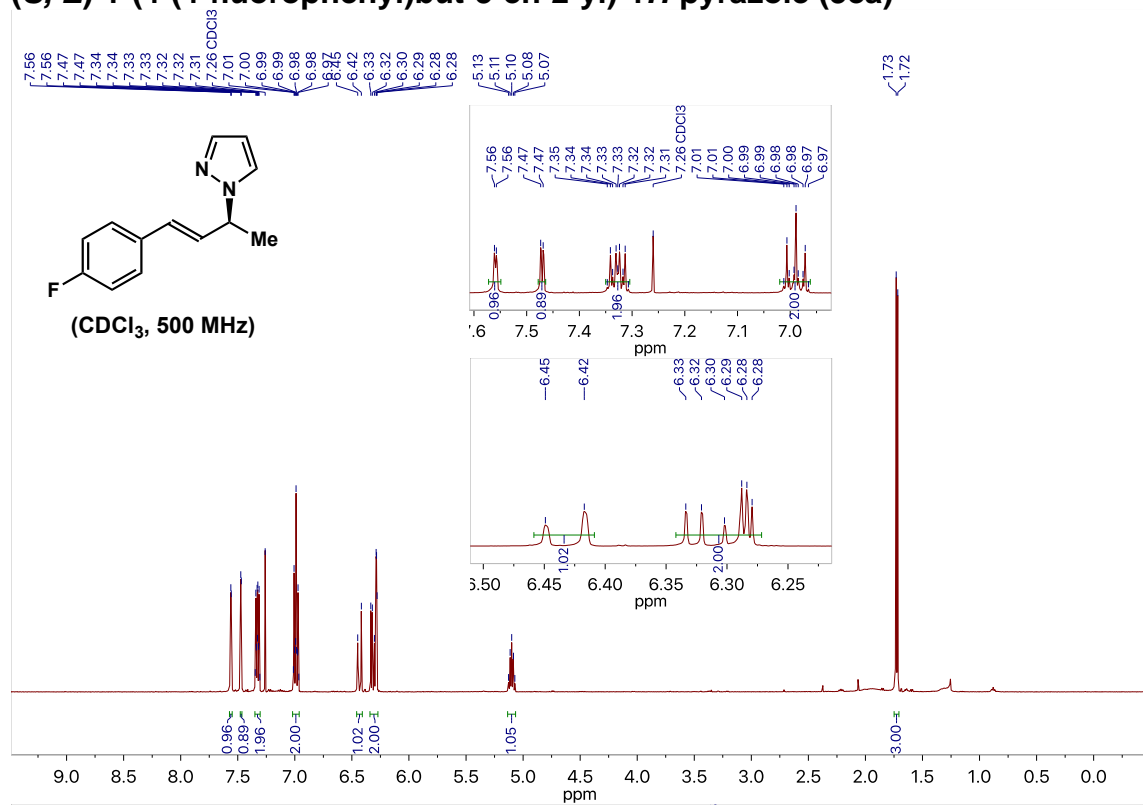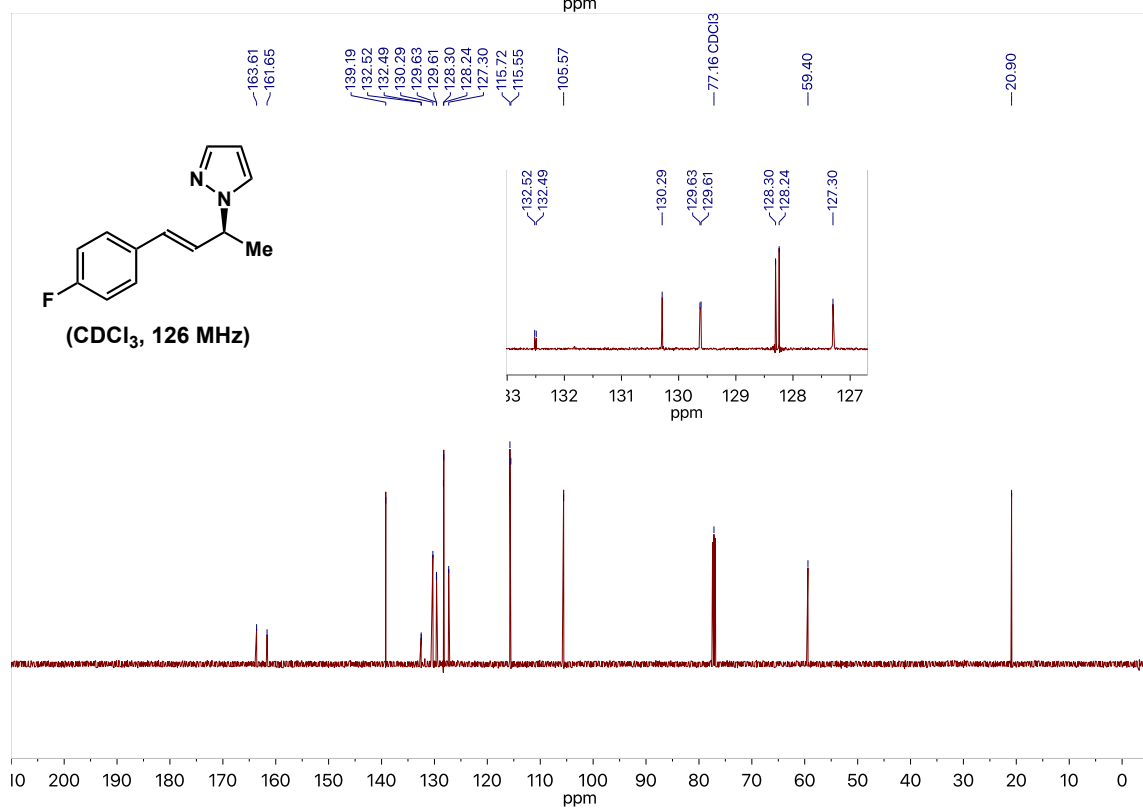

**(S, E)-1-(4-(3-methoxyphenyl)but-3-en-2-yl)-1H-pyrazole (3fa)**

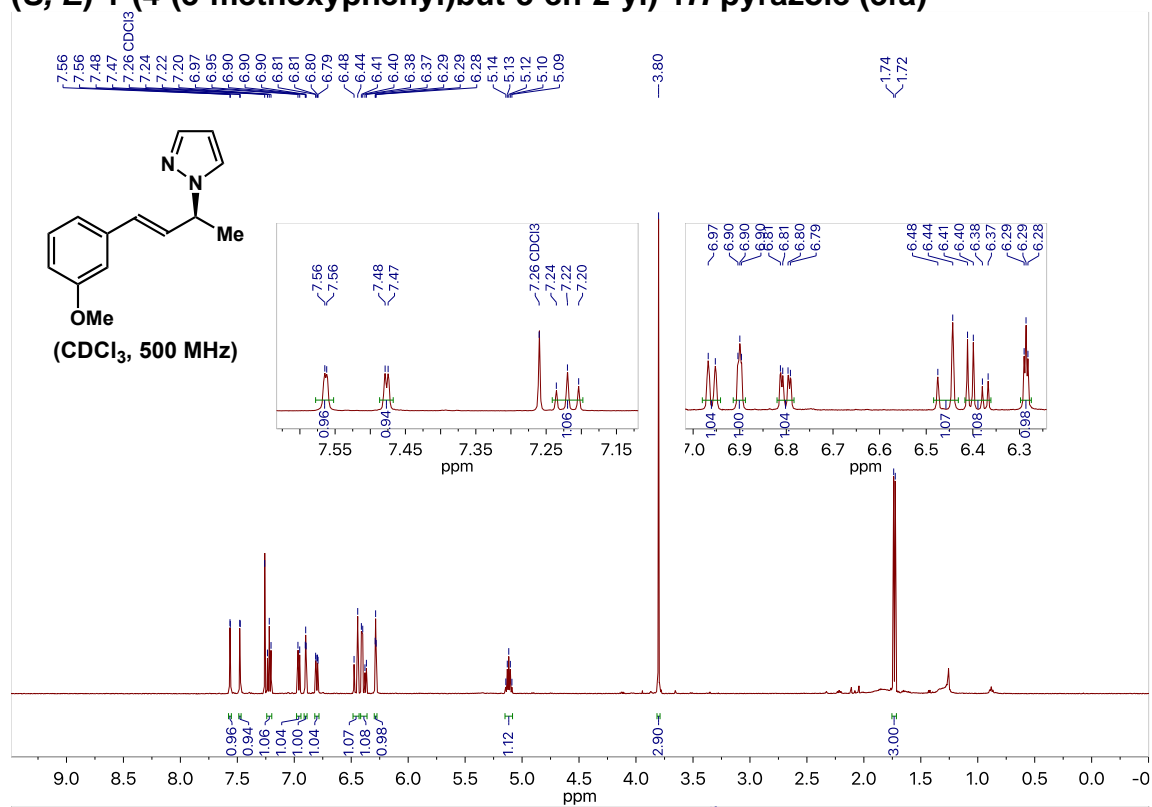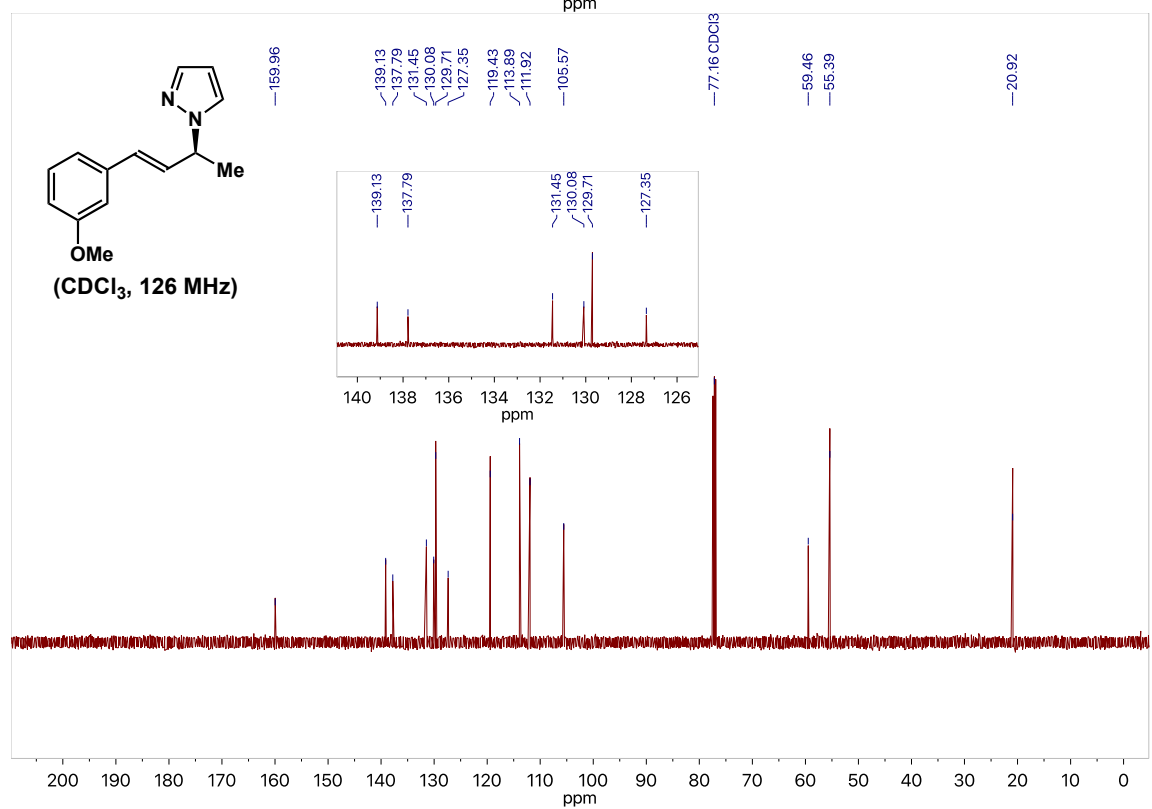

**(S, E)-1-(4-(*m*-tolyl)but-3-en-2-yl)-1*H*-pyrazole (3ga)**

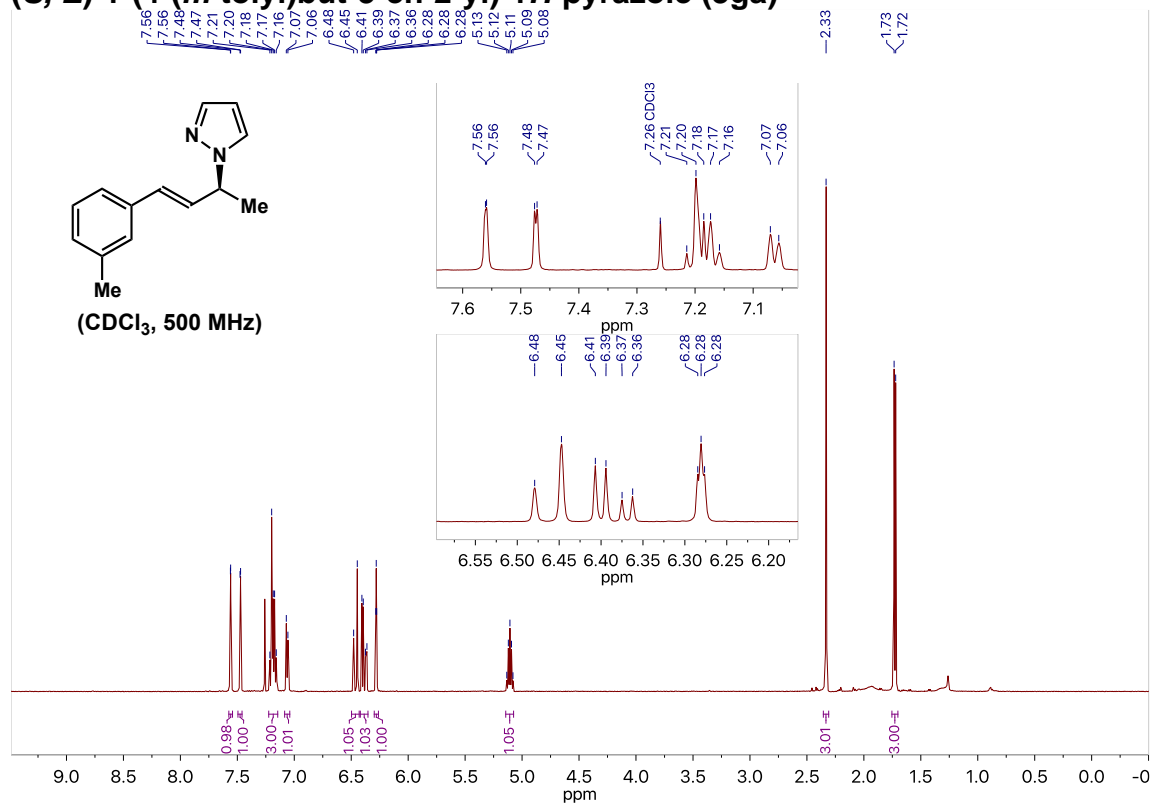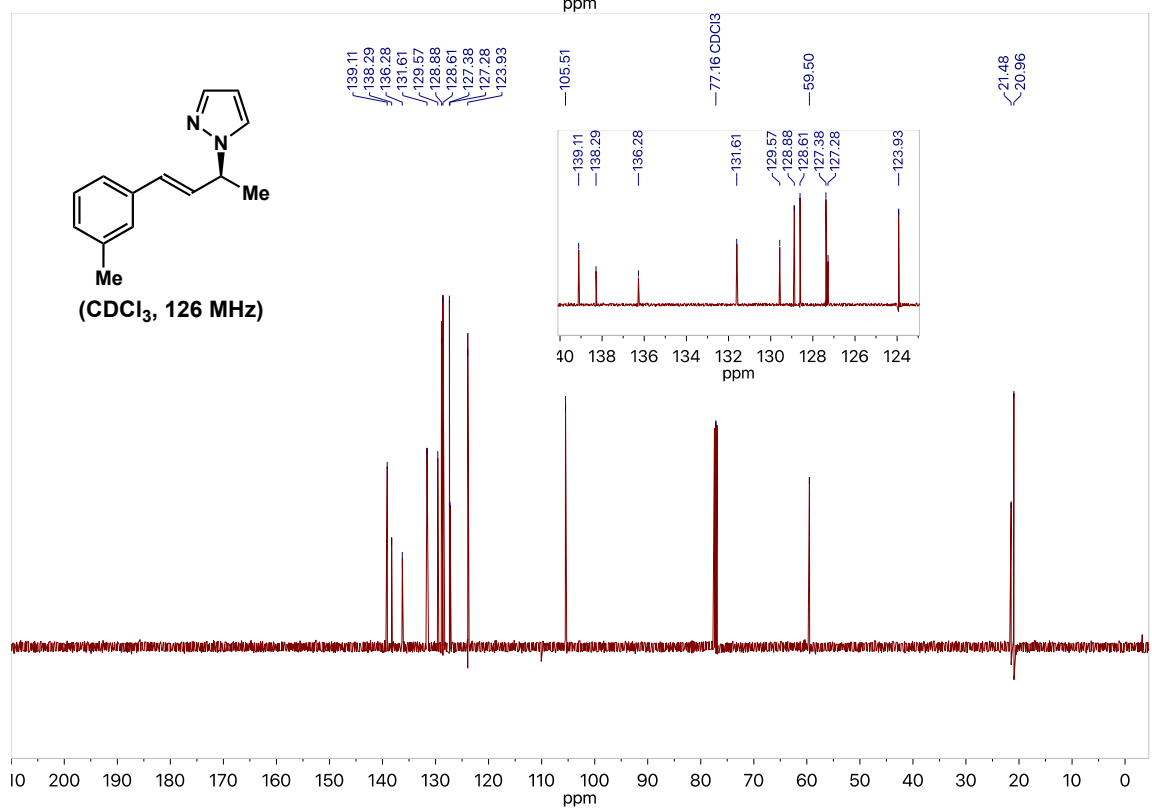

**(S, E)-1-(4-(2-methoxyphenyl)but-3-en-2-yl)-1H-pyrazole (3ha)**

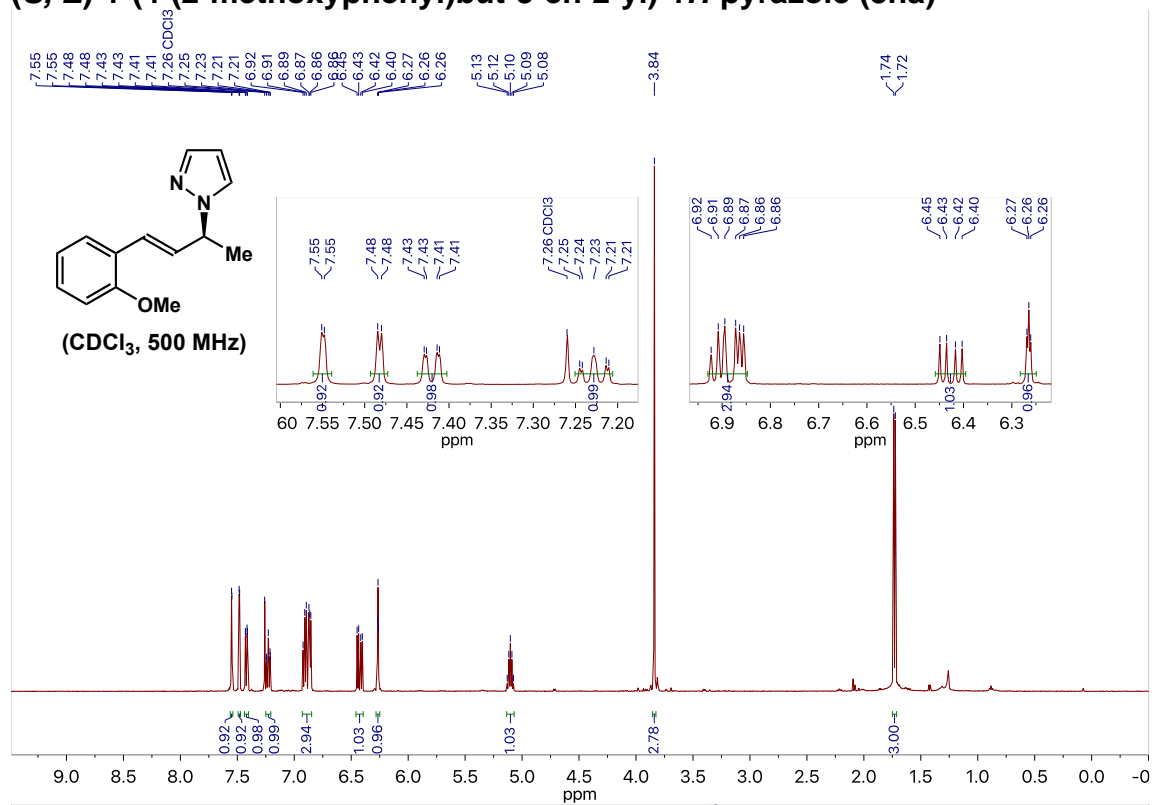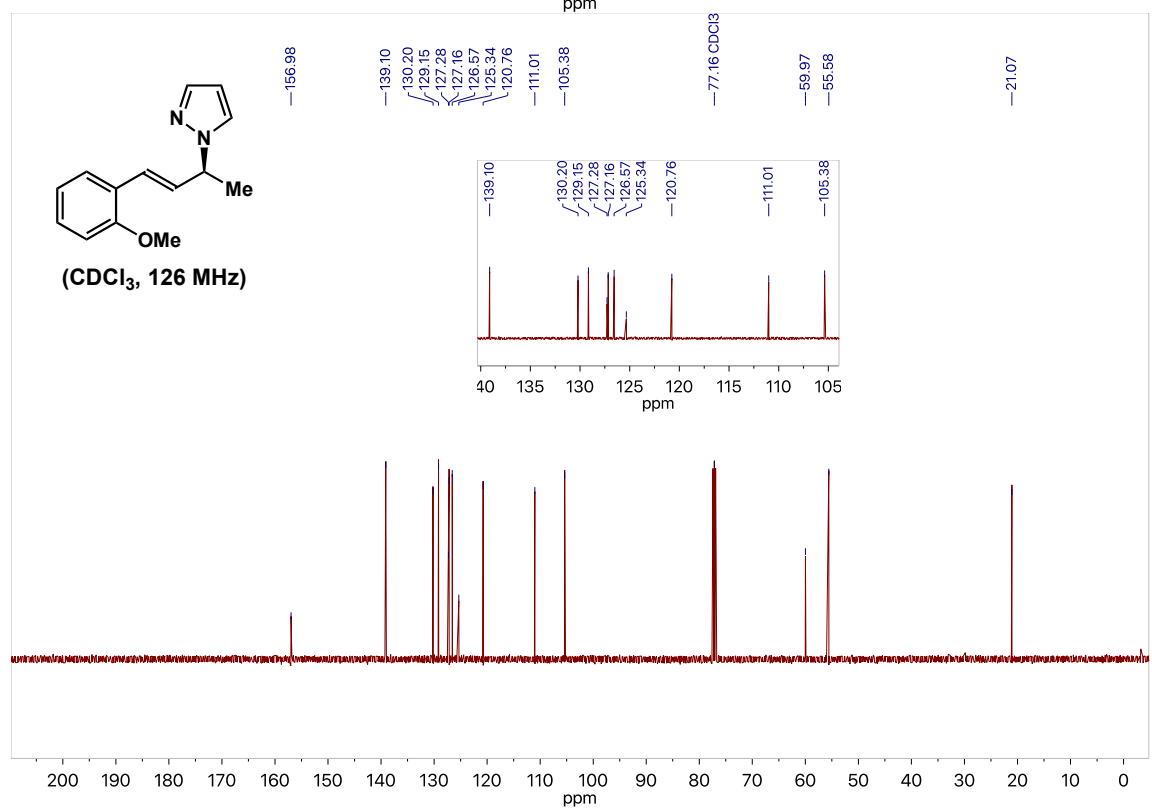

**(S, E)-1-(4-(o-tolyl)but-3-en-2-yl)-1H-pyrazole (3ia)**

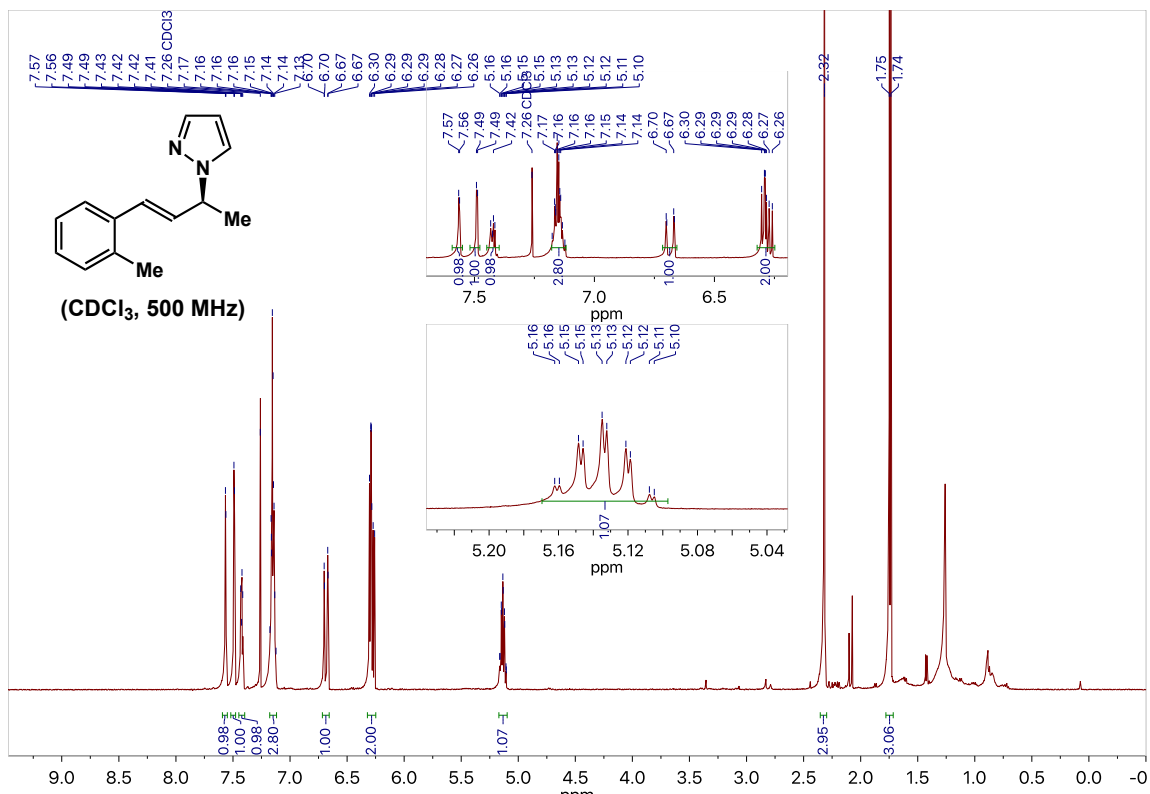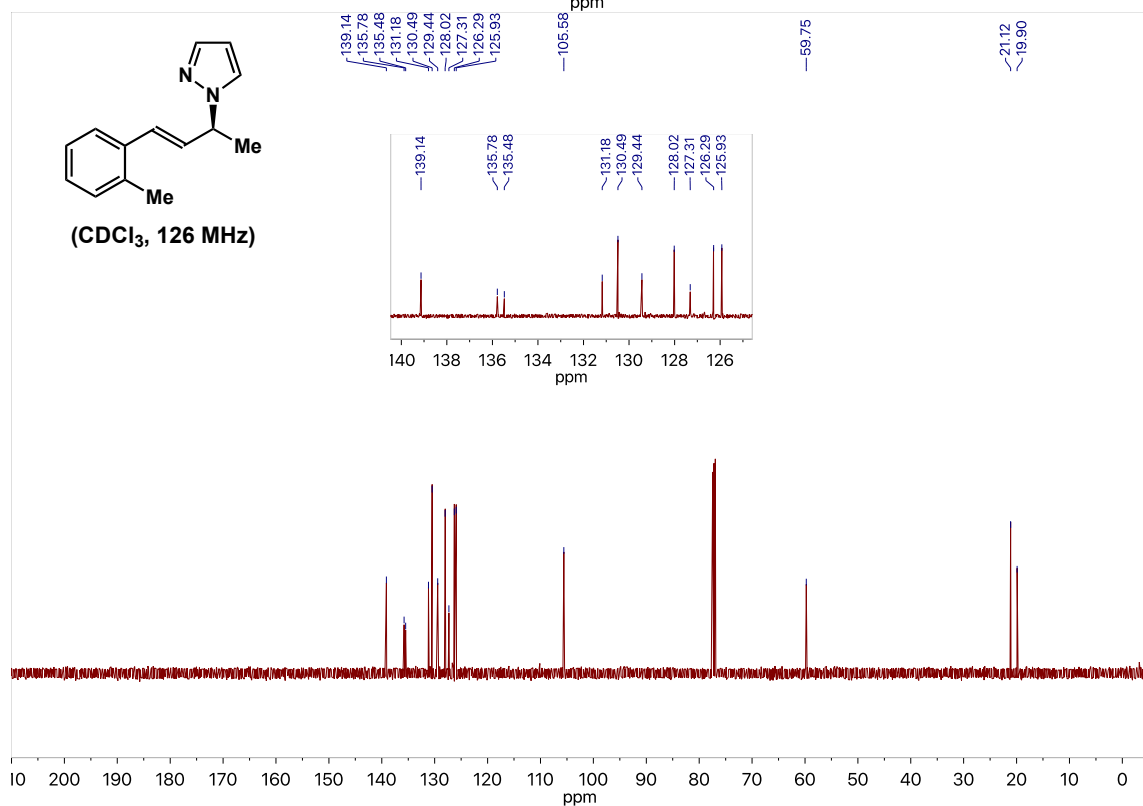

**(S, E)-1-(4-(furan-2-yl)but-3-en-2-yl)-1H-pyrazole (3ja)**

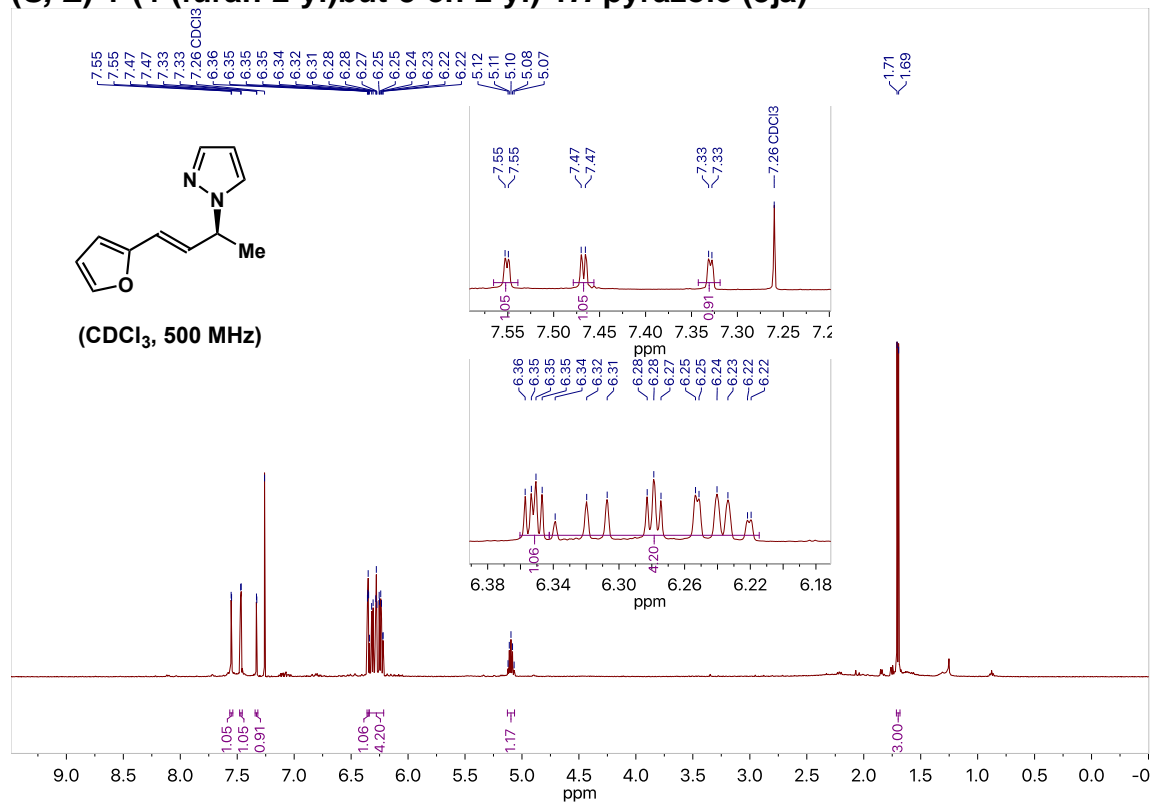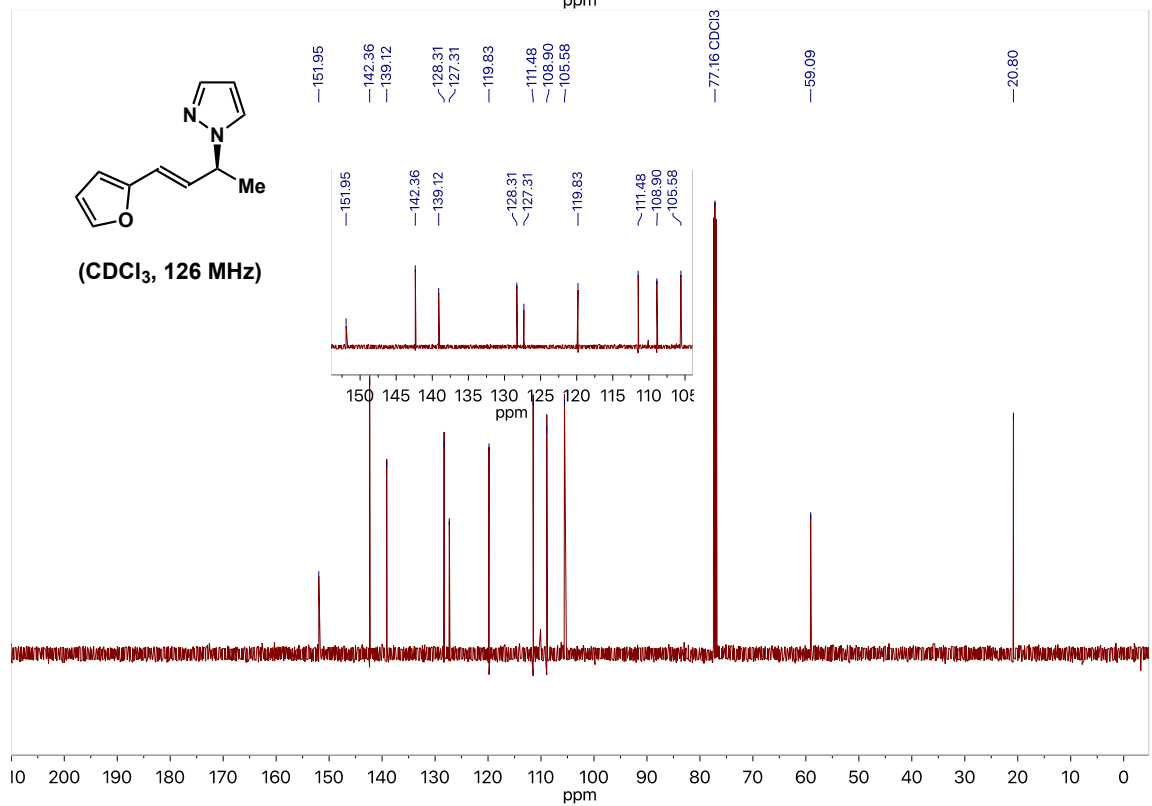

**(S, E)-1-(4-(thiophen-2-yl)but-3-en-2-yl)-1H-pyrazole (3ka)**

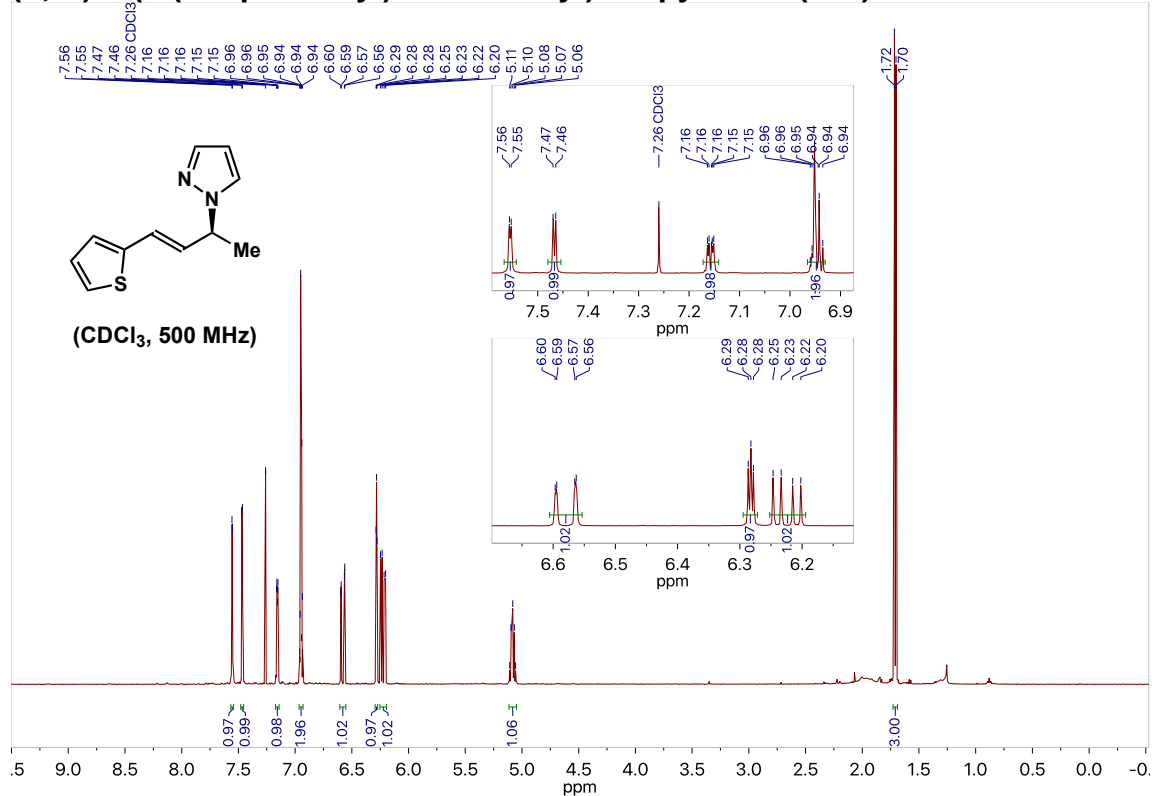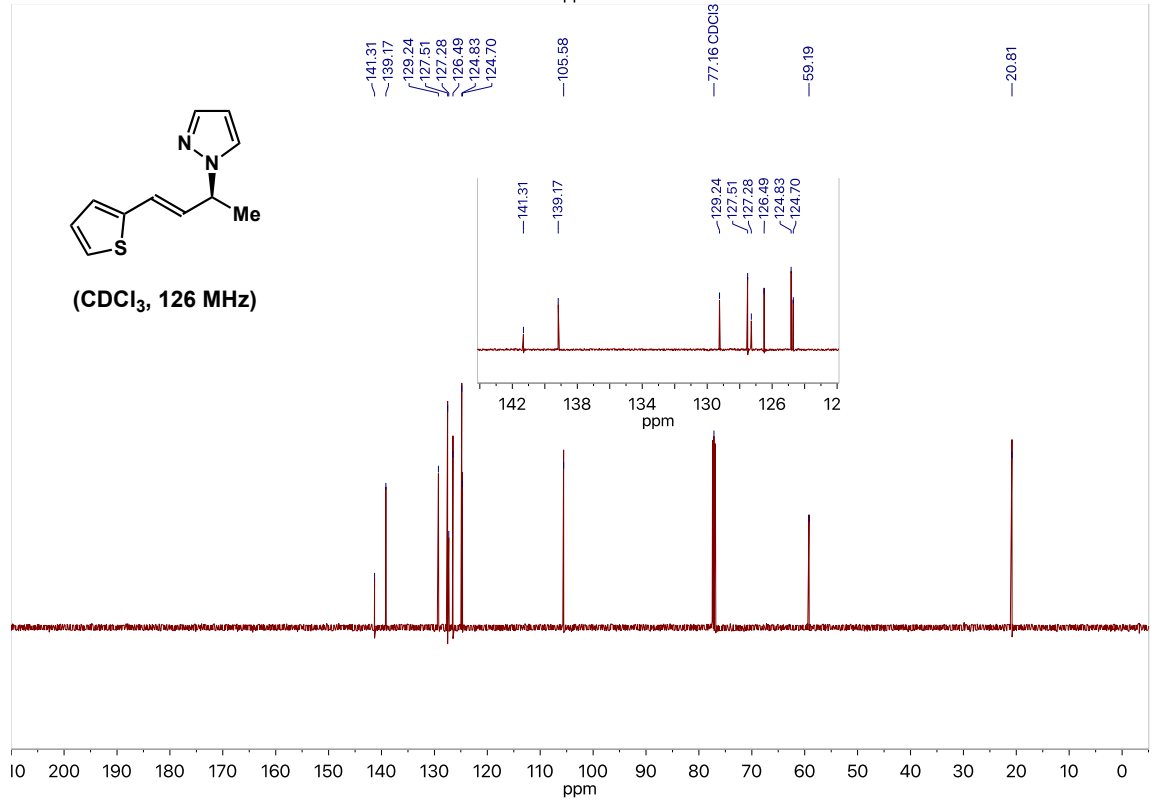



**(S, E)-1-(4-cyclohexylbut-3-en-2-yl)-3-phenyl-1H-pyrazole (3la)**

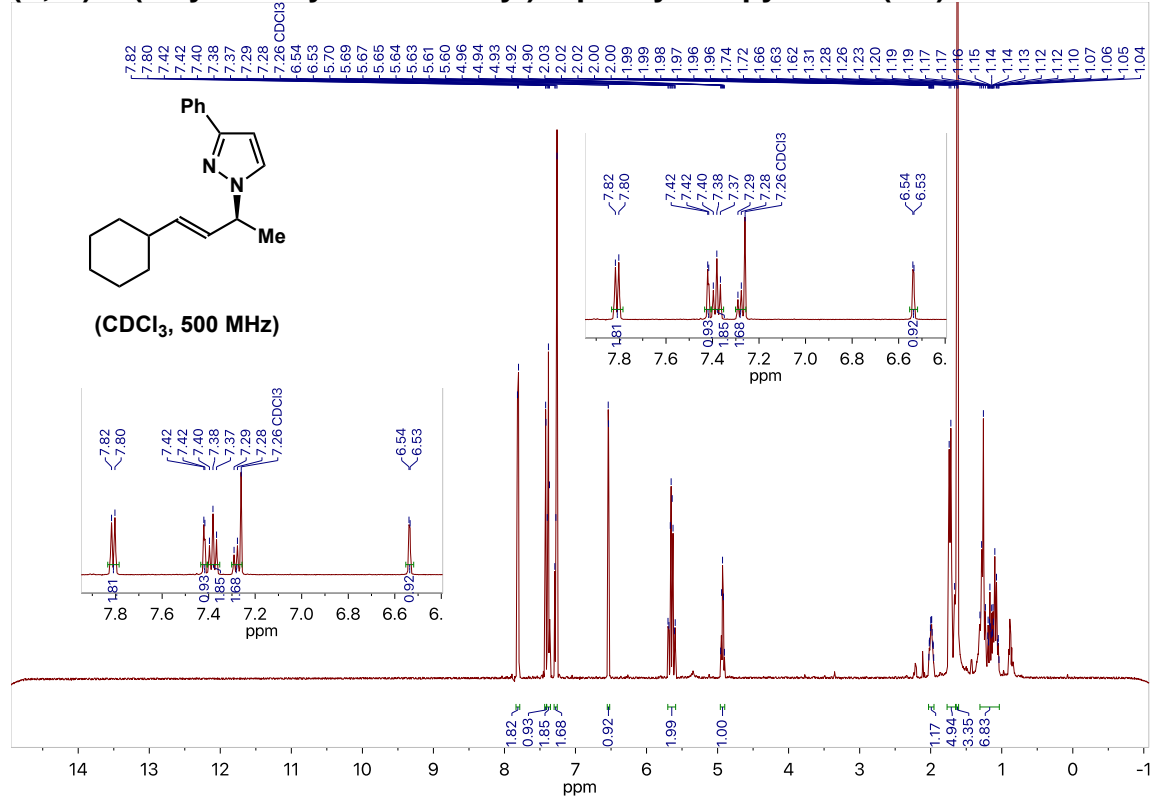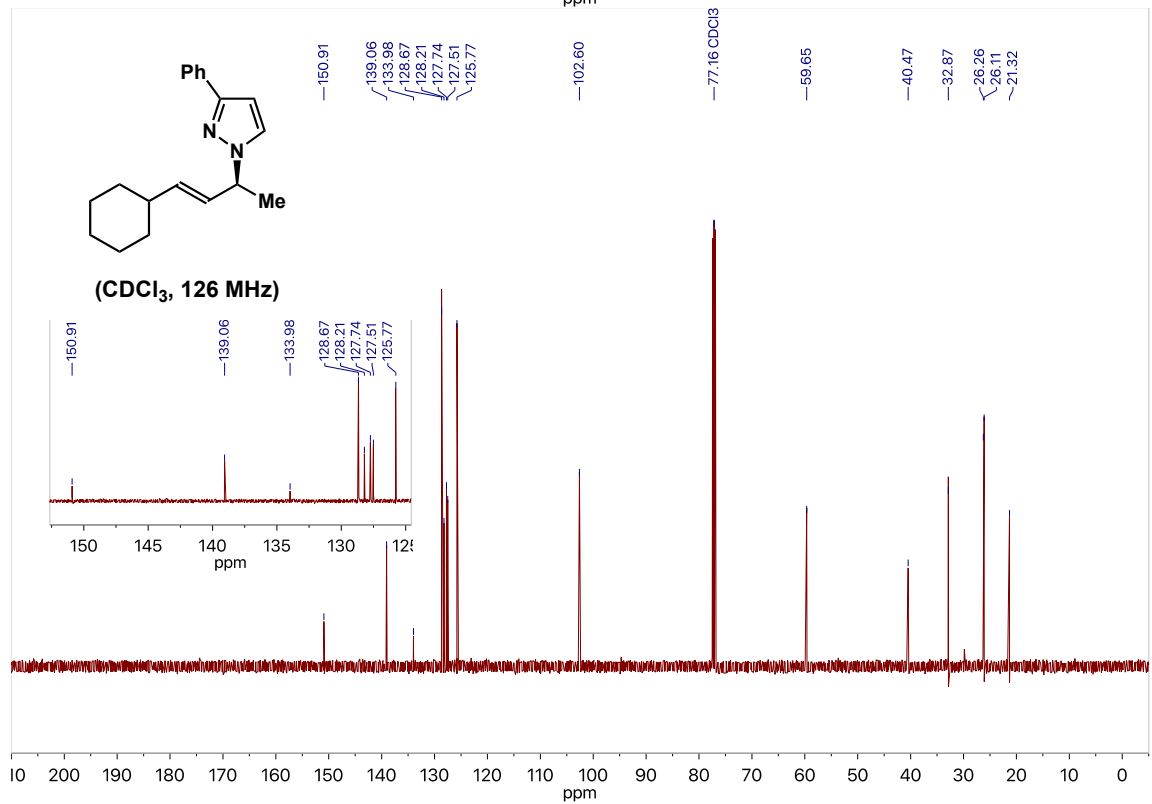

**(S)-1-(cyclohex-2-en-1-yl)-1H-pyrazole (3ma)**

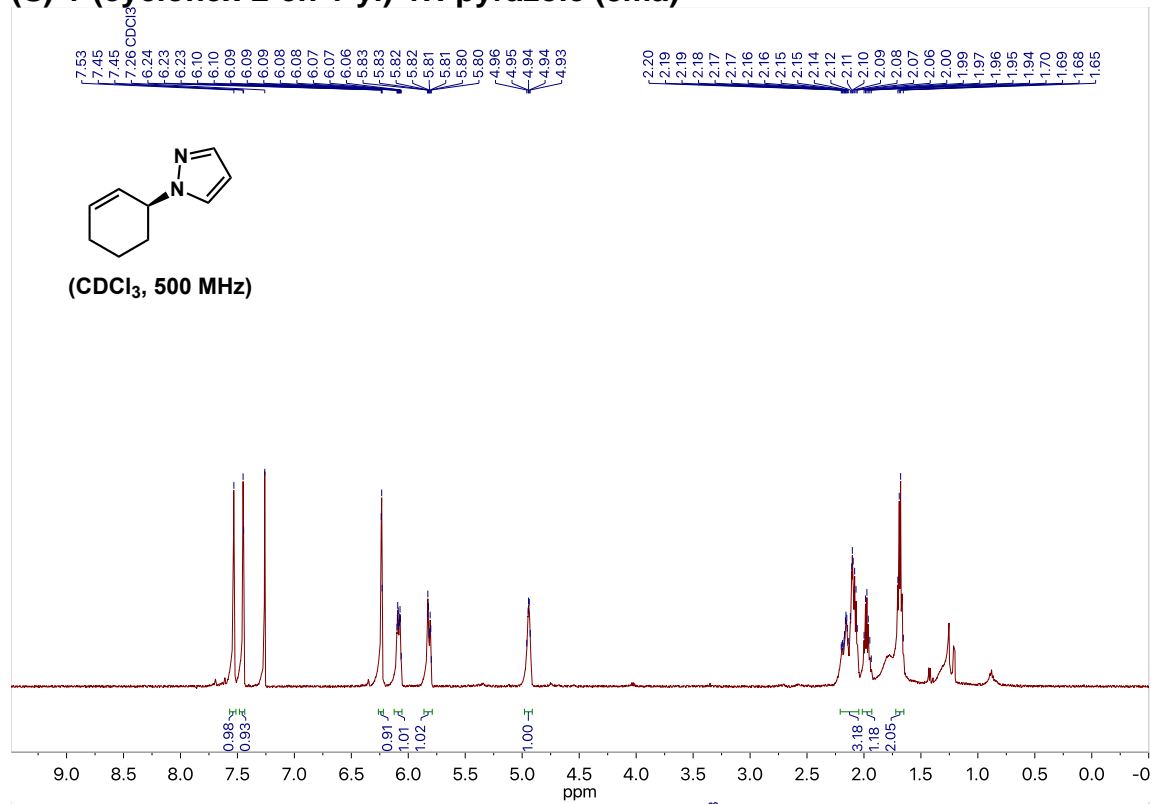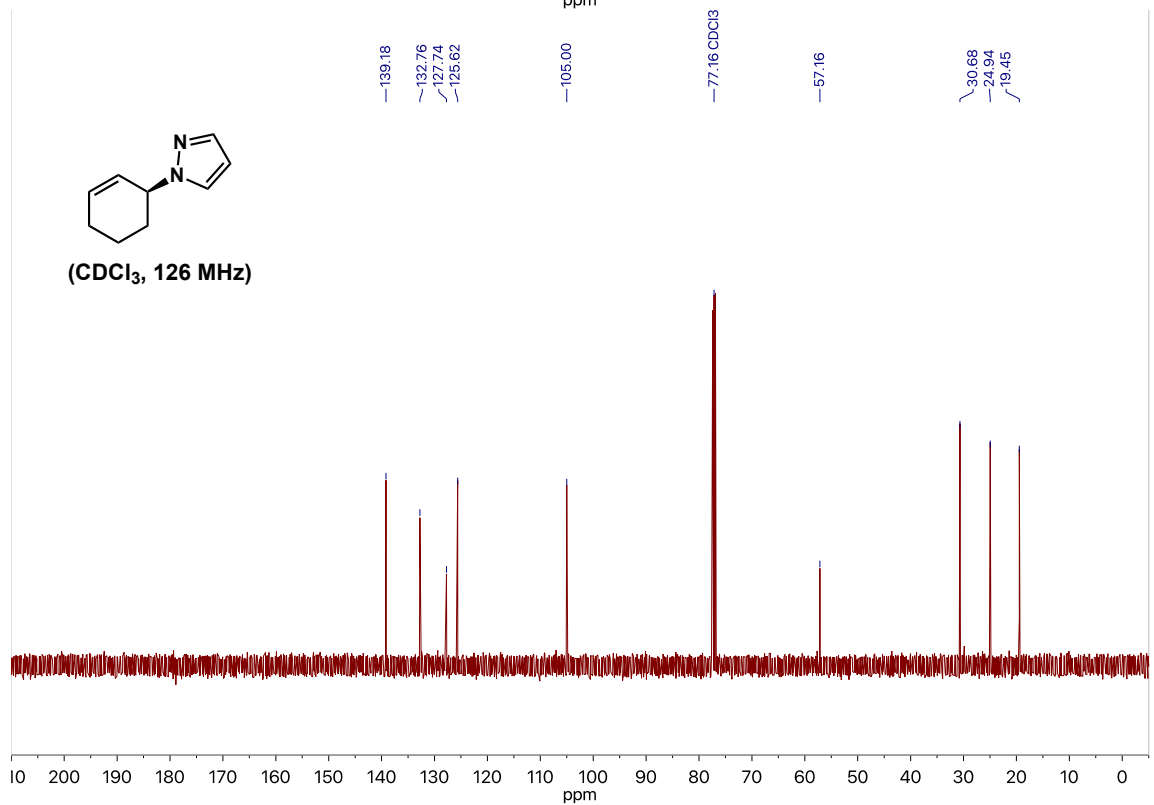

# 1-(2-methylbut-3-en-2-yl)-4-(4,4,5,5-tetramethyl-1,3,2-dioxaborolan-2-yl)-1H-pyrazole (3na)

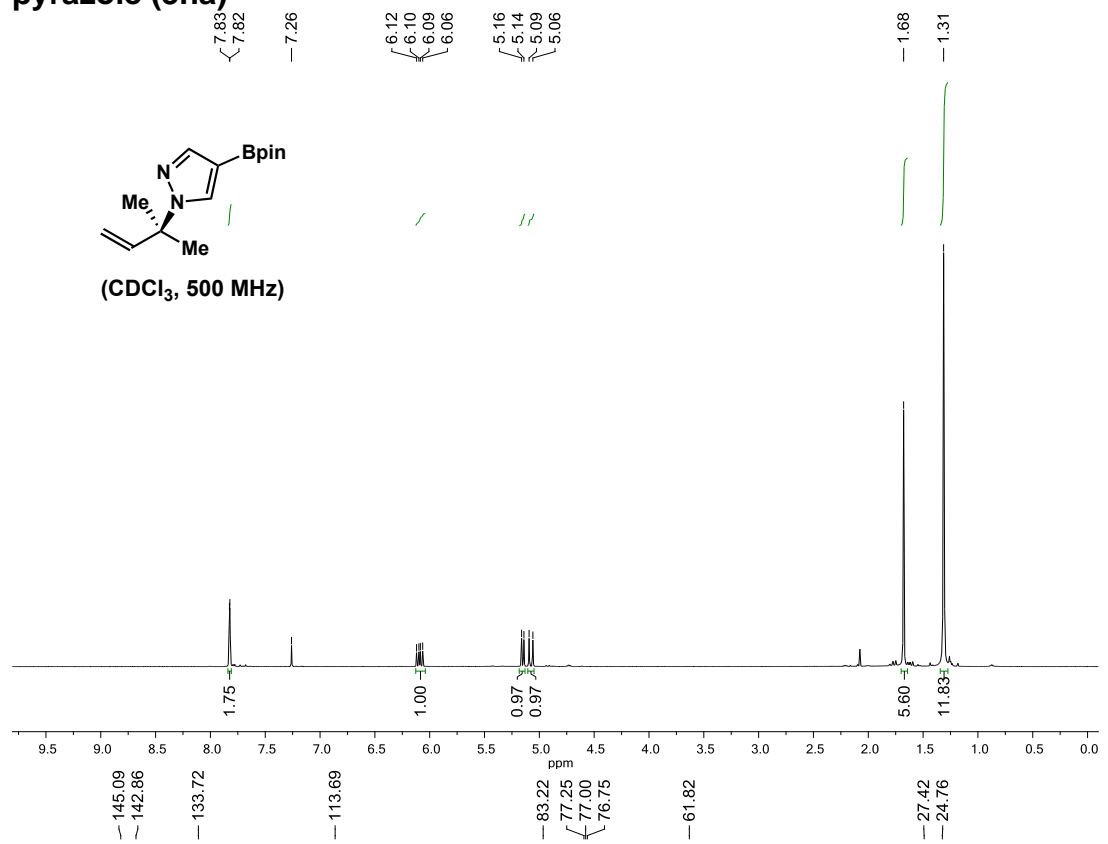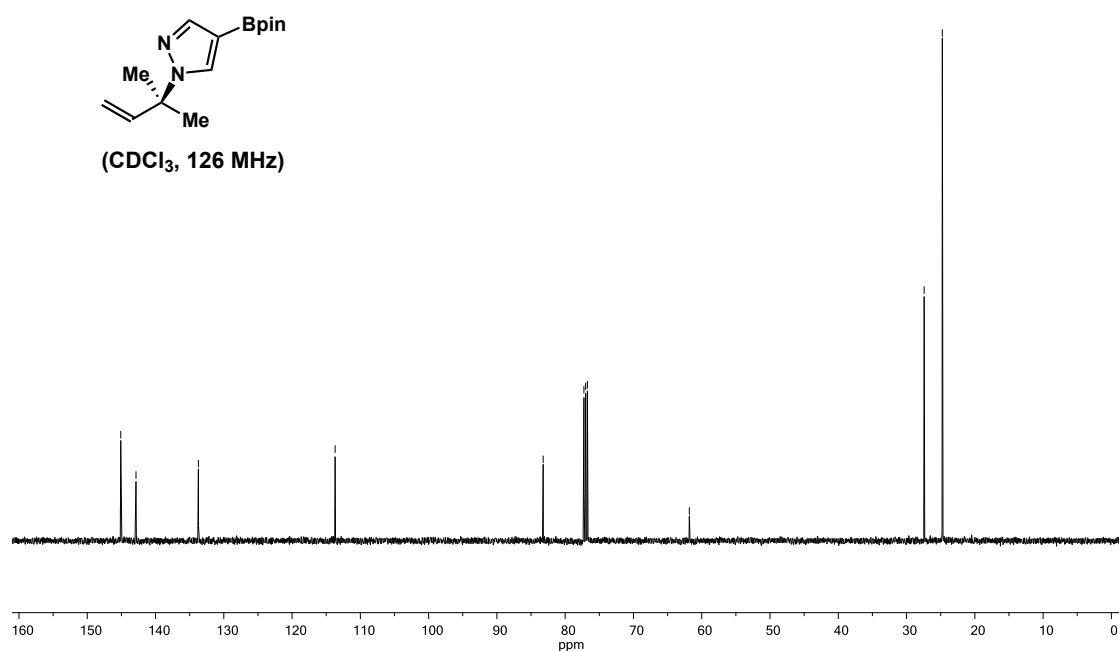

### (S)-1-(3,7-dimethylocta-1,6-dien-3-yl)-3-phenyl-1H-pyrazole (3oa)

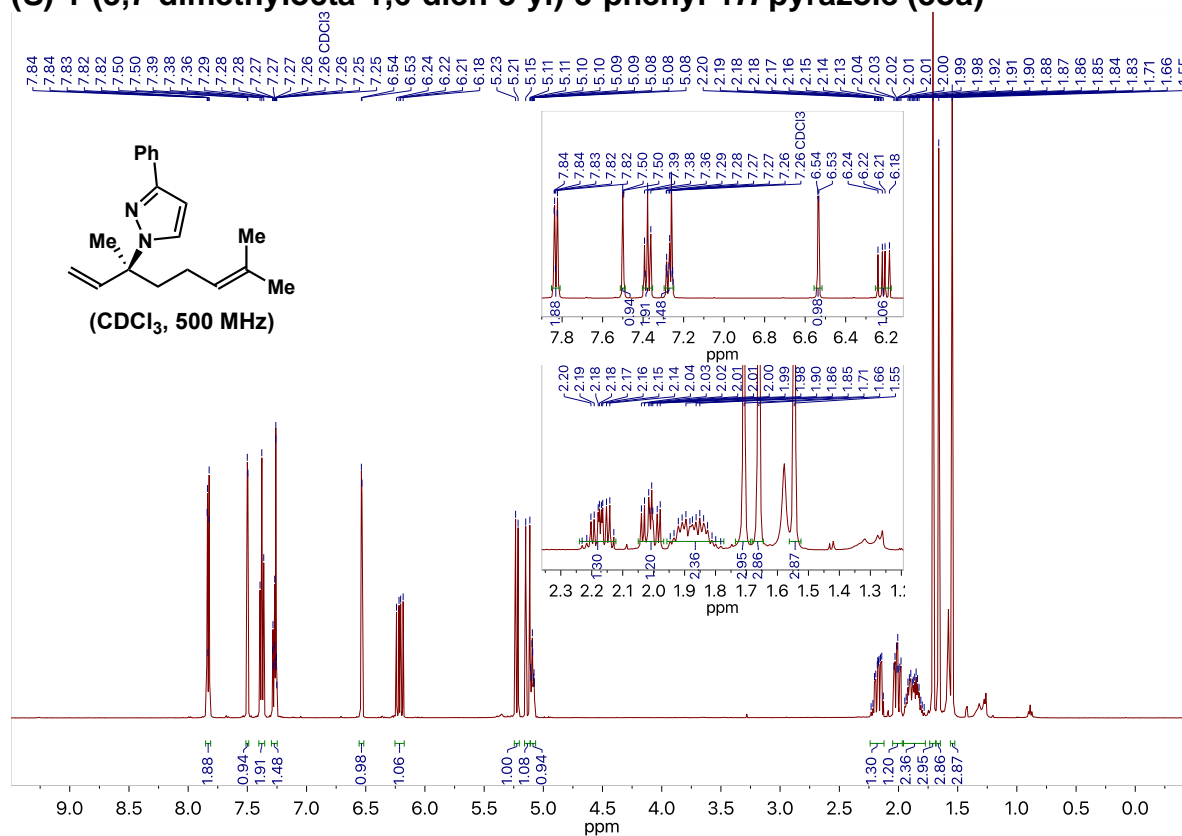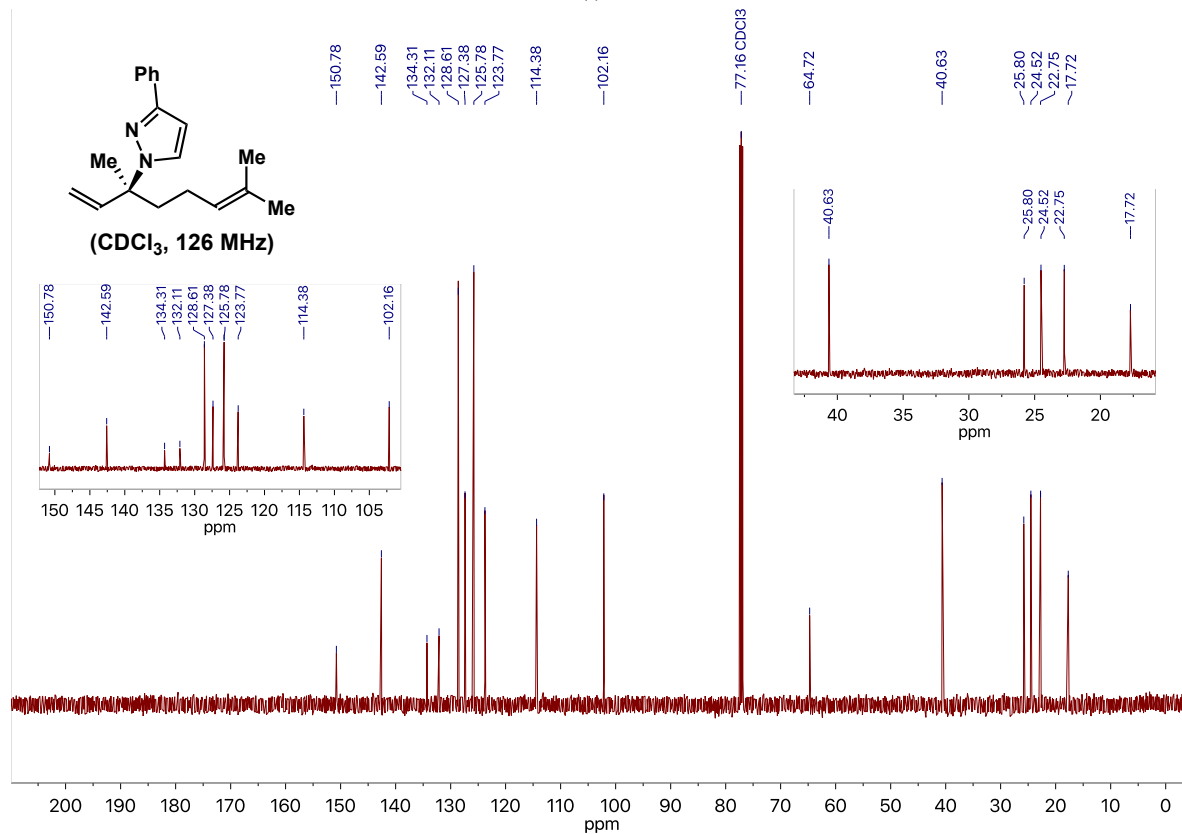



## 7. SFC spectra

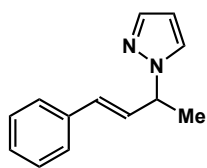

rac-3aa

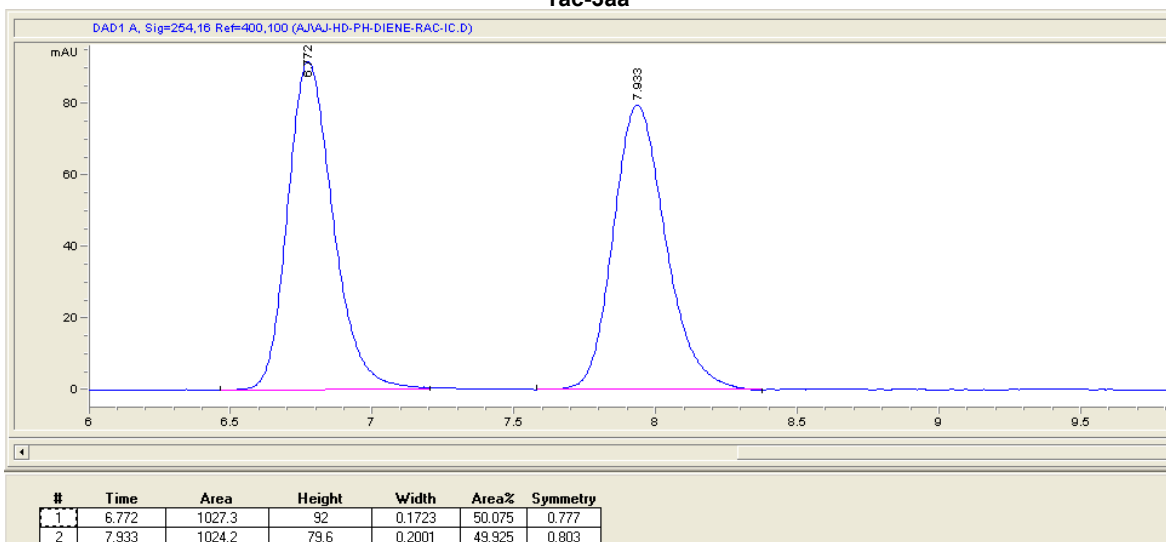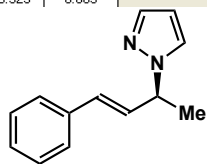

3aa

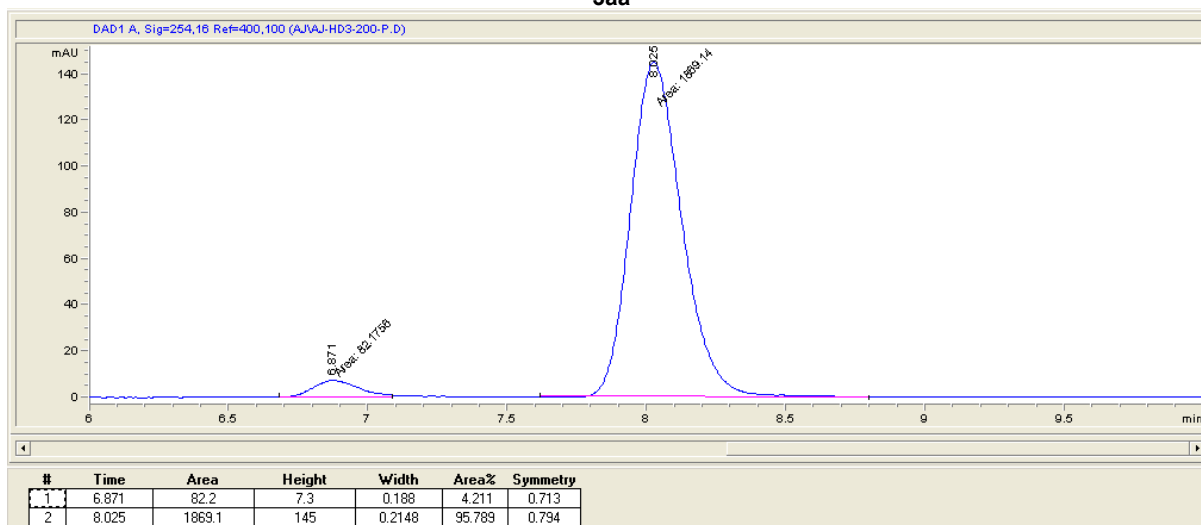

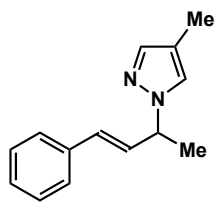

rac-3ab

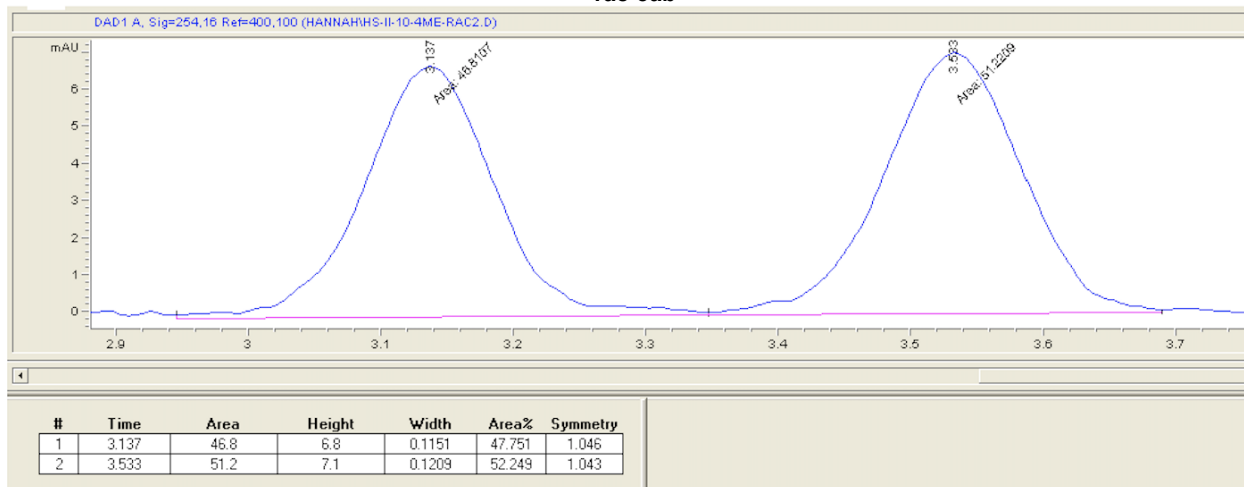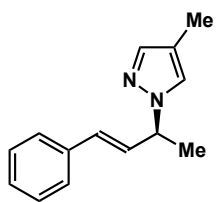

3ab

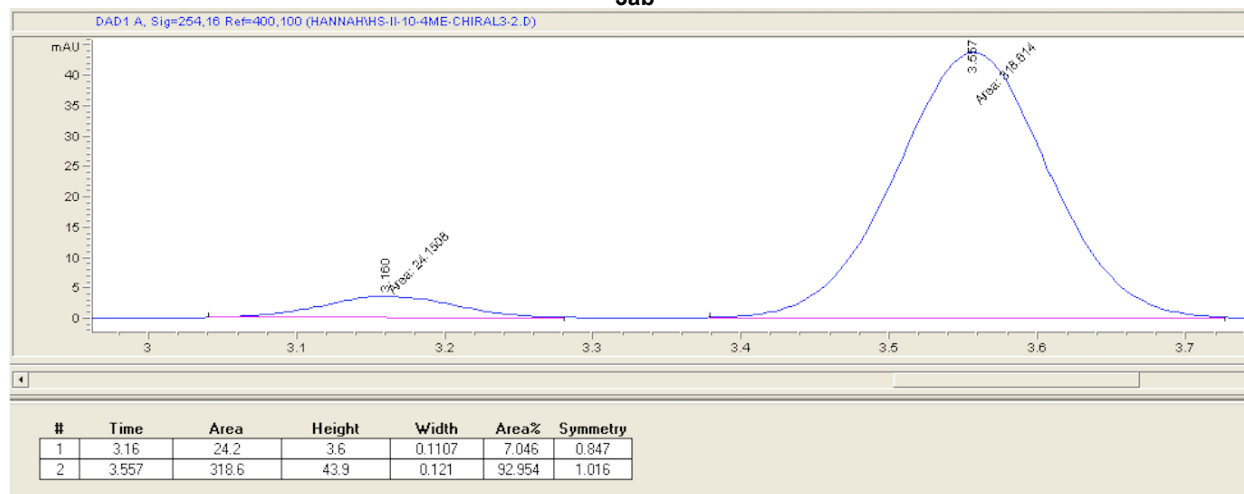

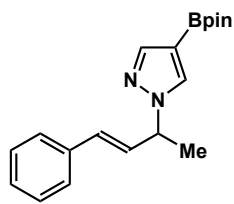

rac-3ac

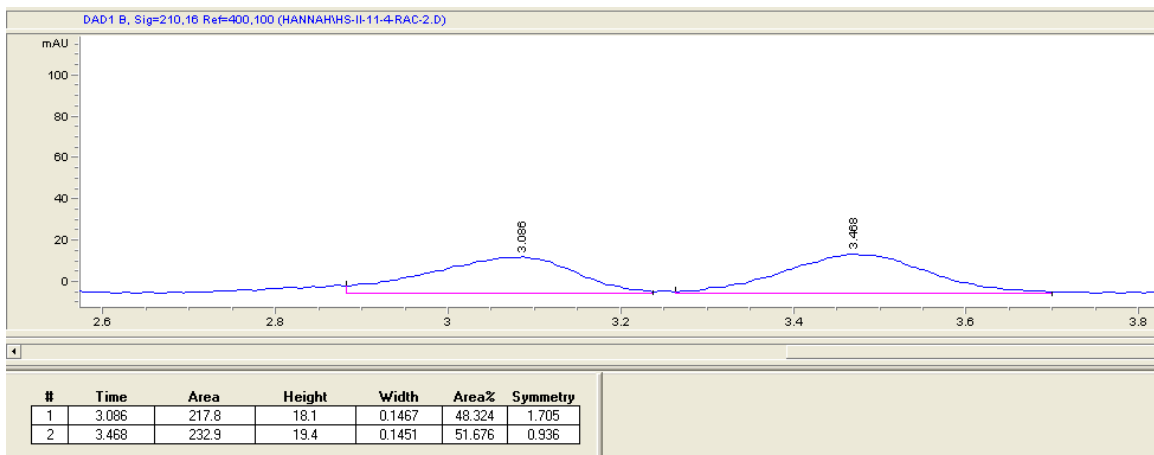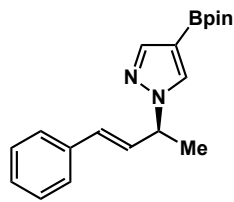

3ac

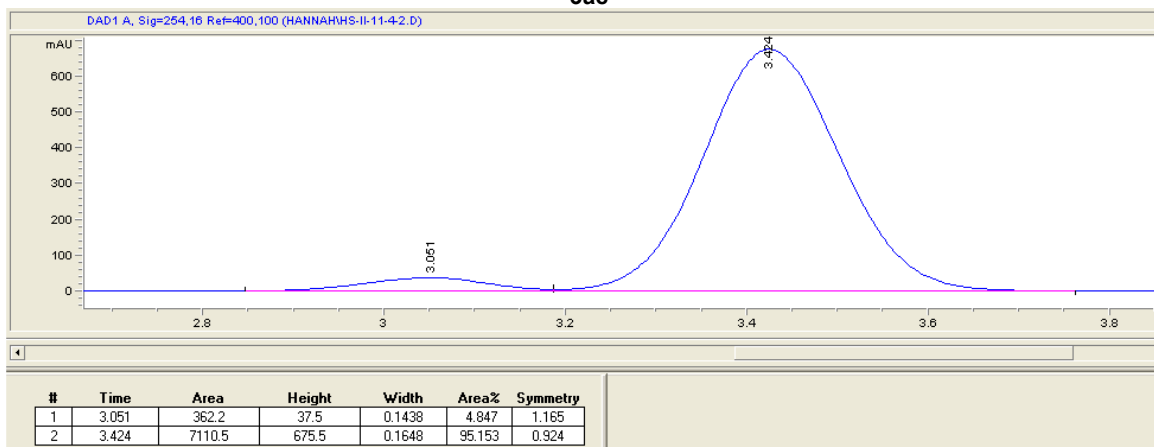



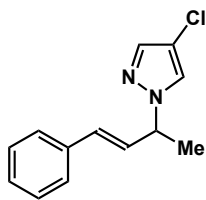

rac-3ad

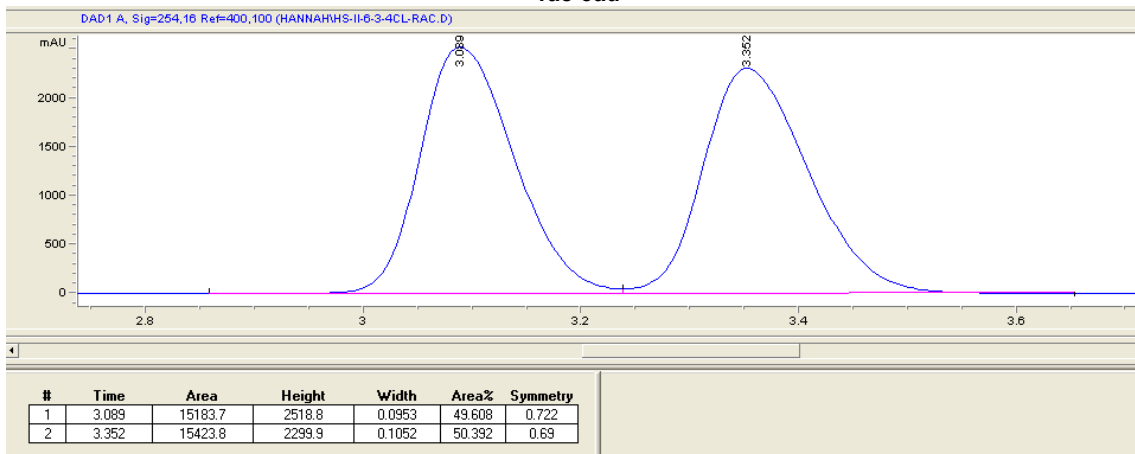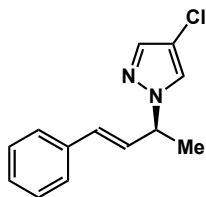

3ad

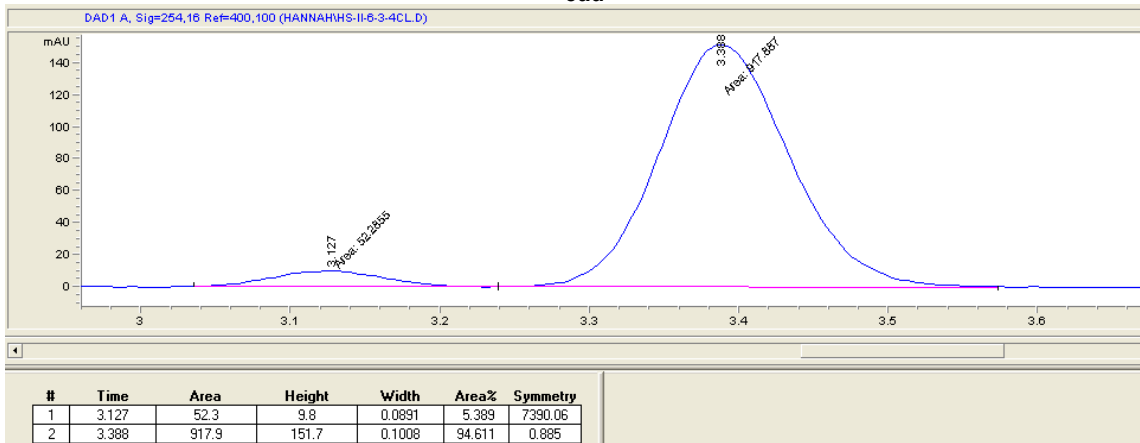

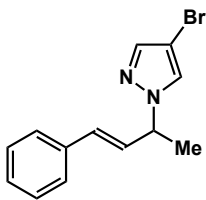

rac-3ae

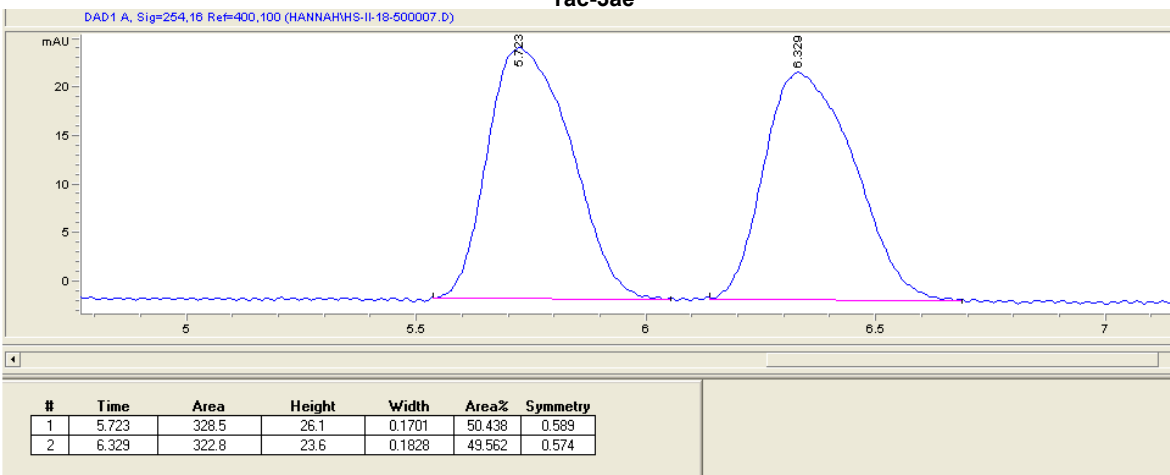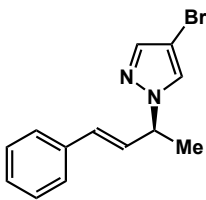

3ae

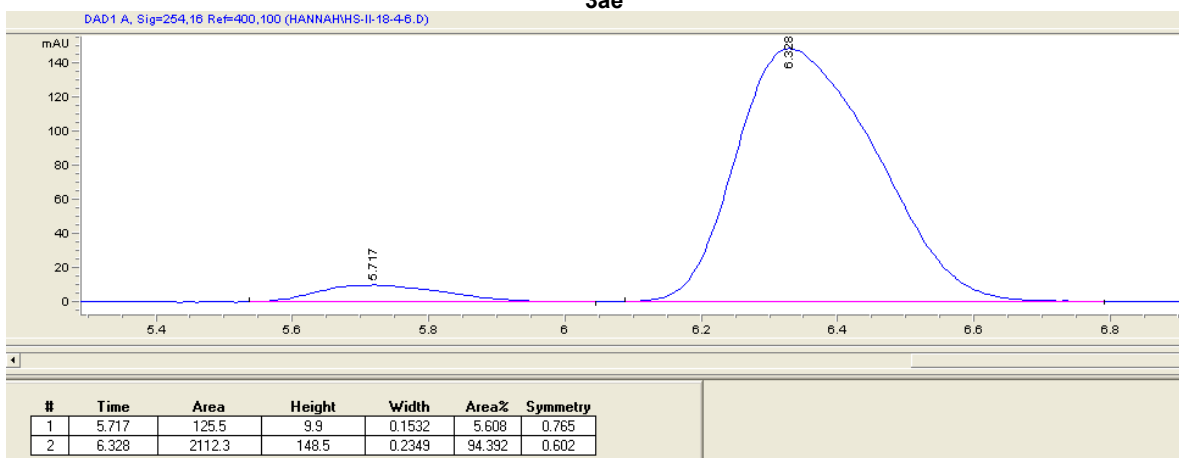

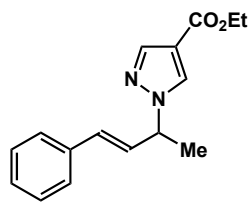

rac-3af

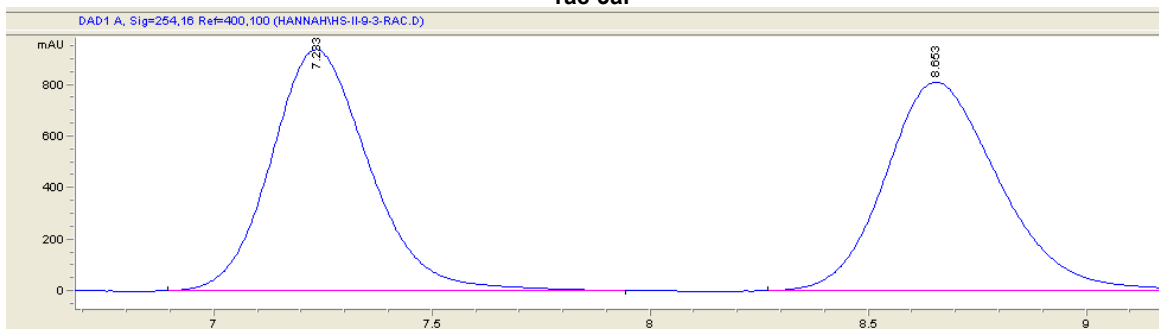

| # | Time  | Area    | Height | Width  | Area%  | Symmetry |
|---|-------|---------|--------|--------|--------|----------|
| 1 | 7.233 | 14682.6 | 935.4  | 0.2411 | 49.830 | 0.803    |
| 2 | 8.653 | 14782.9 | 810    | 0.2789 | 50.170 | 0.757    |

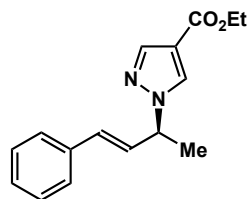

3af

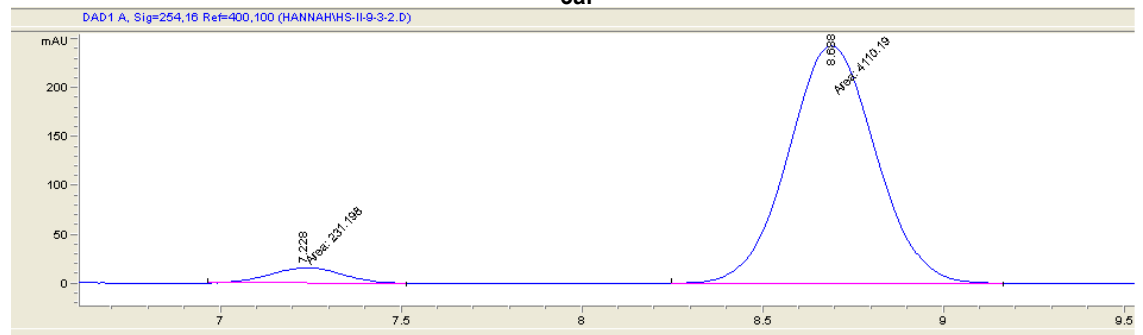

| # | Time  | Area   | Height | Width  | Area%  | Symmetry |
|---|-------|--------|--------|--------|--------|----------|
| 1 | 7.228 | 231.2  | 16.1   | 0.2387 | 5.325  | 0.861    |
| 2 | 8.688 | 4110.2 | 243    | 0.2819 | 94.675 | 0.94     |

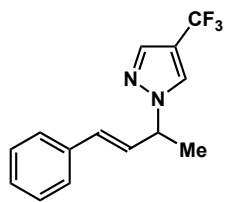

rac-3ag

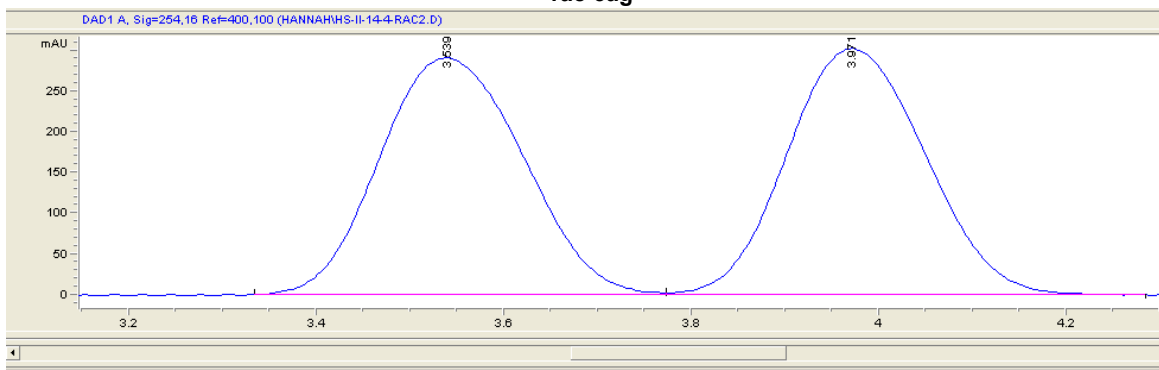

| # | Time  | Area   | Height | Width  | Area%  | Symmetry |
|---|-------|--------|--------|--------|--------|----------|
| 1 | 3.539 | 3110.3 | 291.3  | 0.1696 | 49.990 | 0.853    |
| 2 | 3.971 | 3111.6 | 302.9  | 0.1638 | 50.010 | 0.866    |

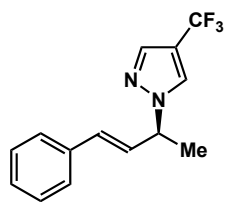

3ag

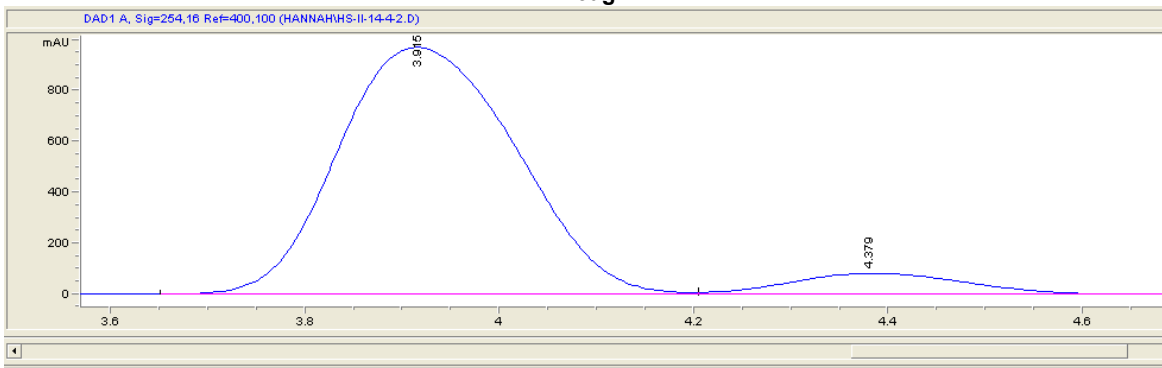

| # | Time  | Area    | Height | Width  | Area%  | Symmetry |
|---|-------|---------|--------|--------|--------|----------|
| 1 | 3.915 | 12300.6 | 970.4  | 0.2079 | 92.380 | 0.782    |
| 2 | 4.379 | 1014.6  | 82.2   | 0.161  | 7.620  | 0.773    |

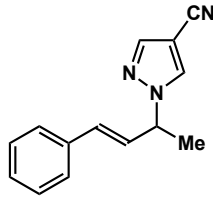

rac-3ah

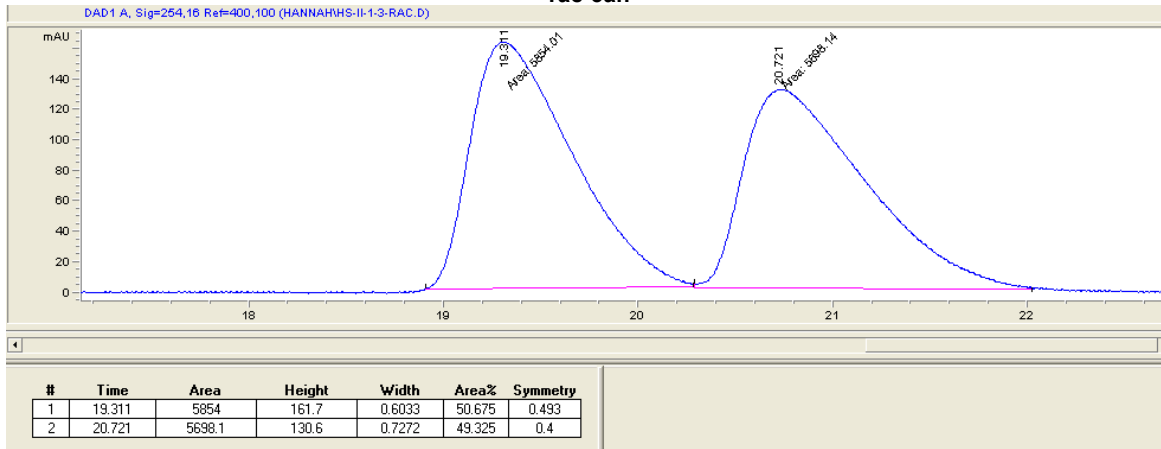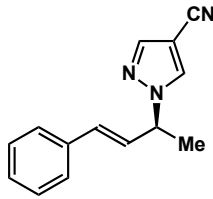

3ah

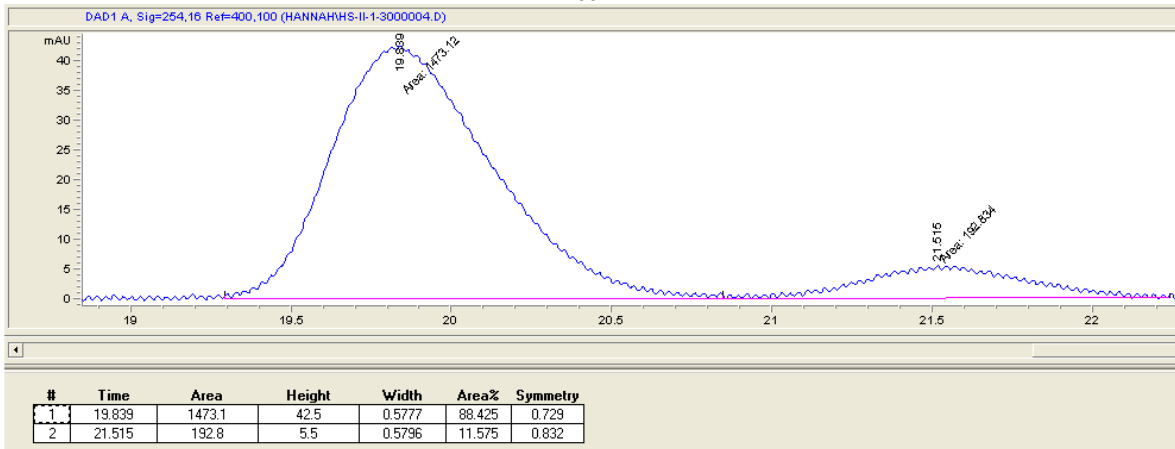

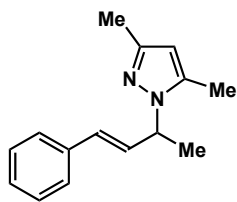

rac-3ai

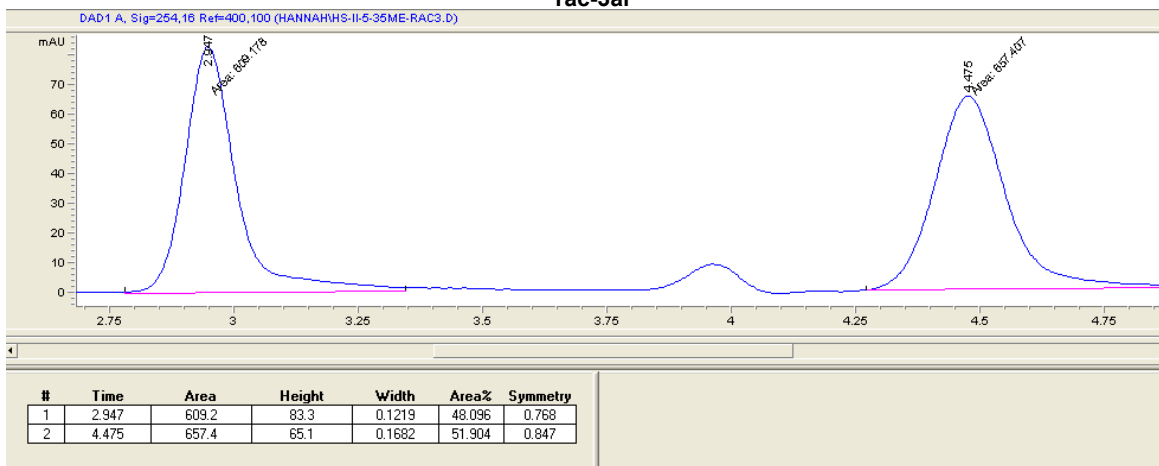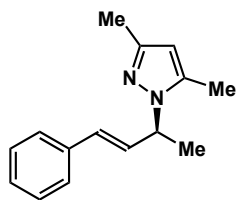

3ai

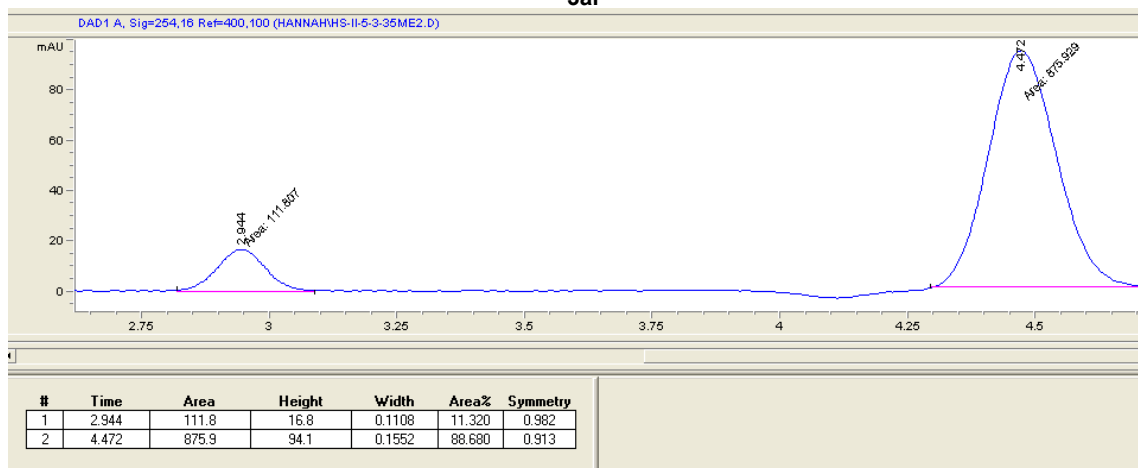

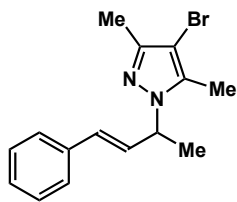

rac-3aj

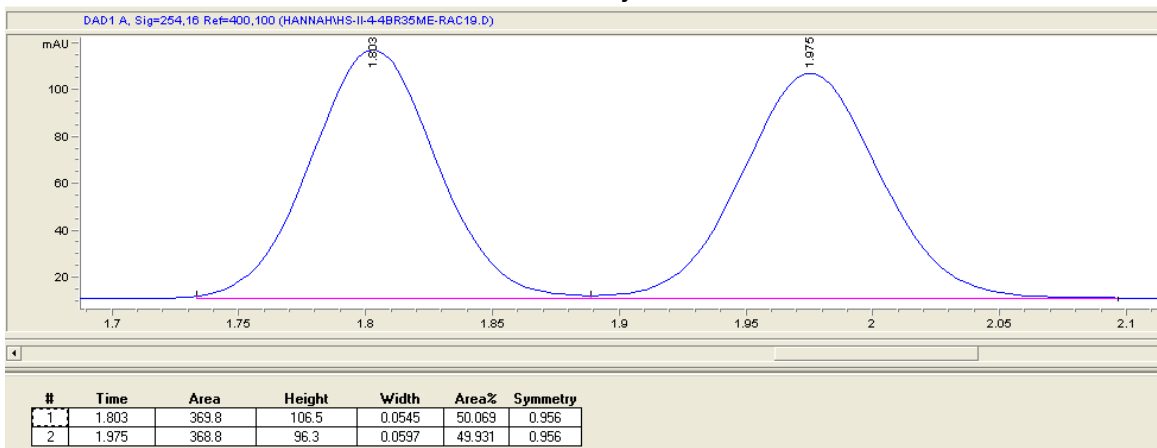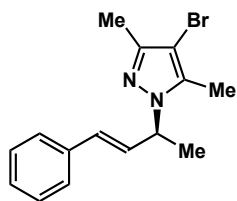

3aj

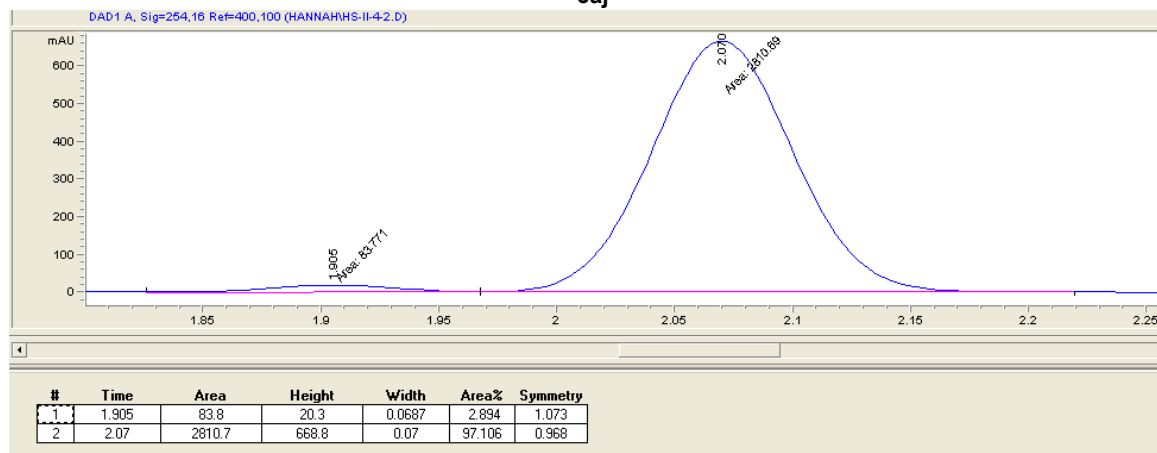

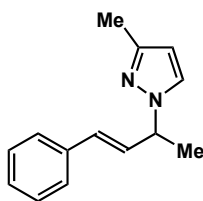

rac-3ak

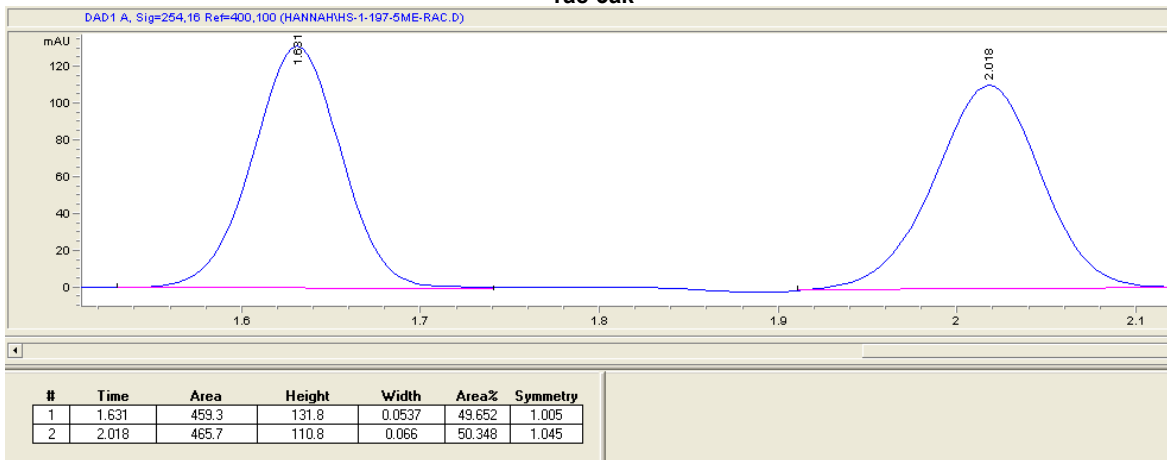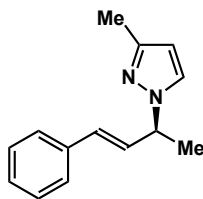

3ak

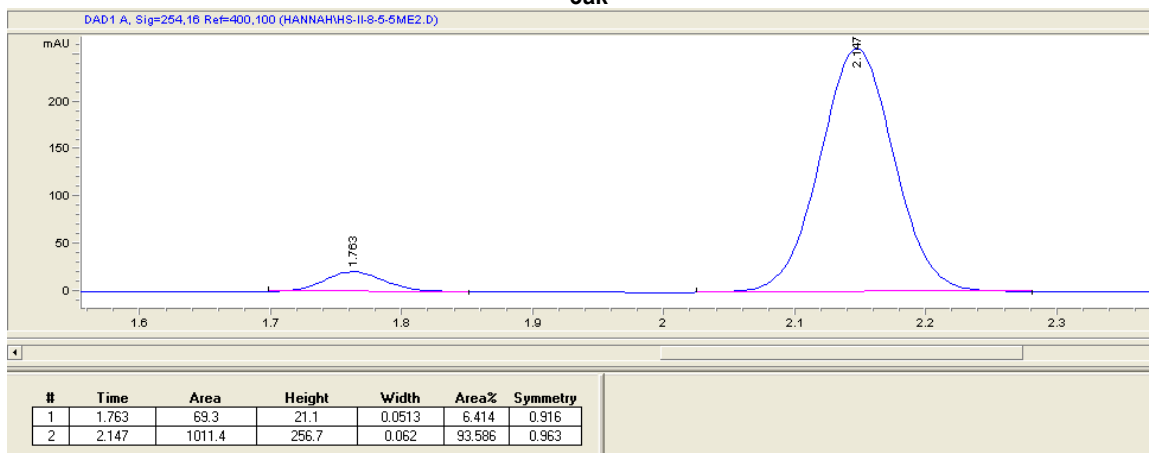



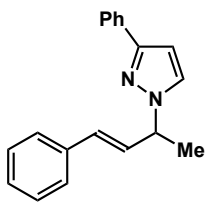

rac-3al

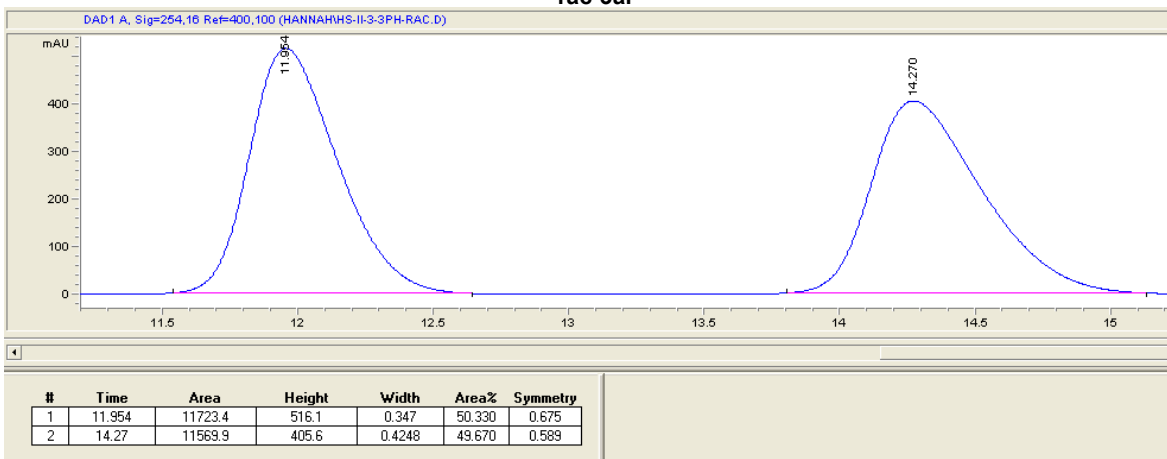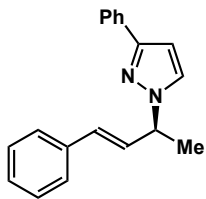

3al

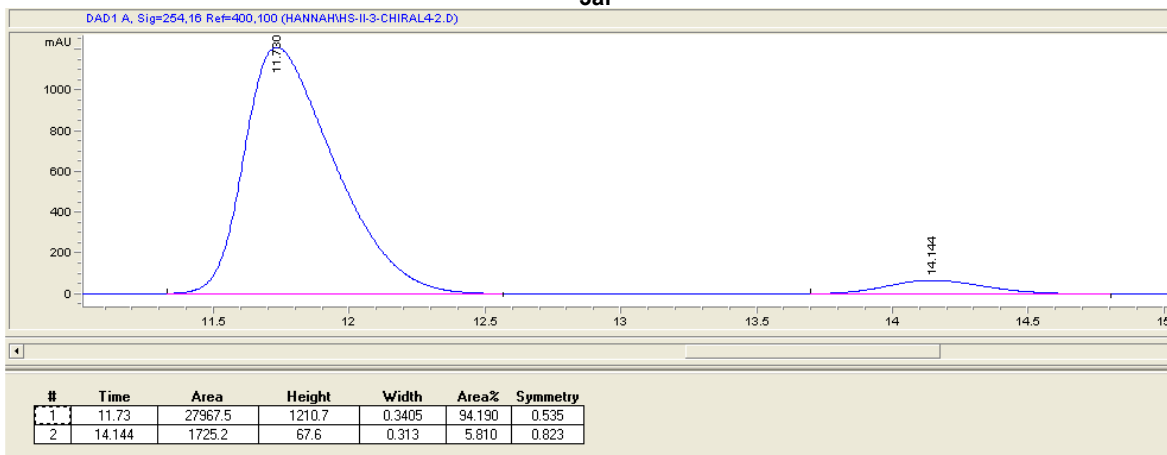

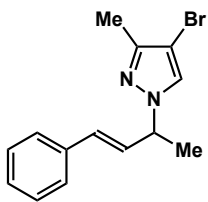

rac-3am

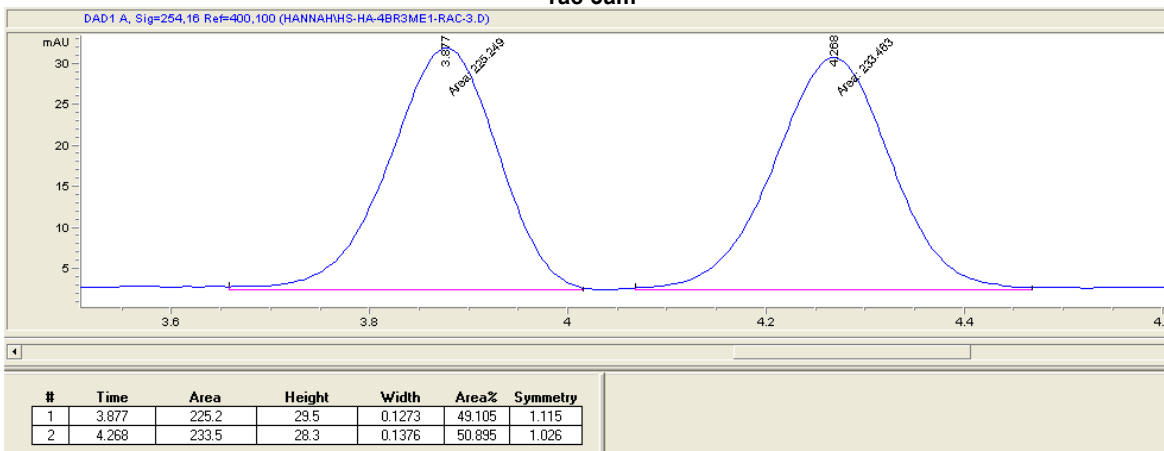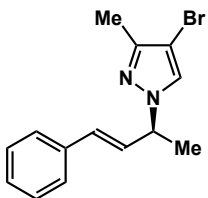

3am

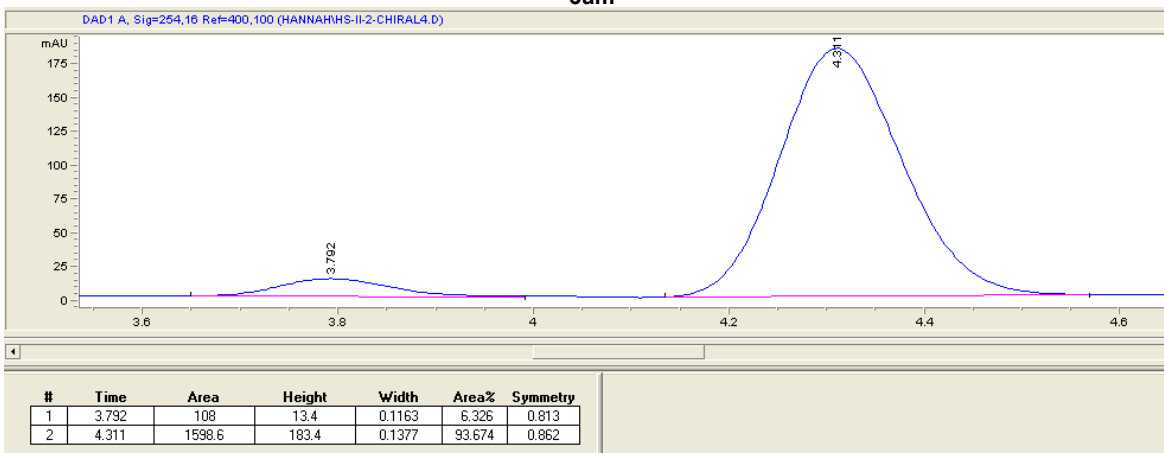

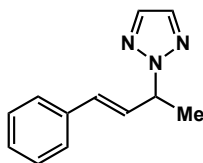

rac-3an

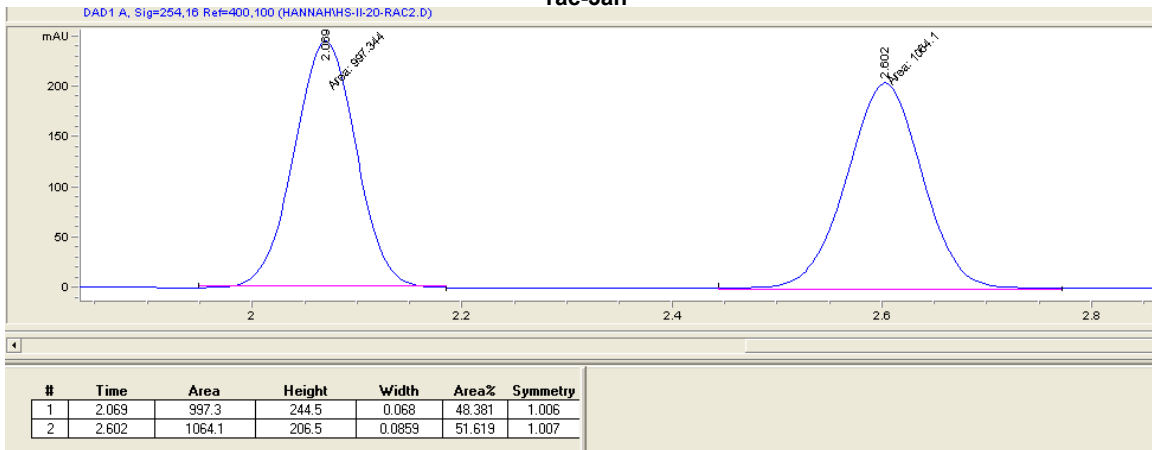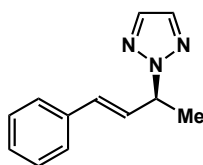

3an

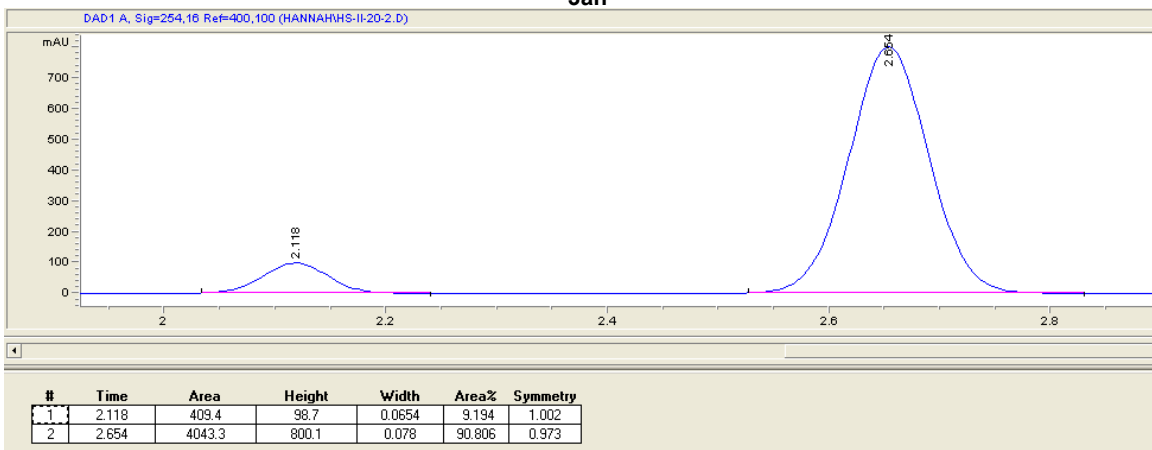

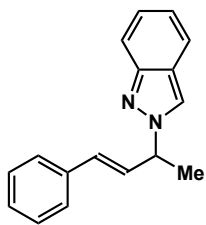

rac-3ap

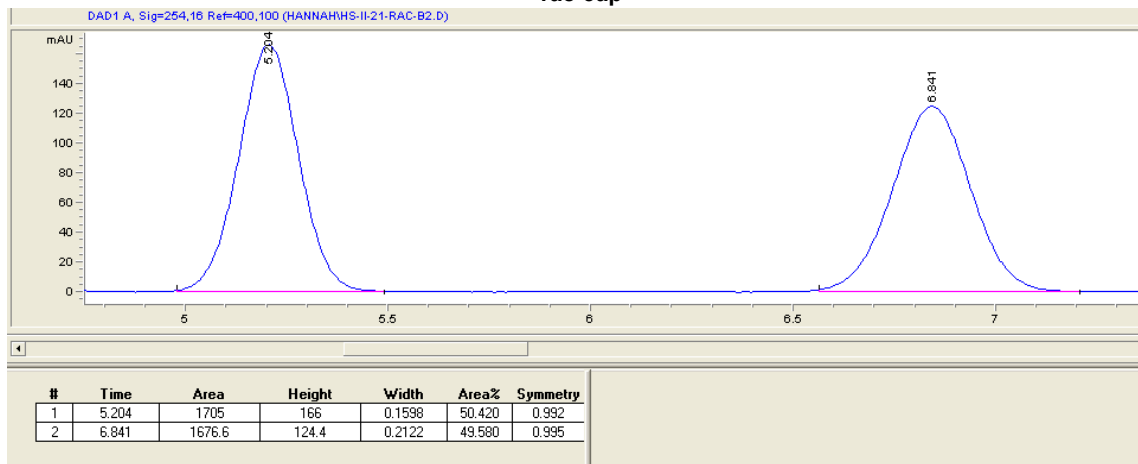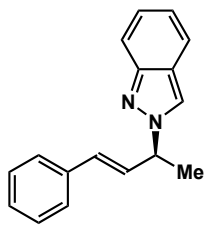

3ap

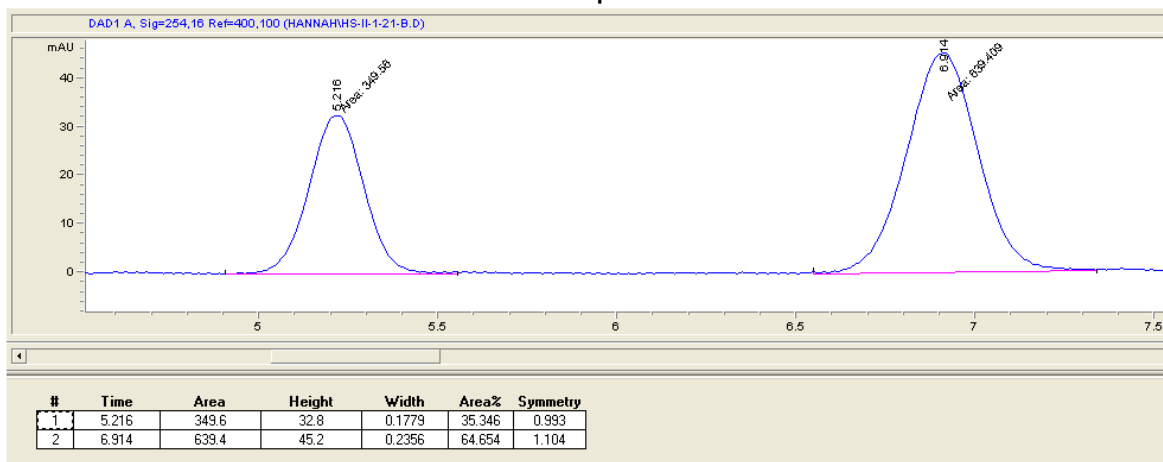

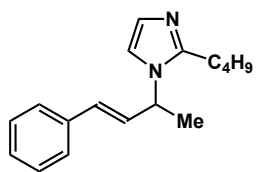

rac-3aq

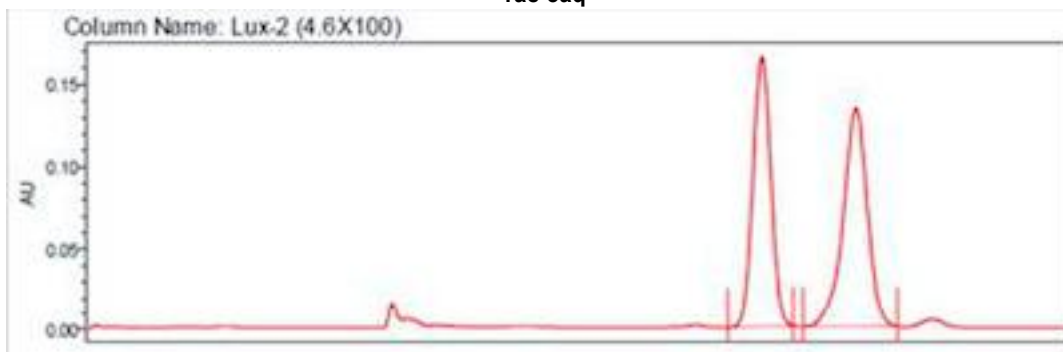

| Retention Time (mins) | % Area | Base Peak (m/z) |
|-----------------------|--------|-----------------|
| 0.687                 | 47.59  | 255.36          |
| 0.783                 | 52.41  | 255.37          |

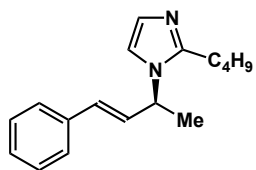

3aq

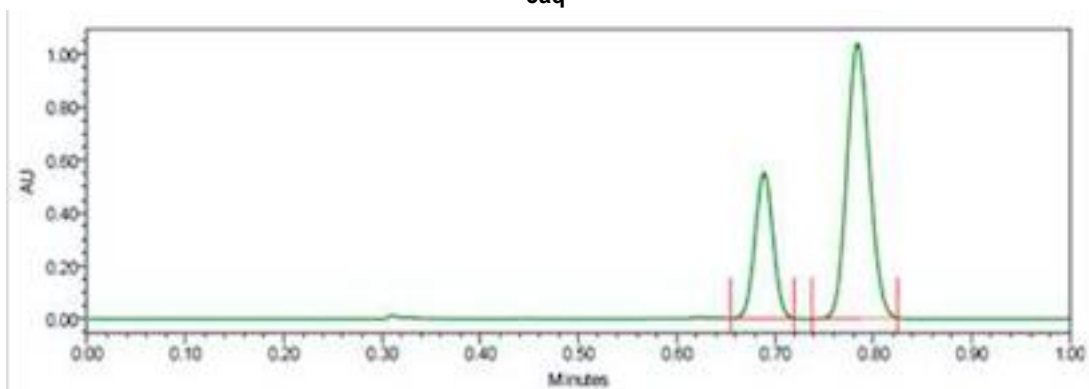

| Retention Time (mins) | % Area | Base Peak (m/z) |
|-----------------------|--------|-----------------|
| 0.689                 | 29.89  | 255.36          |
| 0.784                 | 70.11  | 255.37          |

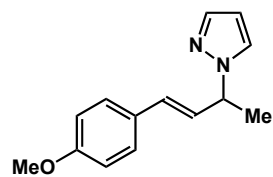

rac-3ba

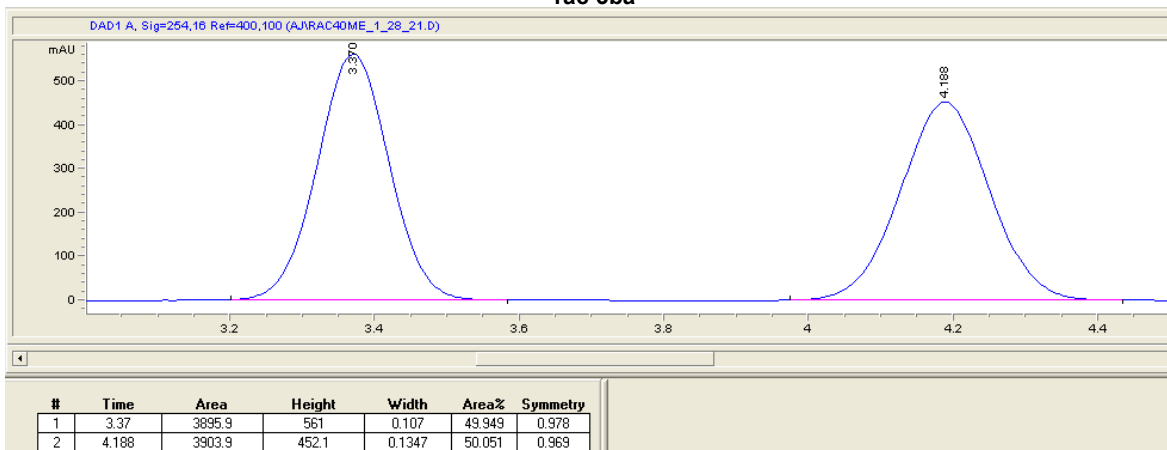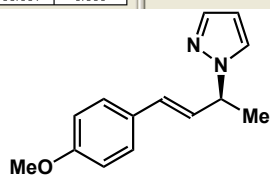

3ba

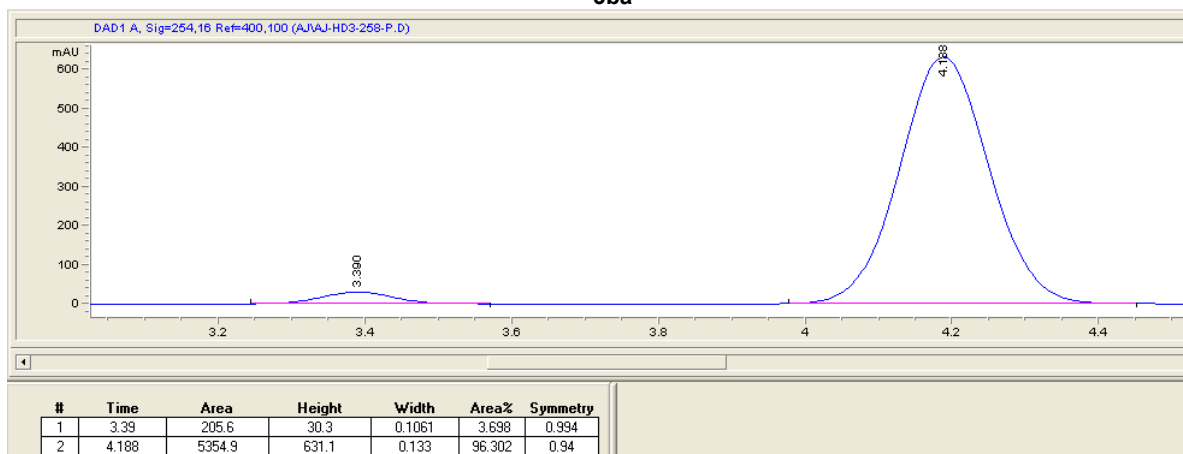

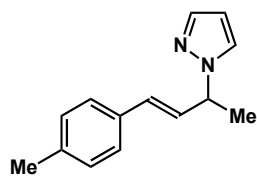

rac-3ca

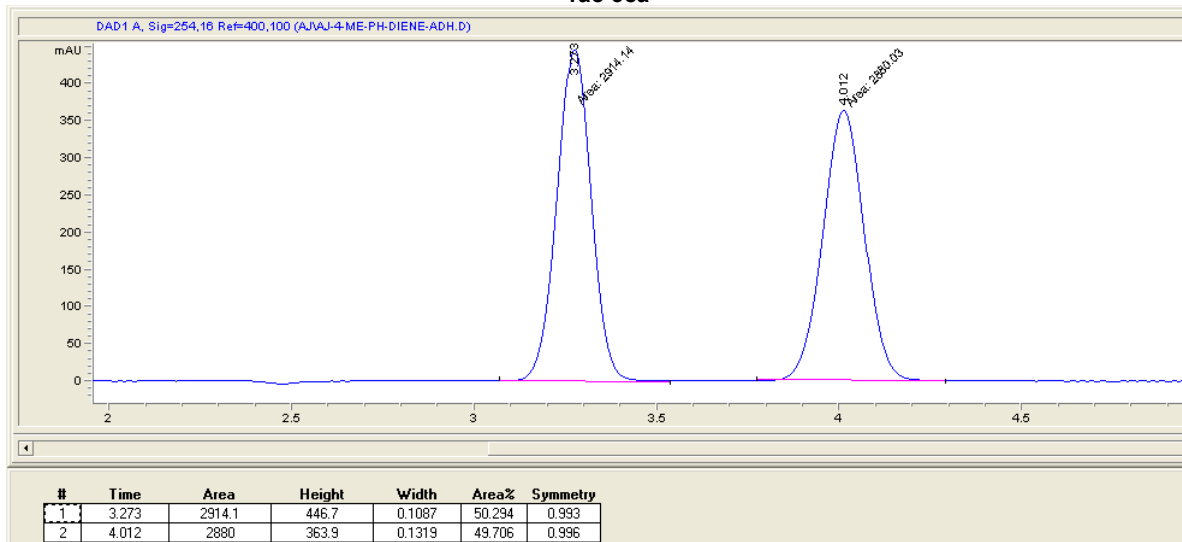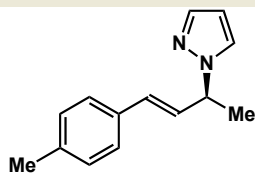

3ca

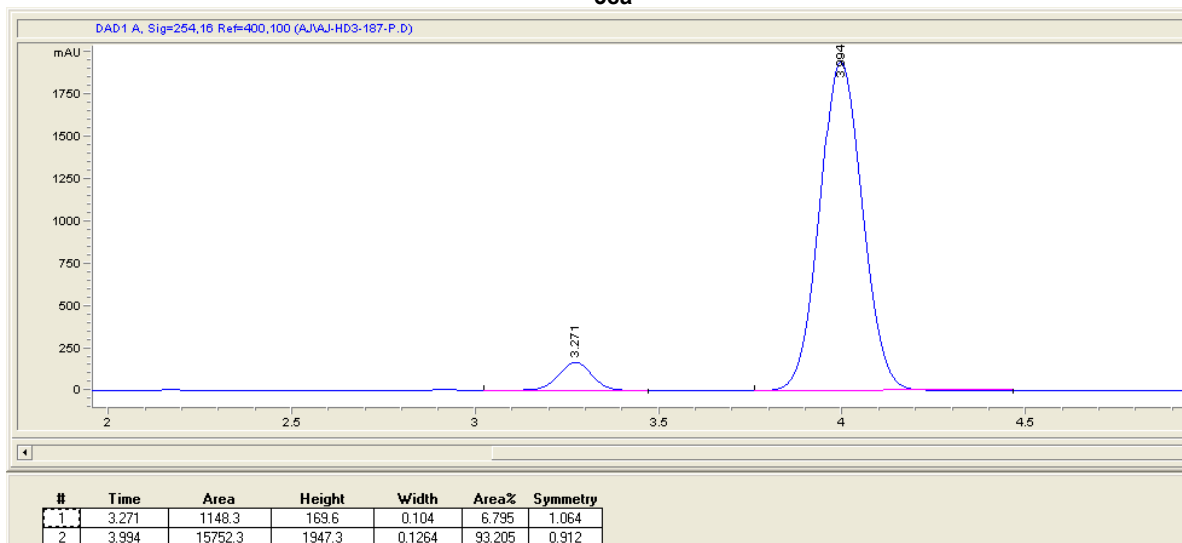

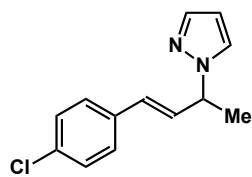

rac-3da

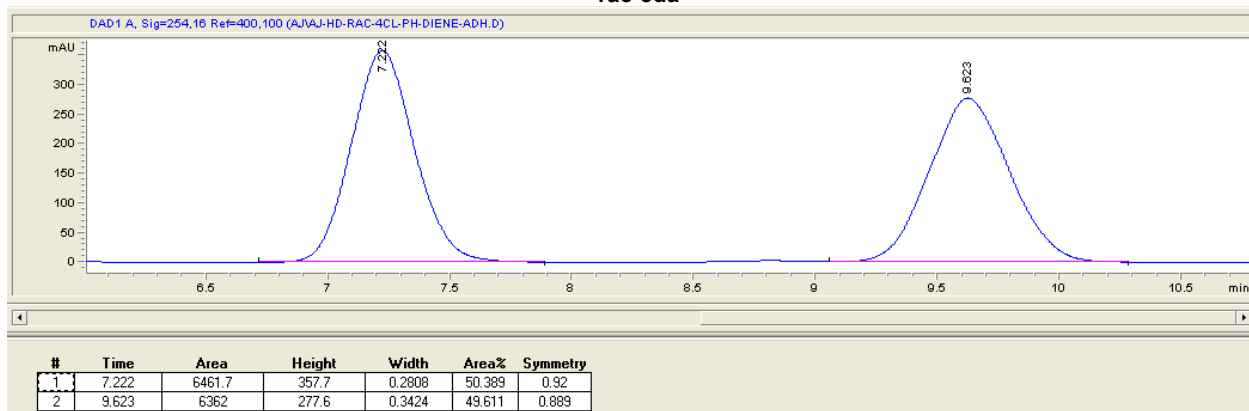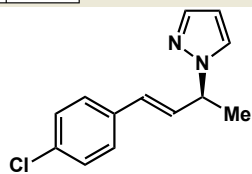

3da

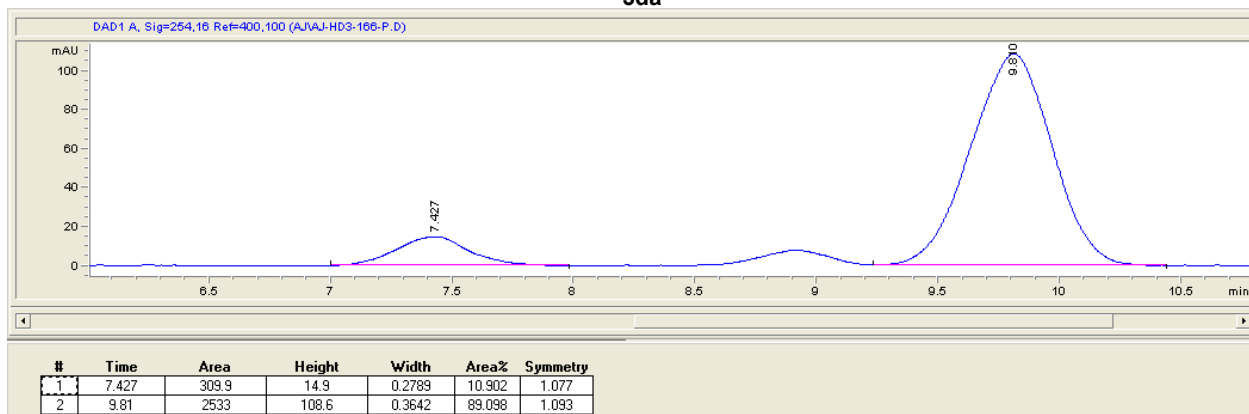



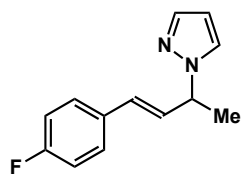

rac-3ea

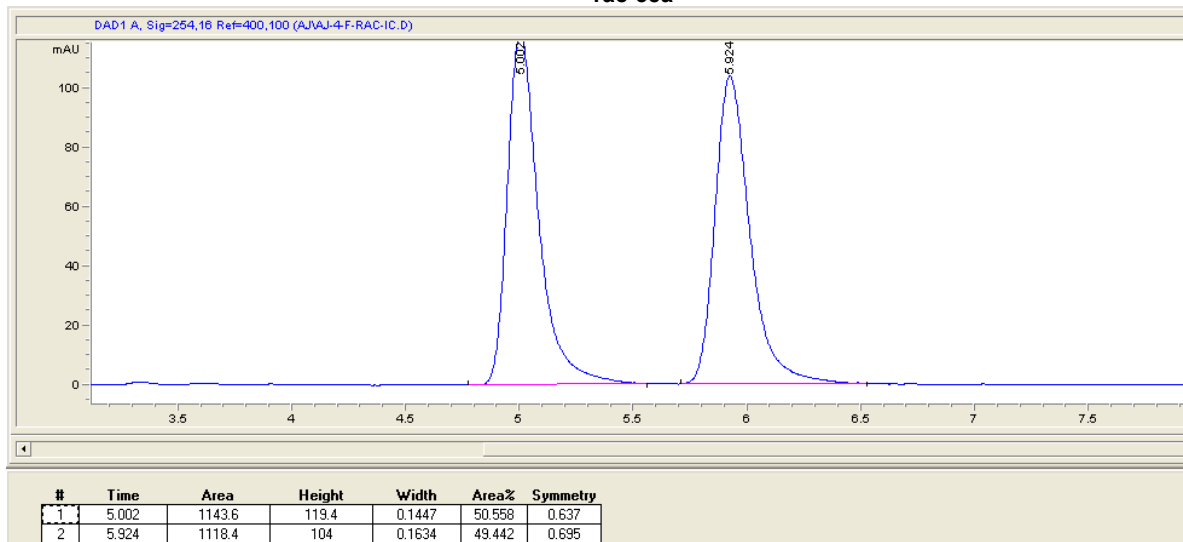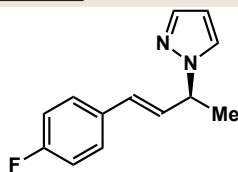

3ea

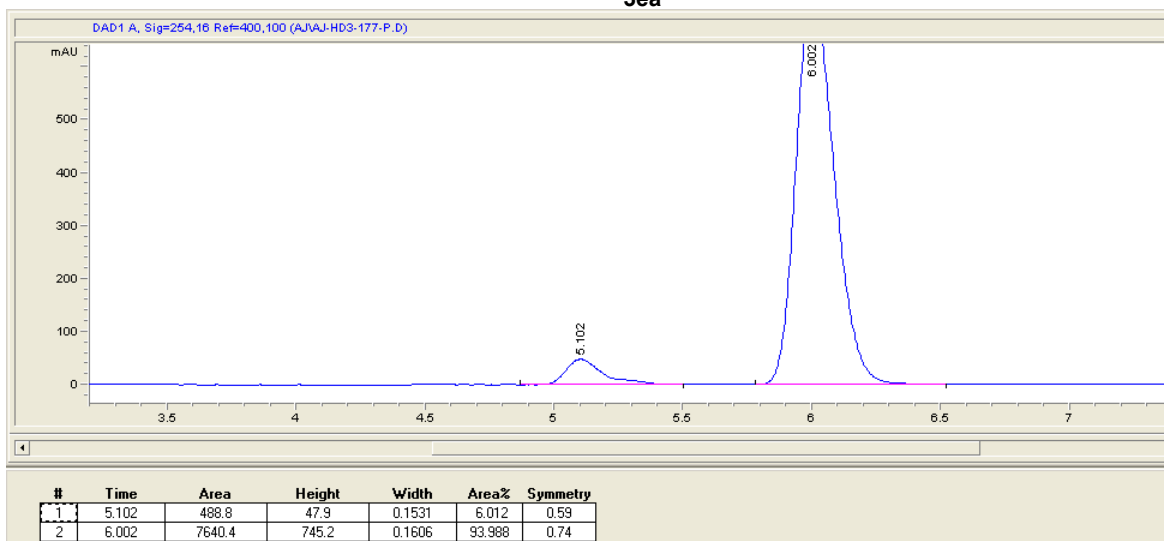

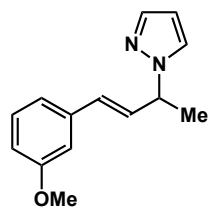

rac-3fa

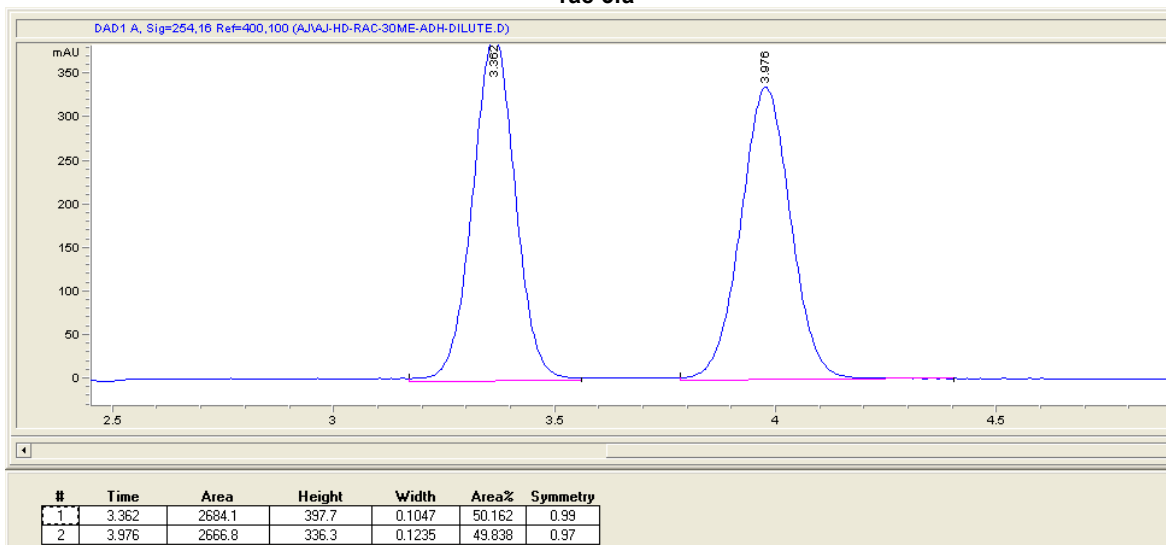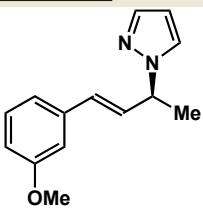

3fa

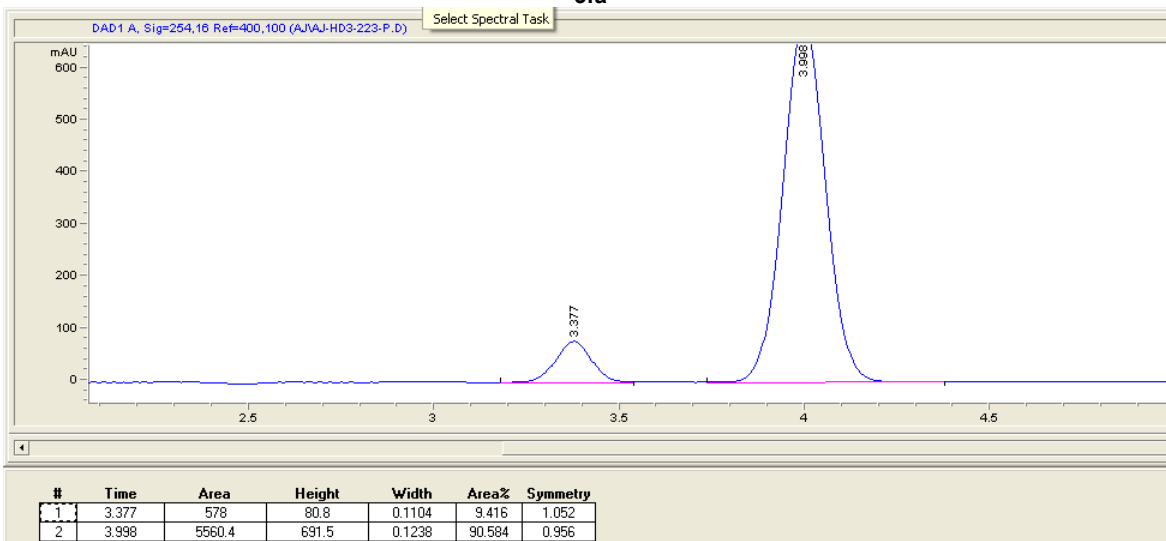

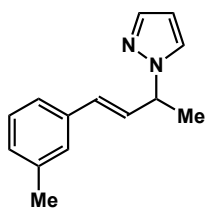

rac-3ga

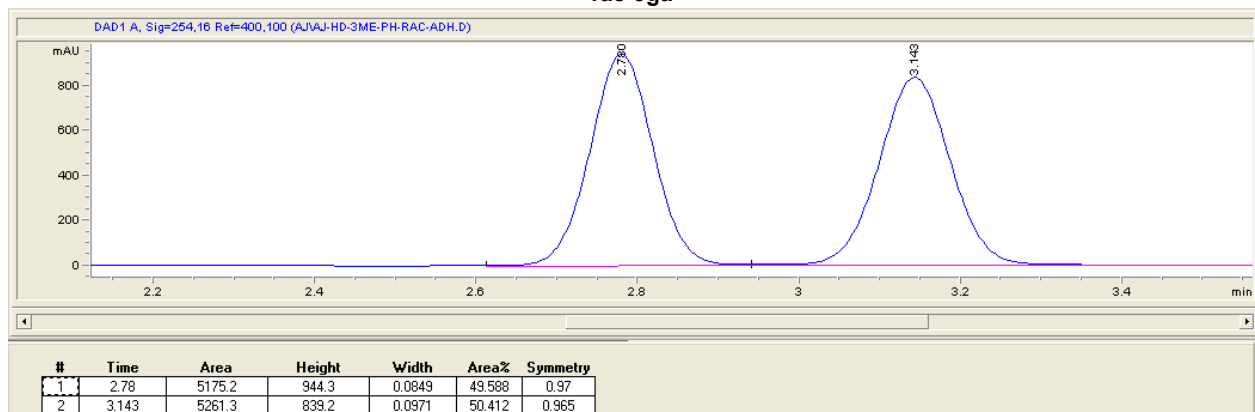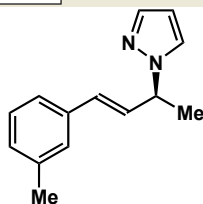

3ga

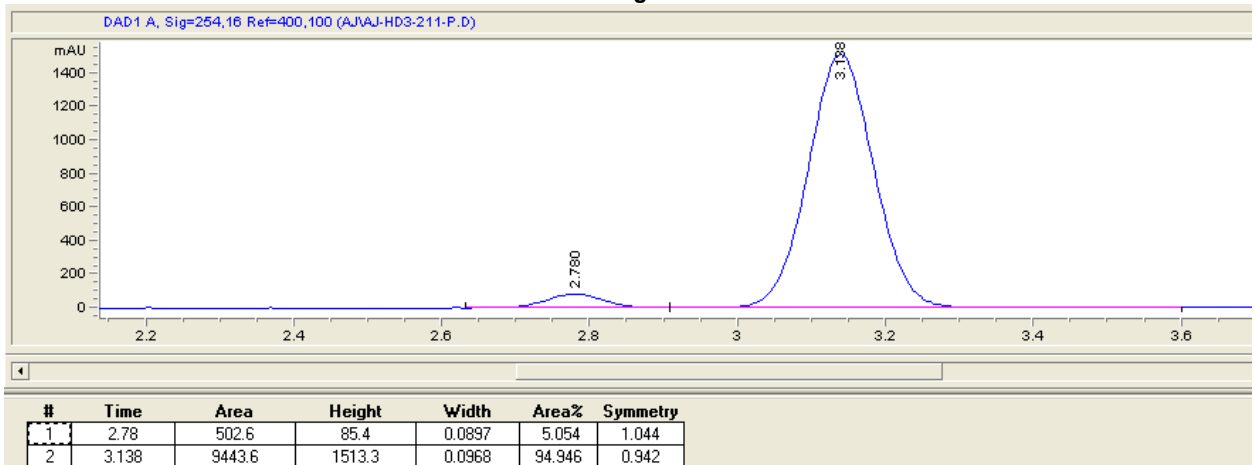

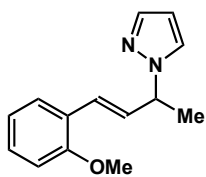

rac-3ha

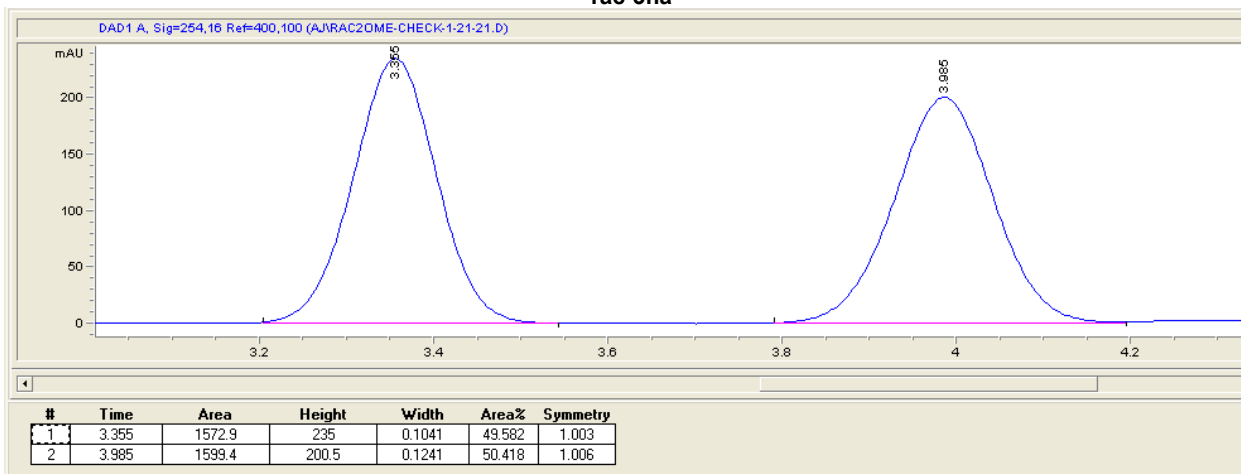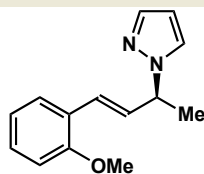

3ha

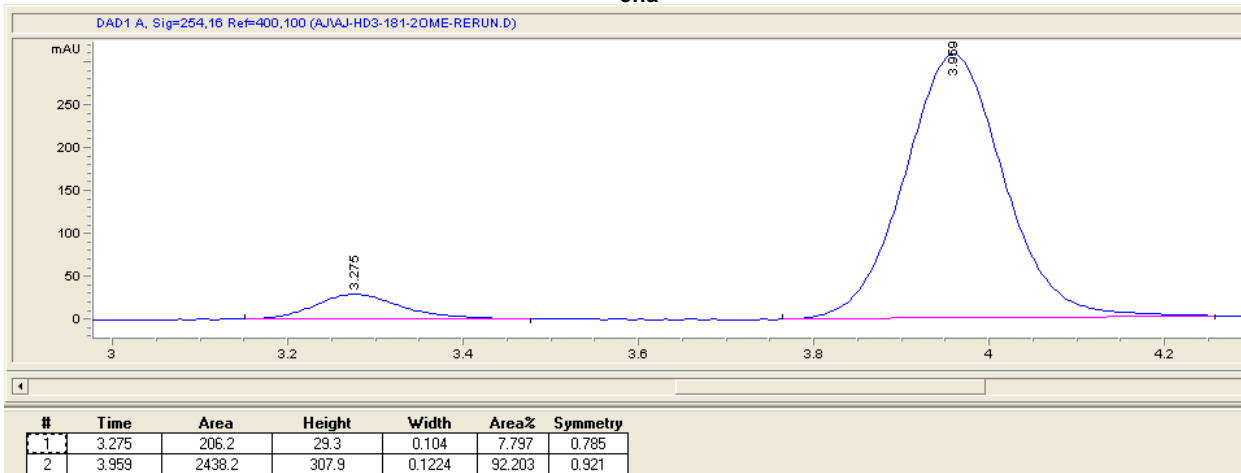

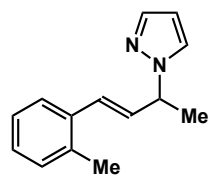

rac-3ia

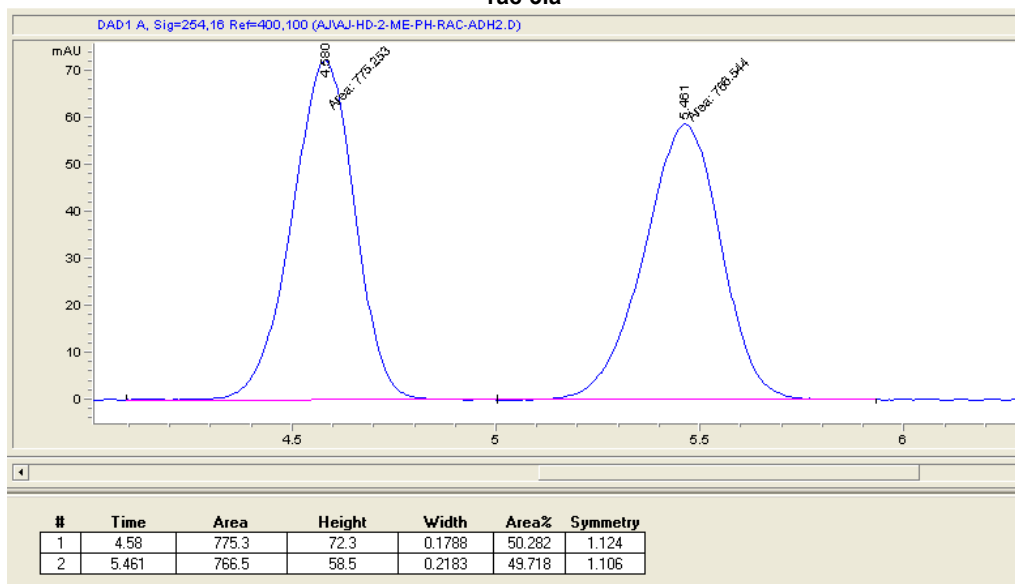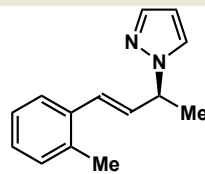

3ia

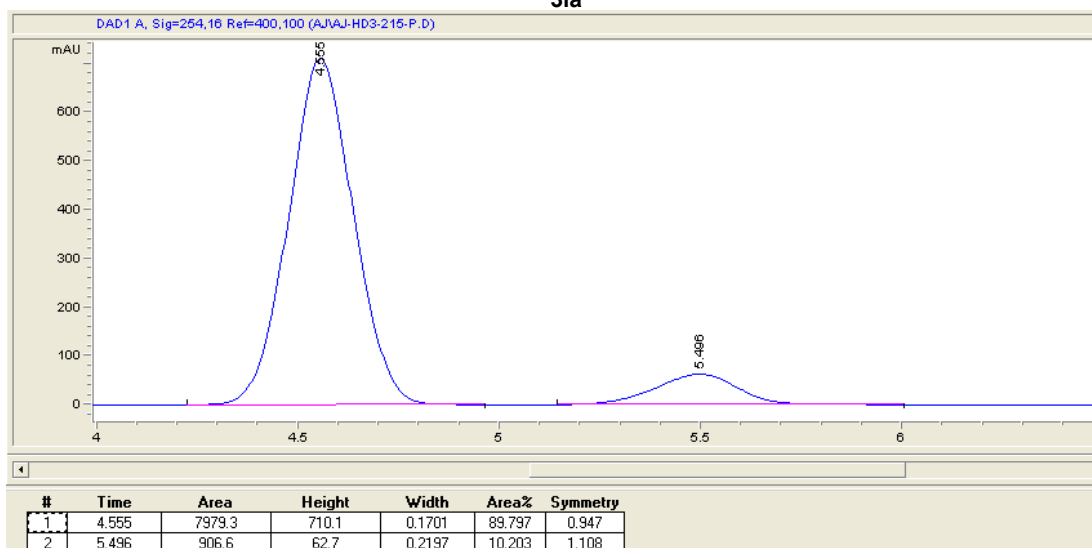

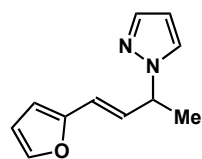

rac-3ja

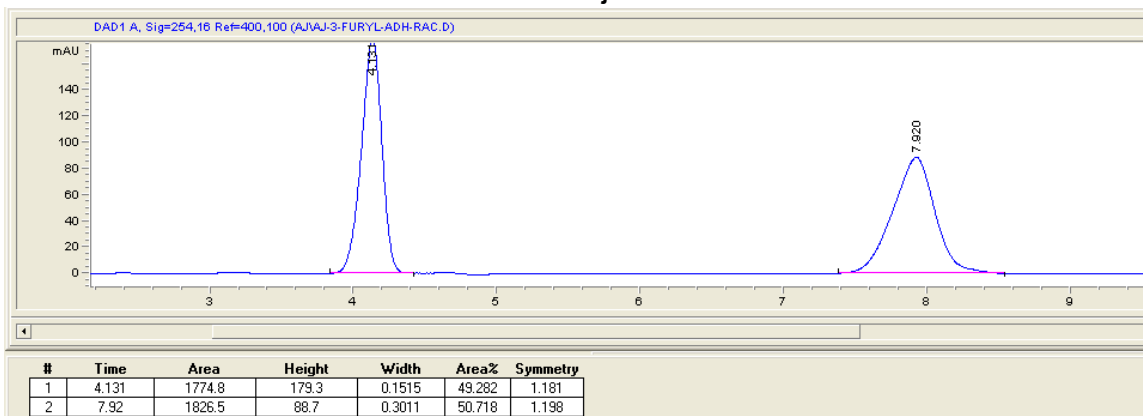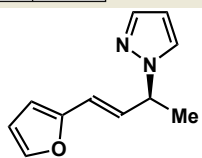

3ja

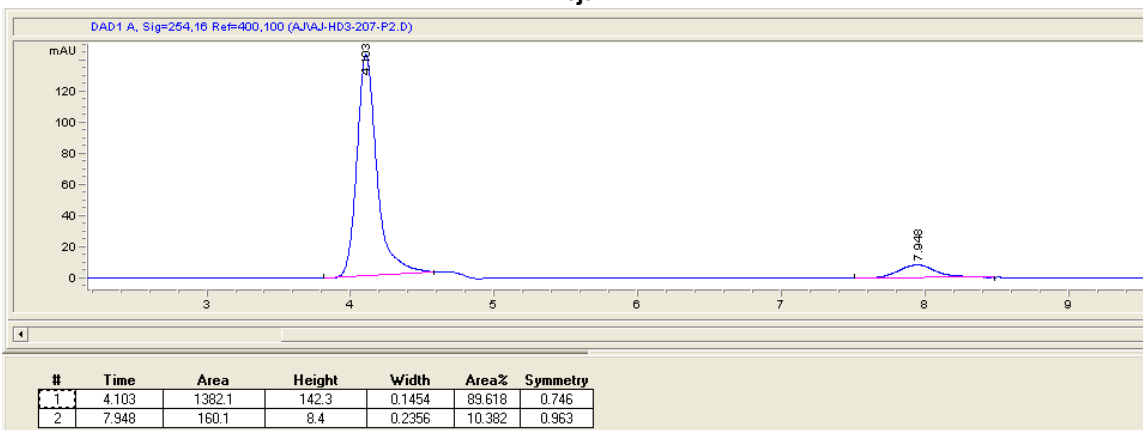

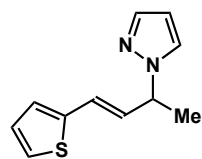

rac-3ka

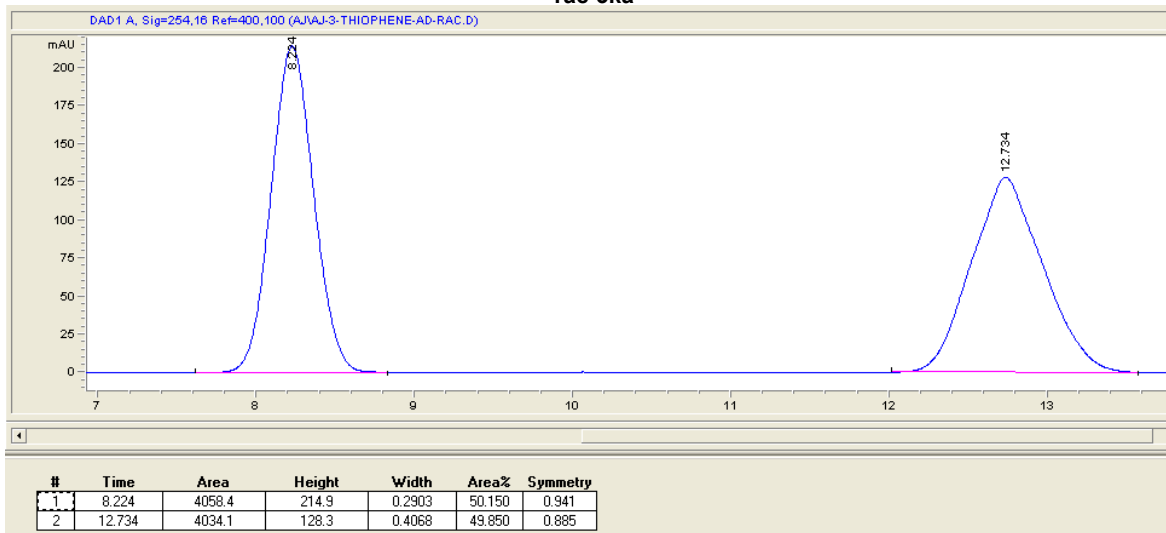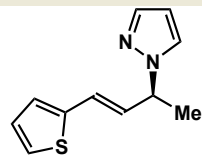

3ka

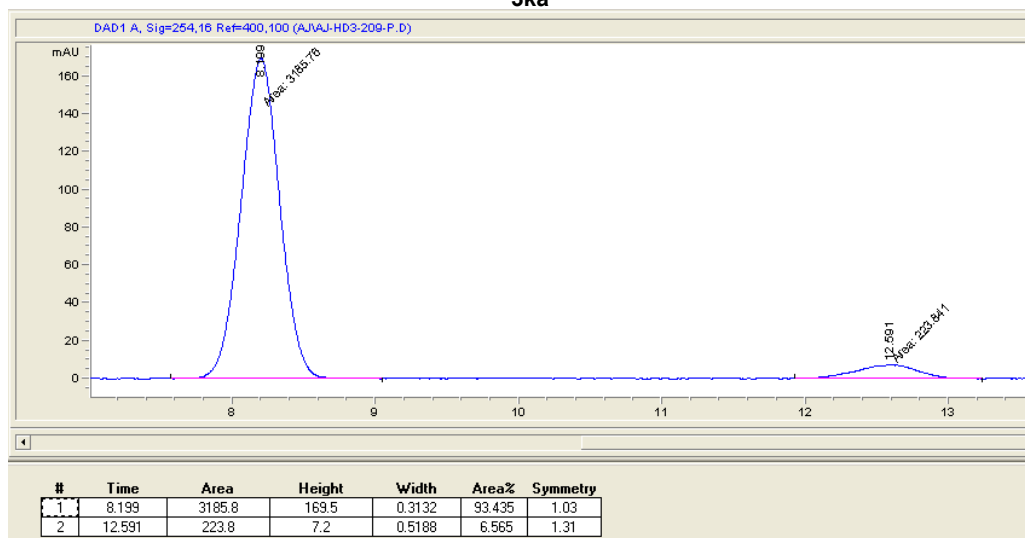

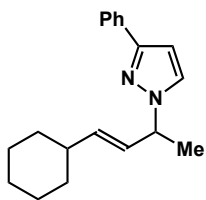

rac-3la

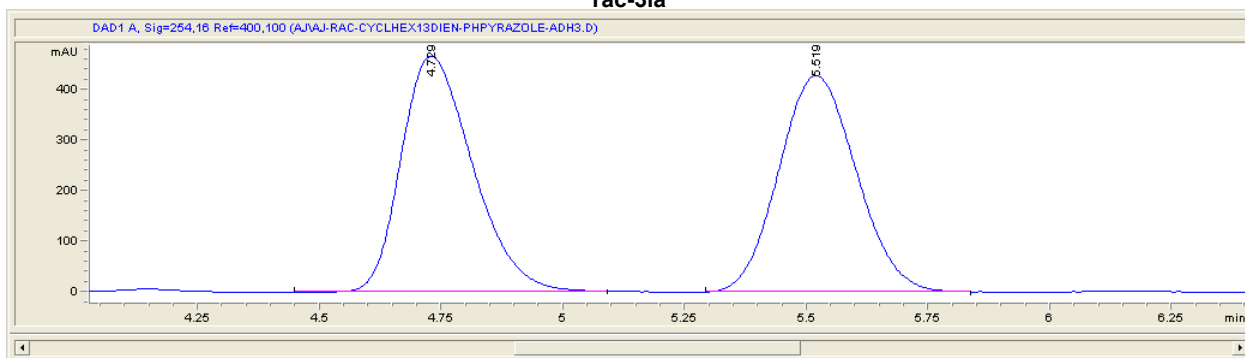

| # | Time  | Area   | Height | Width  | Area%  | Symmetry |
|---|-------|--------|--------|--------|--------|----------|
| 1 | 4.729 | 4772.9 | 466.5  | 0.1604 | 50.118 | 0.681    |
| 2 | 5.519 | 4750.4 | 428.5  | 0.1753 | 49.882 | 0.89     |

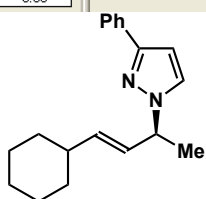

3la

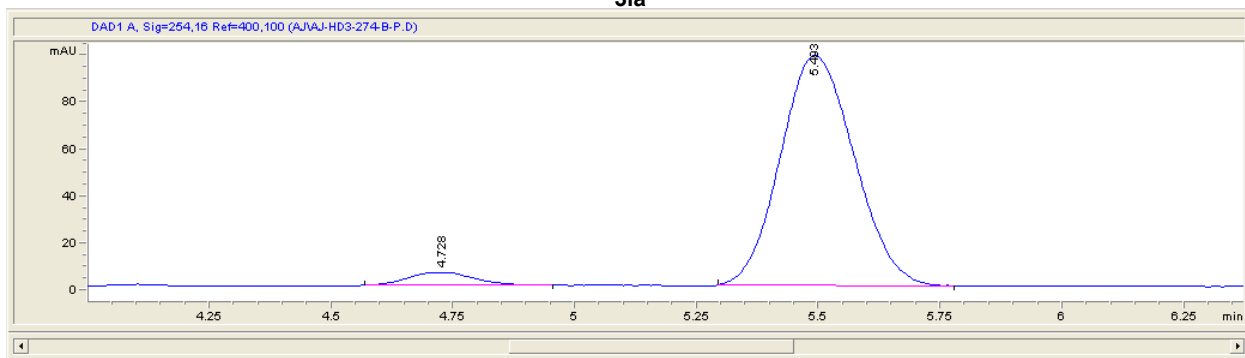

| # | Time  | Area   | Height | Width  | Area%  | Symmetry |
|---|-------|--------|--------|--------|--------|----------|
| 1 | 4.728 | 52.8   | 5.6    | 0.1162 | 4.839  | 1.052    |
| 2 | 5.493 | 1037.7 | 98.2   | 0.1623 | 95.161 | 0.859    |



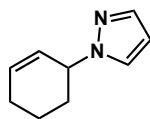

rac-3ma

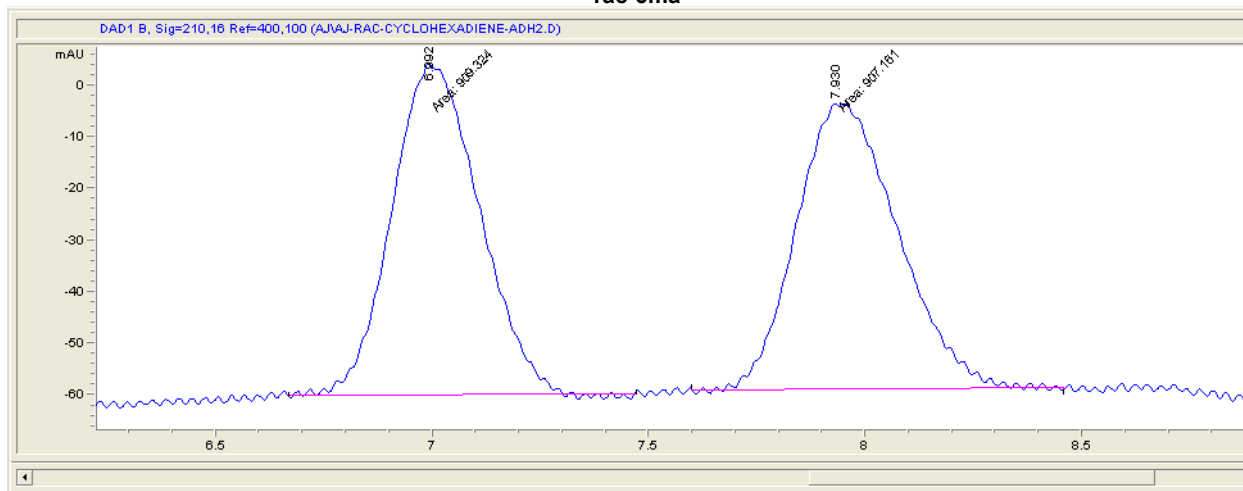

| # | Time  | Area  | Height | Width  | Area%  | Symmetry |
|---|-------|-------|--------|--------|--------|----------|
| 1 | 6.992 | 909.3 | 64.3   | 0.2356 | 50.060 | 0.736    |
| 2 | 7.93  | 907.2 | 55.3   | 0.2732 | 49.940 | 0.623    |

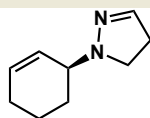

3ma

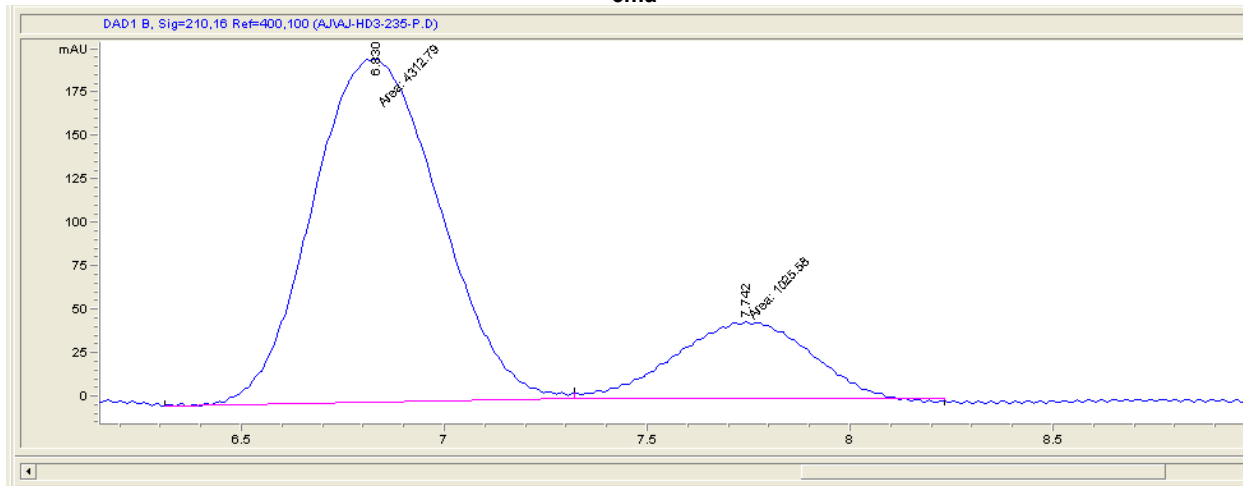

| # | Time  | Area   | Height | Width  | Area%  | Symmetry |
|---|-------|--------|--------|--------|--------|----------|
| 1 | 6.83  | 4312.8 | 197.9  | 0.3632 | 80.789 | 0.97     |
| 2 | 7.742 | 1025.6 | 44.3   | 0.3858 | 19.211 | 1.086    |

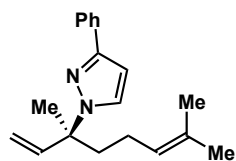

rac-30a

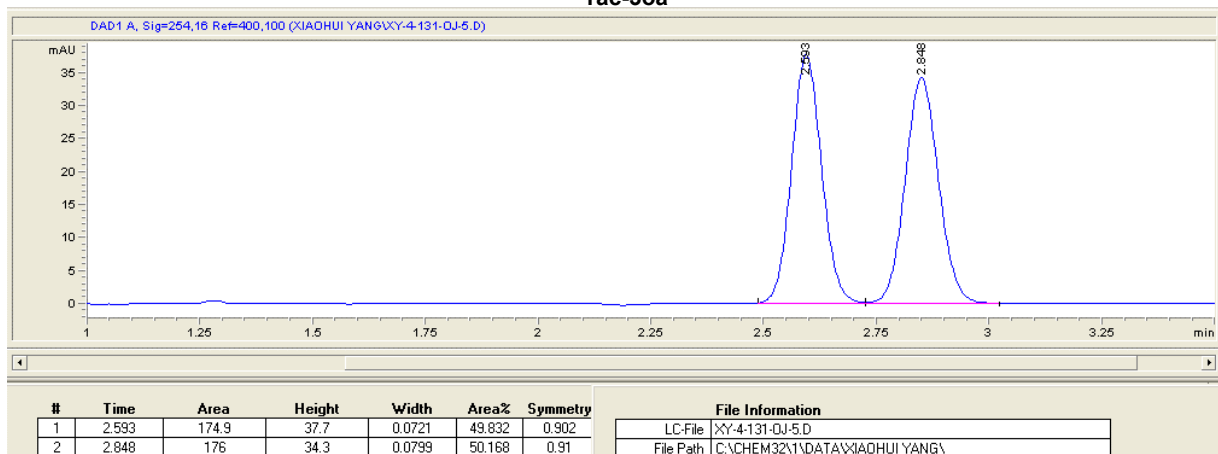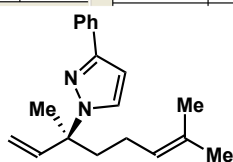

30a

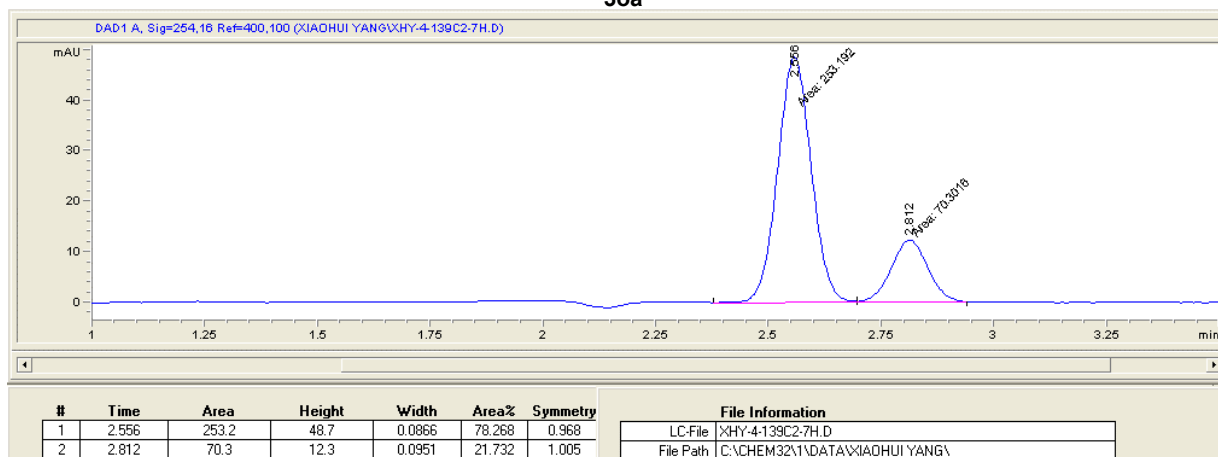

## 8. References

- (1) T. Preuß, W. Saak, S. Doye, *Chem. Eur. J.* **2013**, *19*, 3833.
- (2) N. J. Adamson, E. Hull, S.J. Malcolmson, *J. Am. Chem. Soc.* **2017**, *139*, 7180
- (3) Hitosugi, S.; Tanimoto, D.; Nakanishi, W.; Isobe, H., *Chem. Lett.* **2012**, *41*, 972-973.
- (4) Compound **SI** was prepared following a known procedure, see: J. Mao, W. Bao, *Org. Lett.* **2014**, *16*, 2646.
- (5) Q. Wang, H.-X. Wei, M. Schlosser, *Eur. J. Org. Chem.* **1999**, 3263.
- (6) J. Burés, *Angew. Chem. Int. Ed.* **2016**, *55*, 16084-16087; J. Burés, *Angew. Chem.* **2016**, *128*, 16318-16321.
- (7) S. Balasubramani, G. Chen, S. Coriani, M. Diedenhofen, M. Frank, Y. Franzke, F. Furche, R. Grotjahn, M. Harding, C. Hättig, A. Hellweg, B. Helmich-Paris, C. Holzer, U. Huniar, M. Kaupp, A. Marefat Khah, S. Karbalaei Khani, T. Müller, F. Mack, B. Nguyen, S. Parker, E. Perlt, D. Rappoport, K. Reiter, S. Roy, M. Rückert, G. Schmitz, M. Sierka, E. Tapavicza, D. Tew, C. van Wüllen, V. Voora, F. Weigend, A. Wodyński, J. Yu, *J. Chem. Phys.* **2020**, *152*, 184107-184137.
- (8) (a) C. Lee, W.-T. Yang, R.G. Parr, *Phys. Rev. B.* **1988**, *37*, 785. (b) A.D. Becke, *J. Chem. Phys.* **1993**, *98*, 1372-1377.
- (9) A. Klamt, G. Schüürmann, *J. Chem. Soc., Perkin Trans. 2*, **1993**, 799–805.
- (10) F. Weigend, R. Ahlrichs, *Phys. Chem. Chem. Phys.* **2005**, *7*, 3297-3305.
- (11) B.I. Dunlap, J.W.D. Connolly, J.R. Sabin, *J. Chem. Phys.* **1979**, *71*, 3396–3402.
- (12) K. Eichkorn, F. Weigend, O. Treutler, R. Ahlrichs, *Theor. Chem. Acc.* **1997**, *97*, 119–124.
- (13) F. Furche, D. Rappoport, *Theor. Comput. Chem.* **2005**, *16*, 93–128.
- (14) H. Eshuis, J.E. Bates, F. Furche, *Theor. Chem. Acc.* **2012**, *131*, 1084.
